# Supplementary material for: Synthesis and reactivity of 9,10-bis(4-trimethylsilylethynylbuta-1,3-diynyl)anthracene derived chromophores
Source: Royal Society of Chemistry journal article supplement (doi:10.1039/d3dt00147d), 2023-01-01
Supplement: d3dt00147d1.pdf [file d3dt00147d1.pdf]

## Electronic Supporting information

### Synthesis and reactivity of 9,10-bis(4-trimethylsilylethynylbuta-1,3-diynyl)anthracene derived chromophores

Benjamin J. Frogley and Anthony F. Hill

**General Experimental Conditions and Instrumentation** - Unless otherwise stated, experimental work was carried out at room temperature under a dry and oxygen-free nitrogen atmosphere using standard Schlenk techniques with dried and degassed solvents.

NMR spectra were obtained on a Bruker Avance 400 (<sup>1</sup>H at 400.1 MHz, <sup>13</sup>C at 100.6 MHz, <sup>31</sup>P at 162.0) or a Bruker Avance 700 (<sup>1</sup>H at 700.0 MHz, <sup>13</sup>C at 176.1 MHz) spectrometers at the temperatures indicated. Chemical shifts (δ) are reported in ppm with coupling constants given in Hz and are referenced to the proteo-impurity (<sup>1</sup>H), the deuterated solvent itself (<sup>13</sup>C), or externally referenced (CFCl<sub>3</sub> for <sup>19</sup>F{<sup>1</sup>H}, 85% H<sub>3</sub>PO<sub>4</sub> in H<sub>2</sub>O for <sup>31</sup>P{<sup>1</sup>H}). The multiplicities of NMR resonances are denoted by the abbreviations s (singlet), d (doublet), t (triplet), m (multiplet), br (broad) and combinations thereof for more highly coupled systems. In some cases, distinct peaks were observed in the <sup>1</sup>H and <sup>13</sup>C{<sup>1</sup>H} NMR spectra, but to the level of accuracy that is reportable (i.e. 2 decimal places for <sup>1</sup>H NMR, 1 decimal place for <sup>13</sup>C NMR) they are reported as having the same chemical shift. The abbreviation 'pz' is used to refer to the pyrazolyl rings on the hydrotris(3,5-dimethylpyrazol-1-yl)borate (Tp\*) ligand. Spectra provided generally correspond to samples obtained directly from chromatography and may contain residual solvent as recrystallised samples often display reduced solubility.

Infrared spectra were obtained using a Shimadzu FTIR-8400 spectrometer. The strengths of IR absorptions are denoted by the abbreviations vs (very strong), s (strong), m (medium), w (weak), sh (shoulder) and br (broad). UV/Vis data were collected from solutions in 1 cm quartz cells using a PerkinElmer Lambda 465 spectrophotometer. Fluorescence data were collected on a Varian Cary Eclipse fluorescence spectrophotometer. Elemental microanalytical data were provided the London Metropolitan University or Macquarie University microanalytical services. High-resolution electrospray ionisation mass spectrometry (ESI-MS) was performed by the ANU Research School of Chemistry mass spectrometry service with acetonitrile or methanol as the matrix.

Data for X-ray crystallography were collected with an Agilent SuperNova CCD diffractometer using Cu-Kα

radiation (λ = 1.54184 Å) and the CrysAlis PRO software.<sup>1</sup> The structures were solved by intrinsic phasing methods and refined by full-matrix least-squares on F<sup>2</sup> using the SHELXT and SHELXL programs.<sup>2</sup> Hydrogen atoms were located geometrically and refined using a riding model. Diagrams were produced using the CCDC visualisation program Mercury.<sup>3</sup> Structural data for 9,10-bis(phenylbut-1,3-diyn-1-yl)anthracene (**5**) were collected at the Australian Synchrotron using the MX1 beamline using silicon double crystal monochromated synchrotron radiation at 100 K. Raw frame data were collected using BluIce<sup>4</sup> and data reduction, interframe scaling, unit cell refinement and absorption corrections were processed using XDS.<sup>5</sup> Crystallographic data for complexes described herein may be obtained from the Cambridge Crystallographic Data Centre CCDC 2231630-2231635.

Computational studies were performed by using the SPARTAN20® suite of programs.<sup>6</sup> Geometry optimisation (gas phase) was performed at the DFT level of theory using the ωB97X-D exchange functionals of Head-Gordon.<sup>7</sup> The Los Alamos effective core potential type basis set (LANL2DQ) of Hay and Wadt<sup>8</sup> was used for Au while Pople 6-31G\* basis sets<sup>9</sup> were used for all other atoms. Frequency calculations were performed for all compounds to confirm that each optimized structure was a local minimum and also to identify vibrational modes of interest. Cartesian atomic coordinates are provided below.

## References

- 1 Agilent, *CrysAlis PRO*, Agilent Technologies Ltd, Yarnton, Oxfordshire, England, 2014.
- 2 (a) G. Sheldrick, *Acta Crystallogr. Sect. A: Found. Crystallogr.*, 2008, **64**, 112-122; (b) G. M. Sheldrick, *Acta Crystallogr. Sect. C: Cryst. Struct. Commun.*, 2015, **71**, 3-8.
- 3 (a) C. F. Macrae, P. R. Edgington, P. McCabe, E. Pidcock, G. P. Shields, R. Taylor, M. Towler and J. van de Streek, *J. Appl. Crystallogr.*, 2006, **39**, 453-457; (b) C. F. Macrae, I. J. Bruno, J. A. Chisholm, P. R. Edgington, P. McCabe, E. Pidcock, L. Rodriguez-Monge, R. Taylor, J. van de Streek and P. A. Wood, *J. Appl. Crystallogr.*, 2008, **41**, 466-470.
- 4 T. M. McPhillips, S. E. McPhillips, H.-J. Chiu, A. E. Cohen, A. M. Deacon, P. J. Ellis, E. Garman, A. Gonzalez, N. K. Sauter, R. P. Phizackerley, S. M. Soltis and P. Kuhn, *J. Synchrotron Rad.*, 2002, **9**, 401-406.
- 5 W. Kabsch, *J. Appl. Crystallogr.*, 1993, **26**, 795-800.
- 6 *Spartan 20®* (2020) Wavefunction, Inc., 18401 Von Karman Ave., Suite 370 Irvine, CA 92612 U.S.A.
- 7 (a) J. D. Chai and M. Head-Gordon, *J Chem Phys.*, 2008, **128**, 084106. (b) J. D. Chai and M. Head-Gordon, *Phys. Chem. Chem. Phys.*, 2008, **10**, 6615-6620.
- 8 (a) P. J. Hay and W. R. Wadt, *J. Chem. Phys.*, 1985, **82**, 270-283. (b) P. J. Hay and W. R. Wadt, *J. Chem. Phys.*, 1985, **82**, 299-310. (c) W. R. Wadt and P. J. Hay, *J. Chem. Phys.*, 1985, **82**, 284-298.
- 9 W. J. Hehre, R. Ditchfeld and J. A. Pople, *J. Chem. Phys.*, 1972, **56**, 2257-2261.

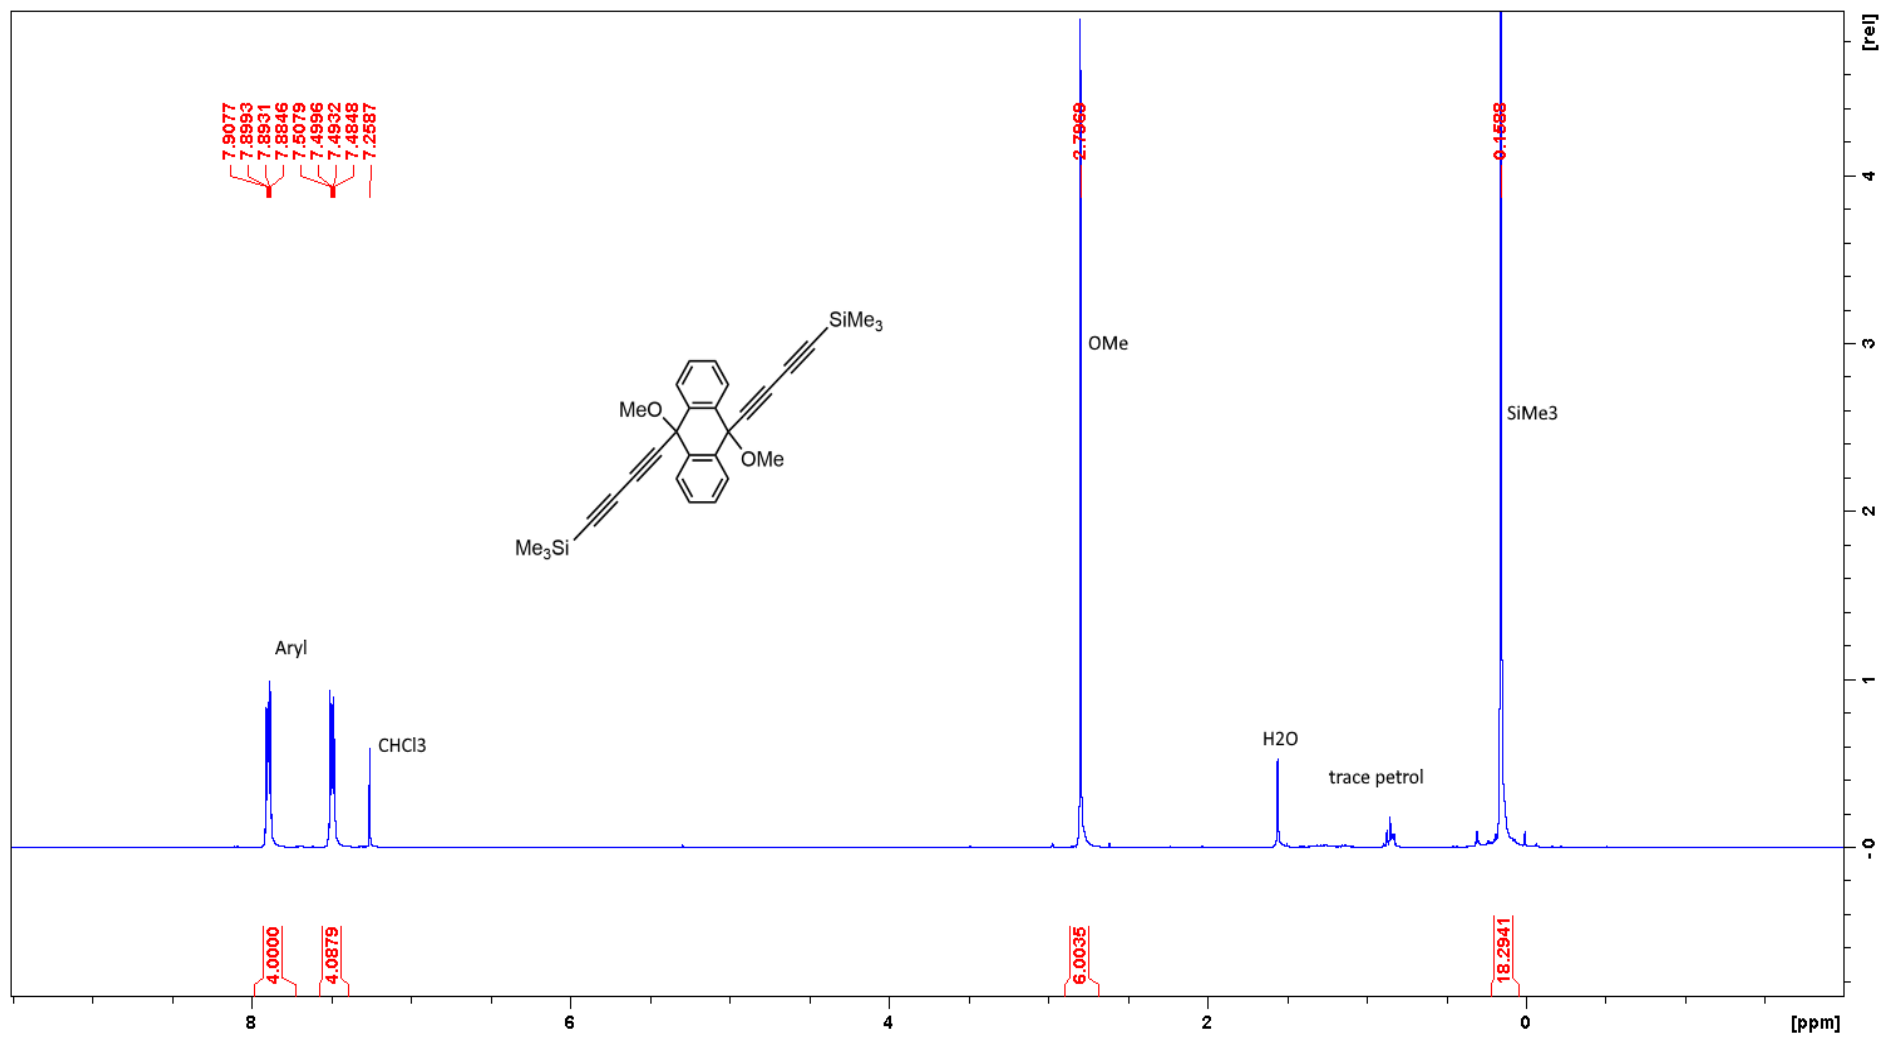

Figure S1. <sup>1</sup>H NMR (400 MHz, CDCl<sub>3</sub>, 25°C, δ) of *trans*-9,10-dimethoxy-9,10-bis(trimethylsilyl)but-1,3-diyne-1-yl dihydroanthracene (2).

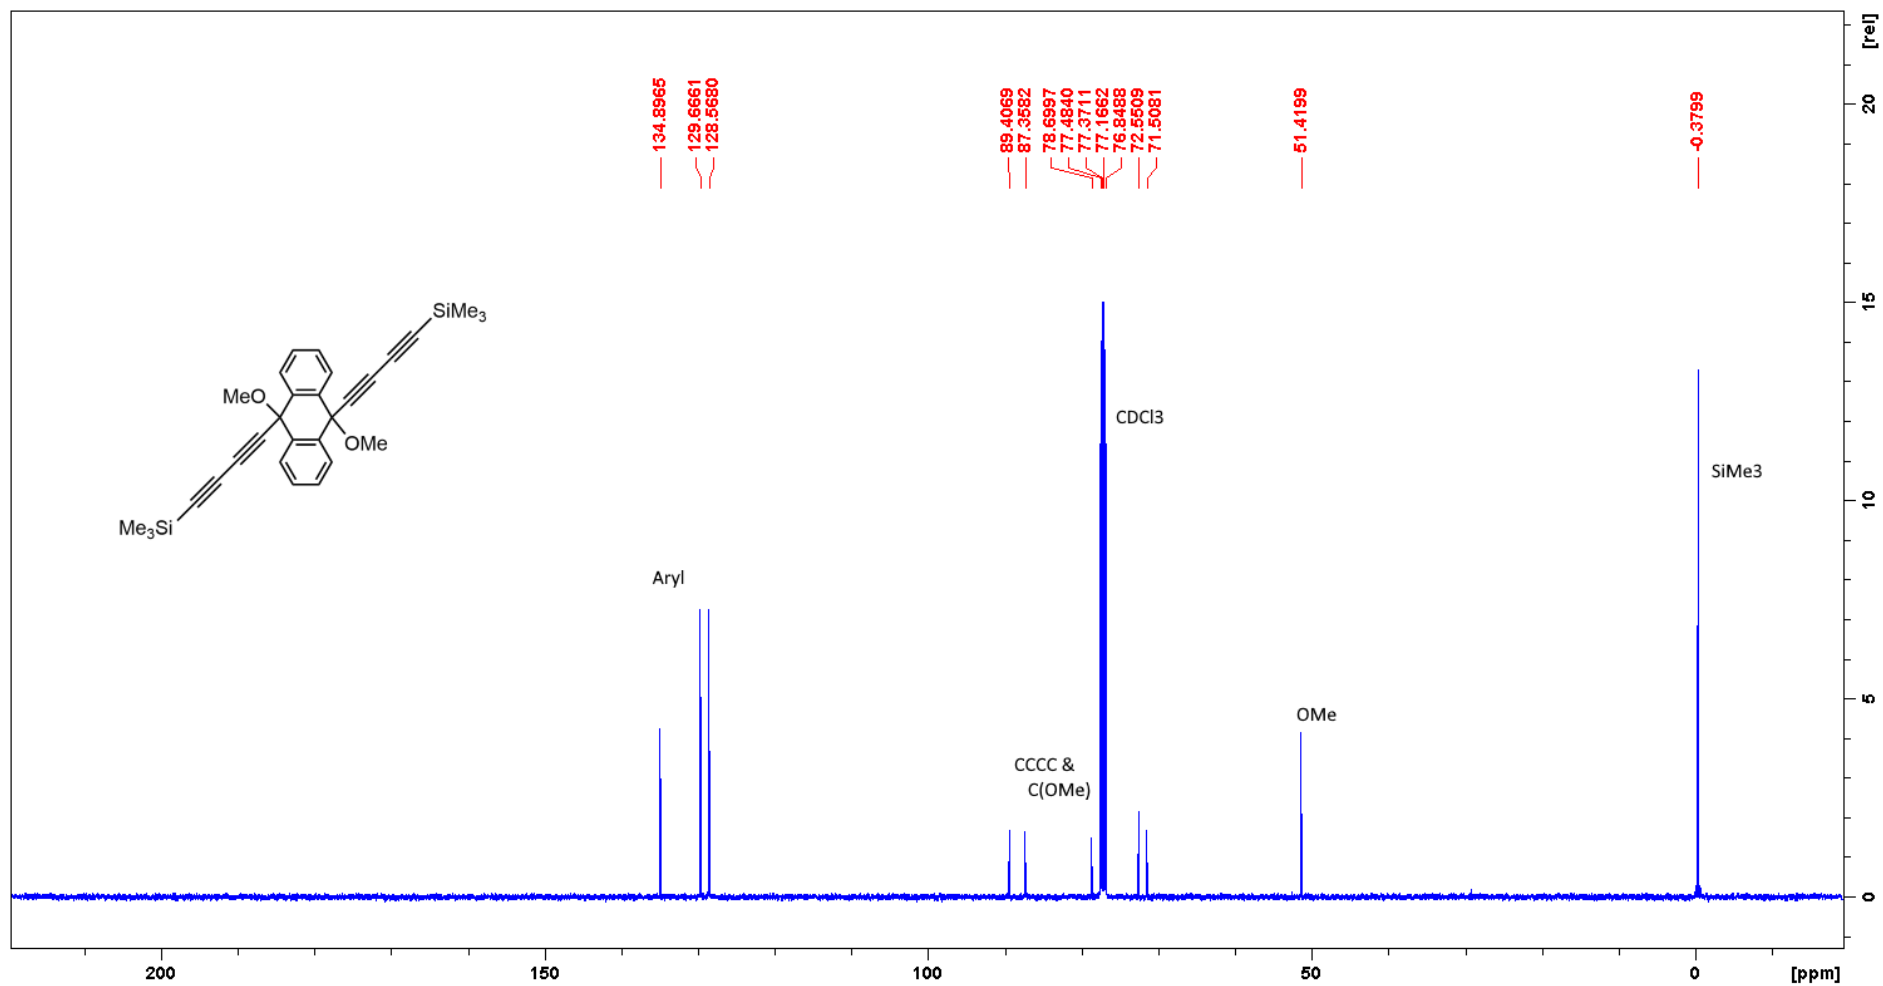

Figure S2.  $^{13}\text{C}$  NMR (75 MHz,  $\text{CDCl}_3$ , 25°C,  $\delta$ ) of *trans*-9,10-dimethoxy-9,10-bis(trimethylsilyl)but-1,3-diyndihydroanthracene (2).

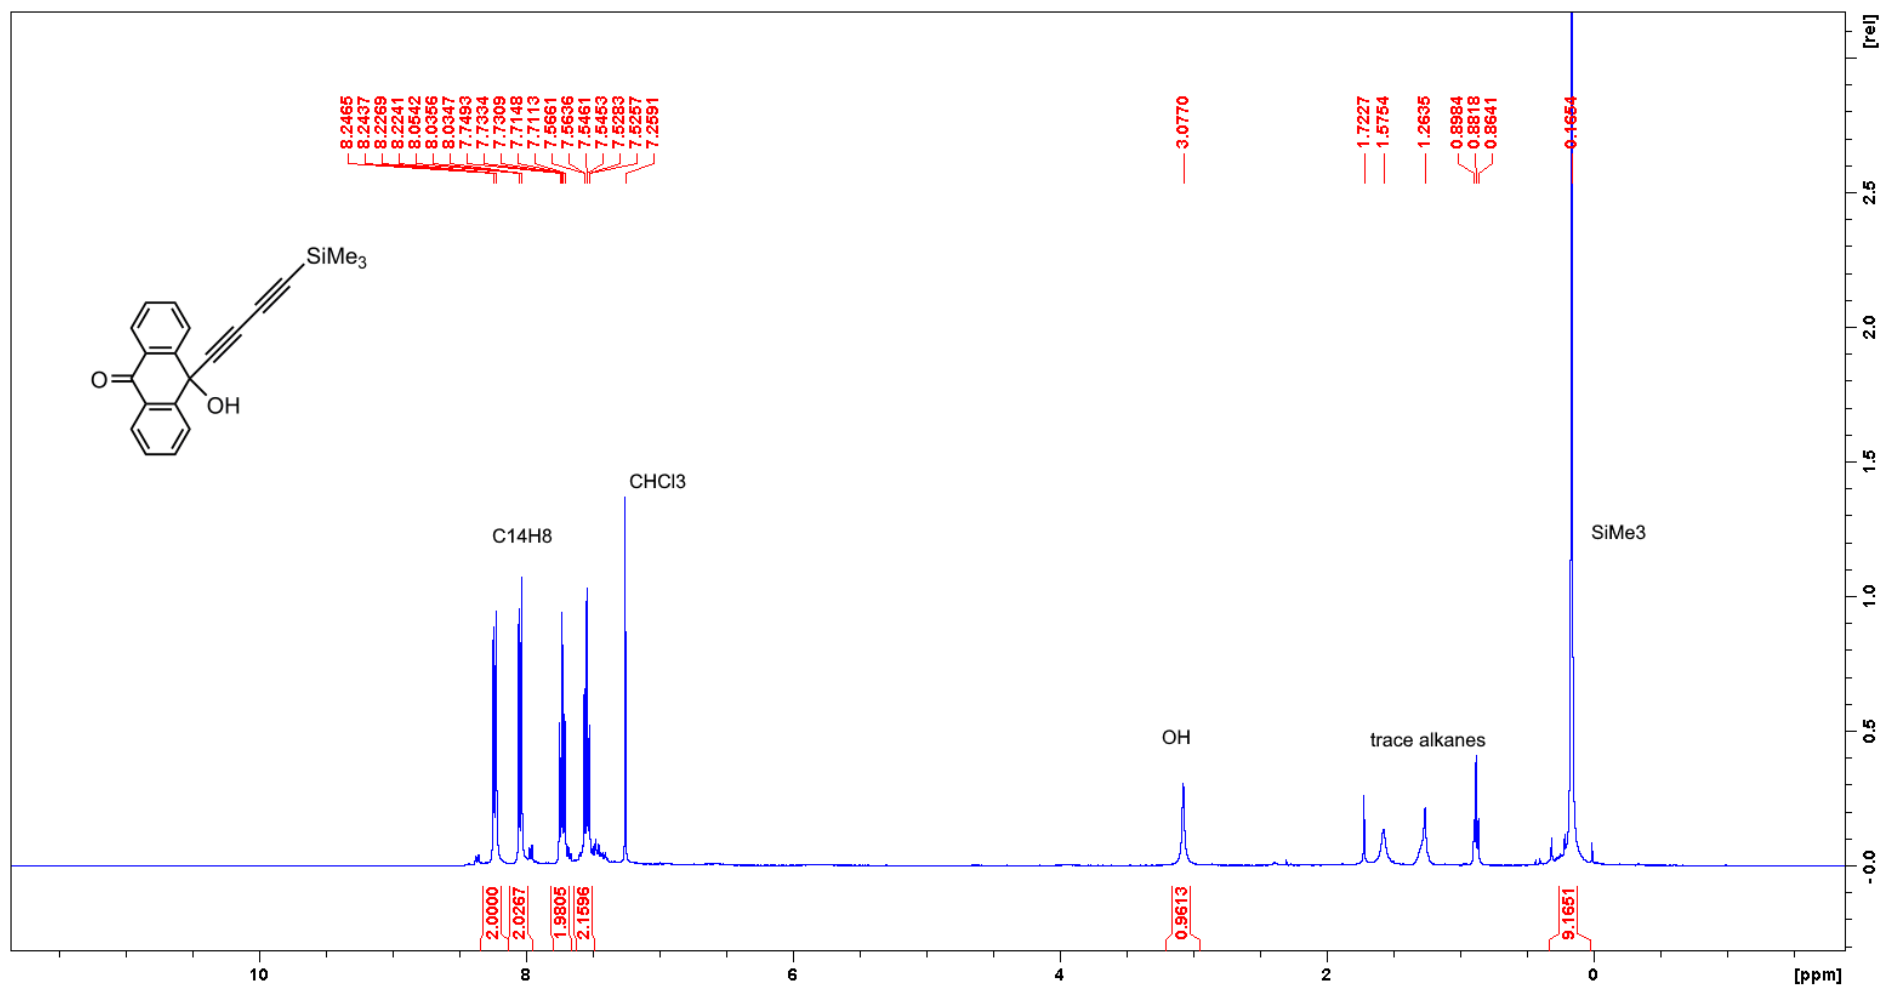

Figure S3. <sup>1</sup>H NMR (400 MHz, CDCl<sub>3</sub>, 25 °C, δ) of 10-hydroxy-10-(trimethylsilyl)buta-1,3-diyne-1-ylanthracen-9(10H)-one (3).

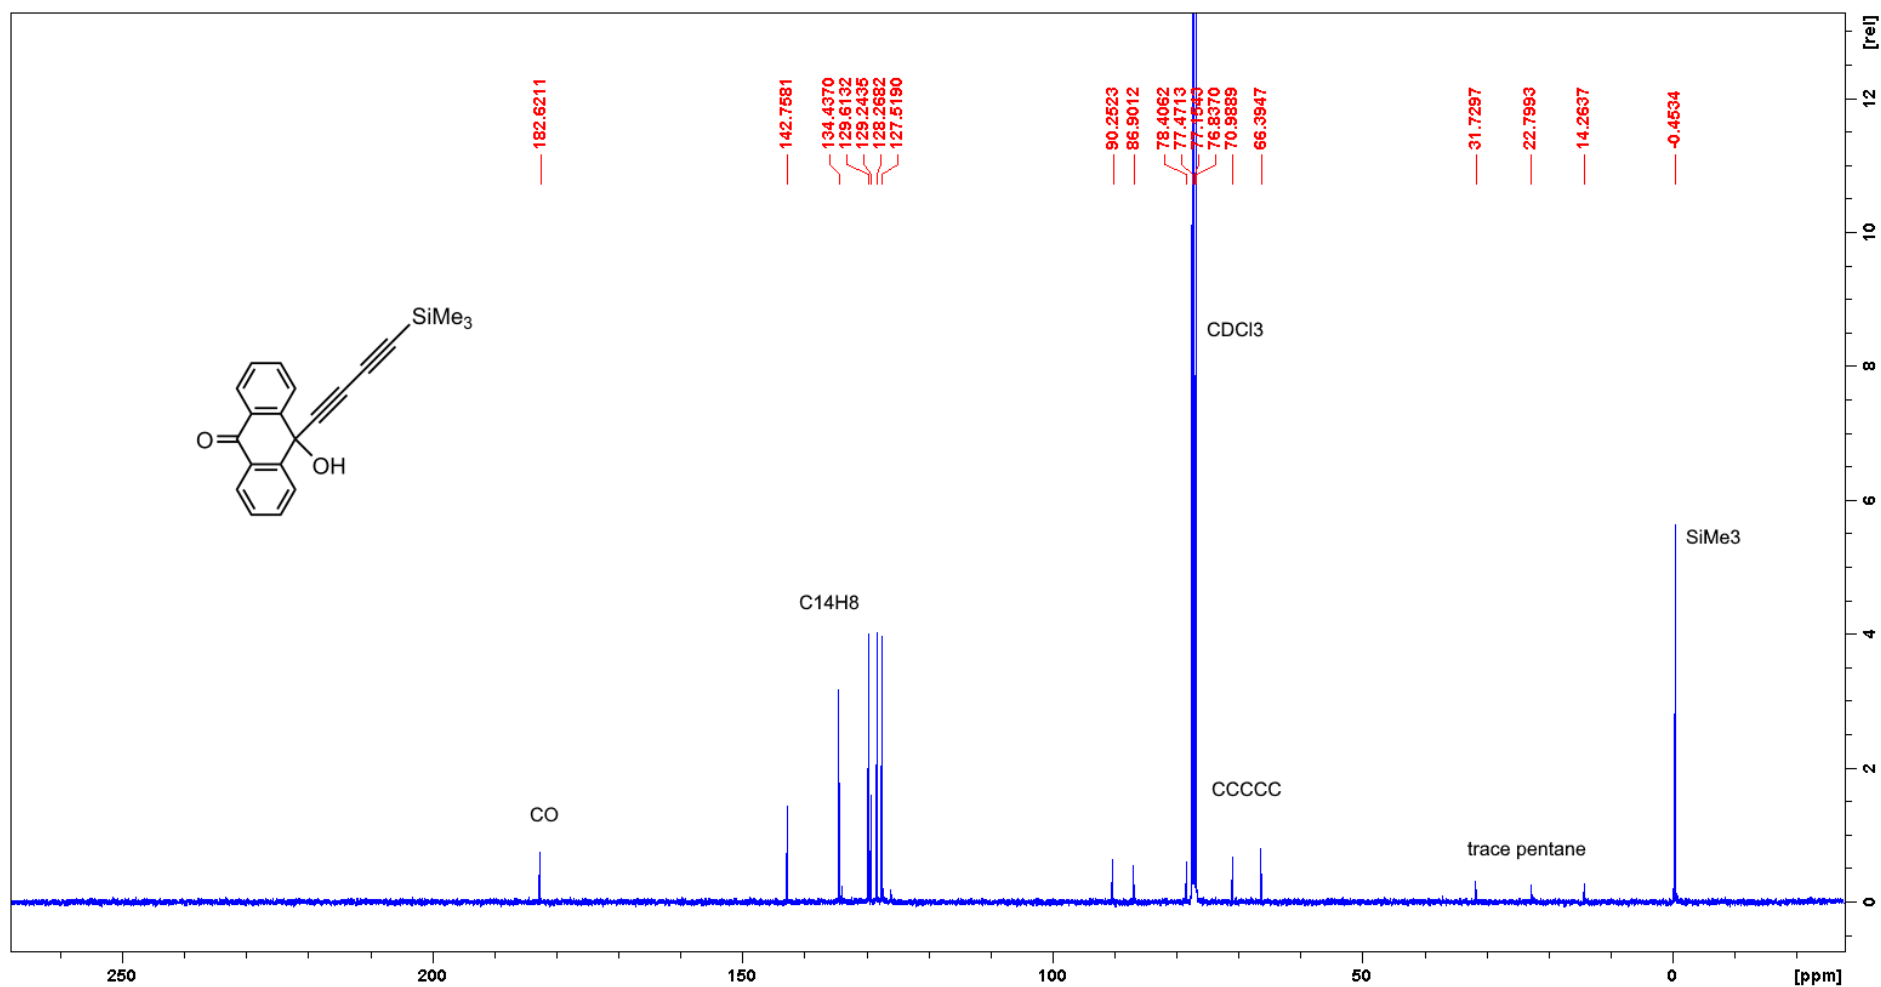

Figure S4.  $^{13}\text{C}$  NMR (101 MHz,  $\text{CDCl}_3$ , 25°C,  $\delta$ ) of 10-hydroxy-10-(trimethylsilylbuta-1,3-dien-1-yl)anthracen-9(10H)-one (3).

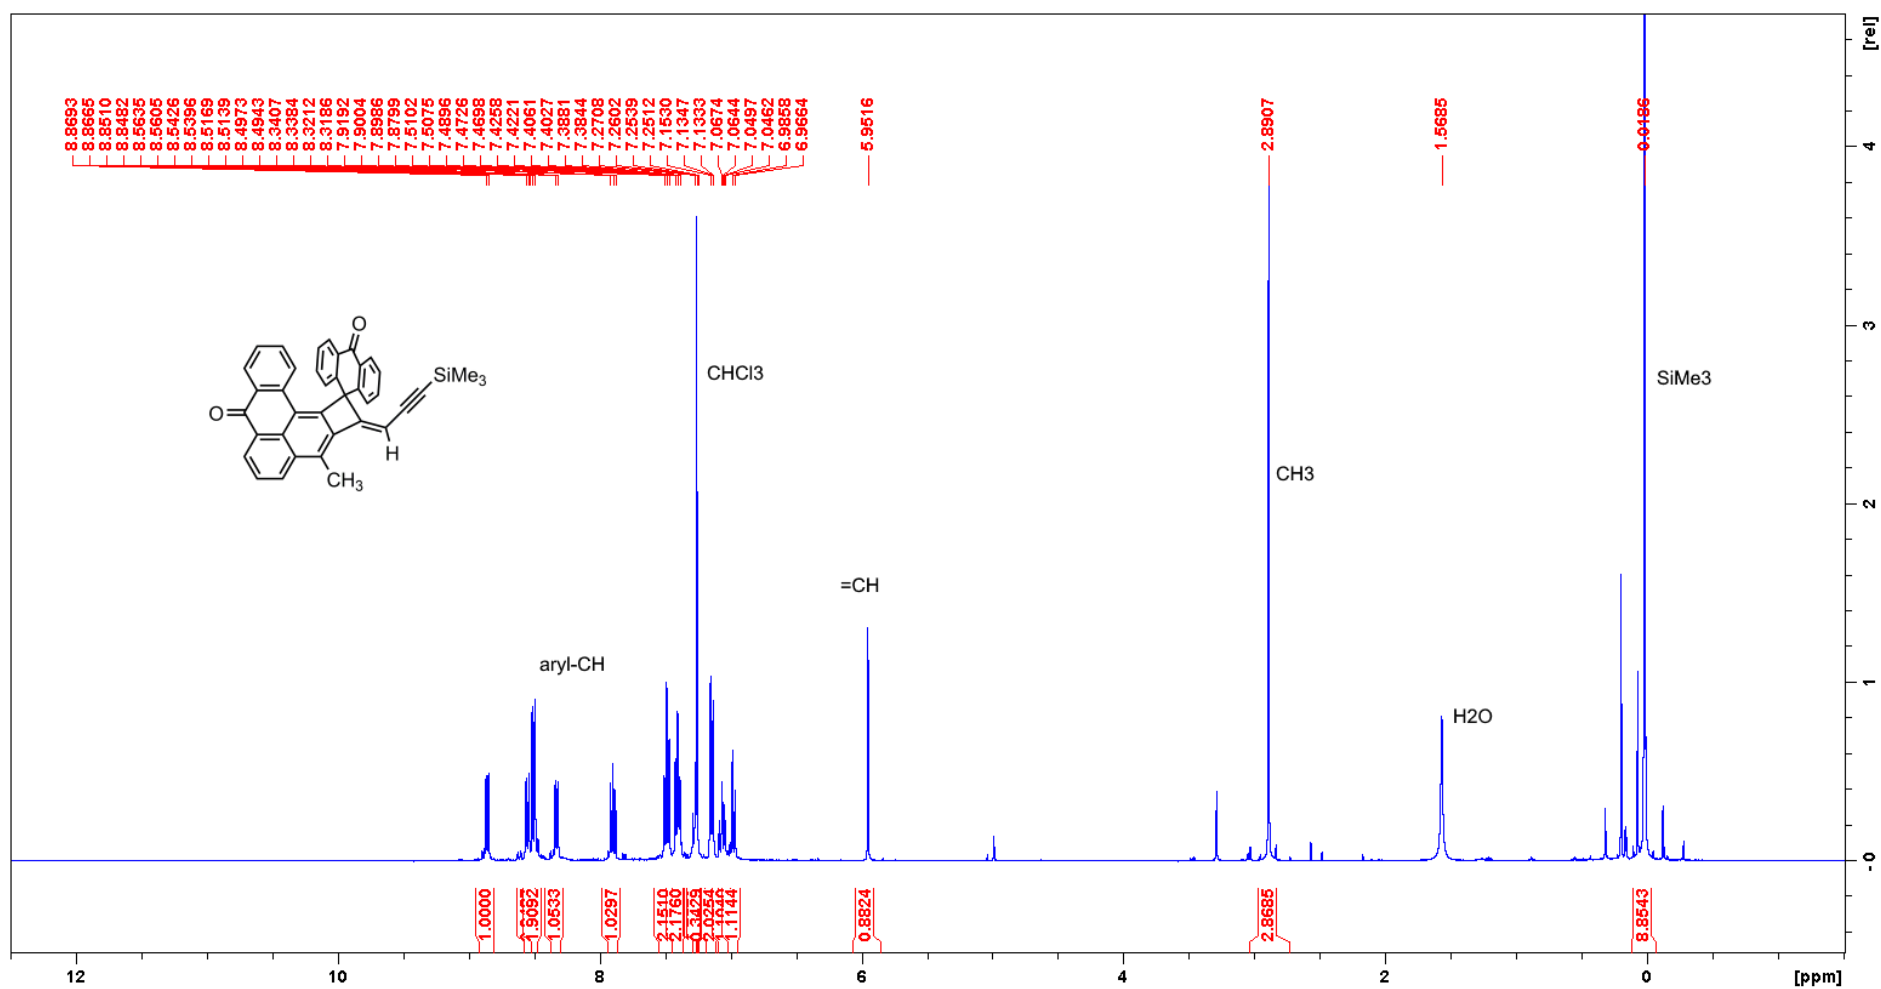Figure S5. <sup>1</sup>H NMR (400 MHz, CDCl<sub>3</sub>, 25°C, δ) of the dimerization product (4).

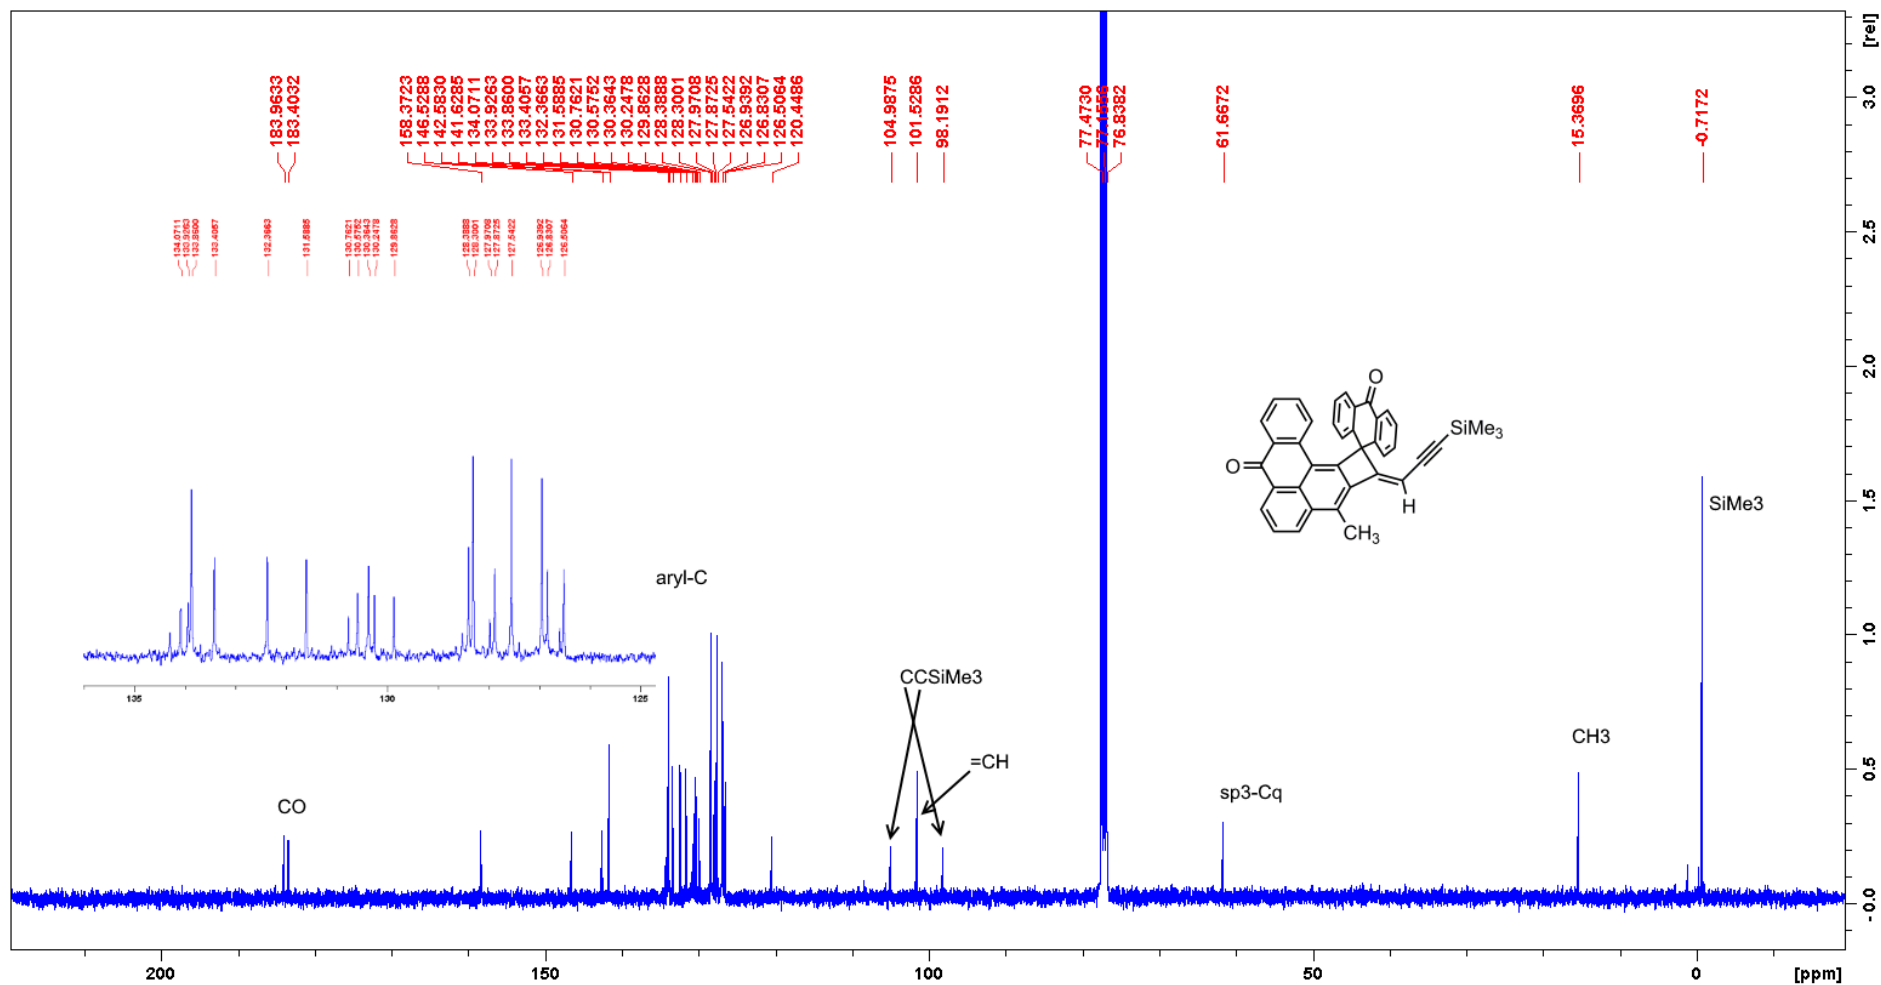

Figure S6.  $^{13}\text{C}\{^1\text{H}\}$  NMR (101 MHz,  $\text{CDCl}_3$ , 25°C,  $\delta$ ) of dimerization product (4).

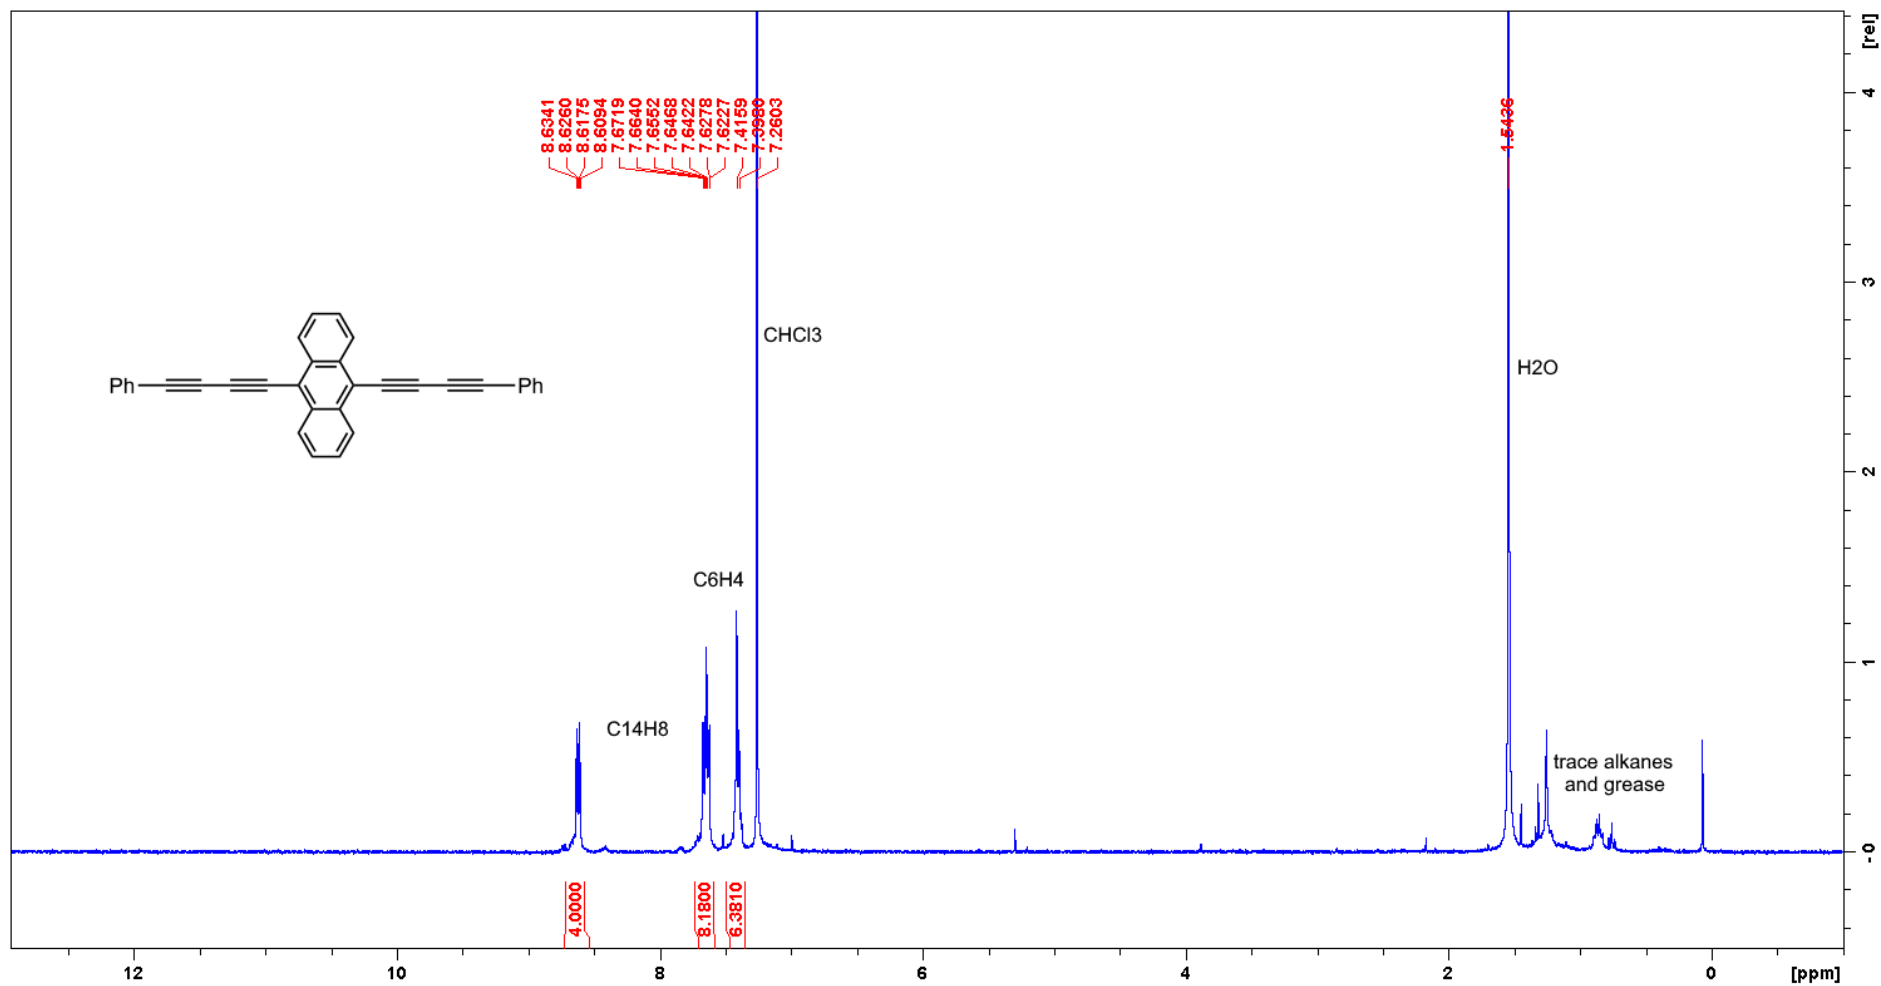

Figure S7.  $^1\text{H}$  NMR (400 MHz,  $\text{CDCl}_3$ , 25°C,  $\delta$ ) of 9,10-bis(phenylbut-1,3-diy-1-yl)anthracene (5).



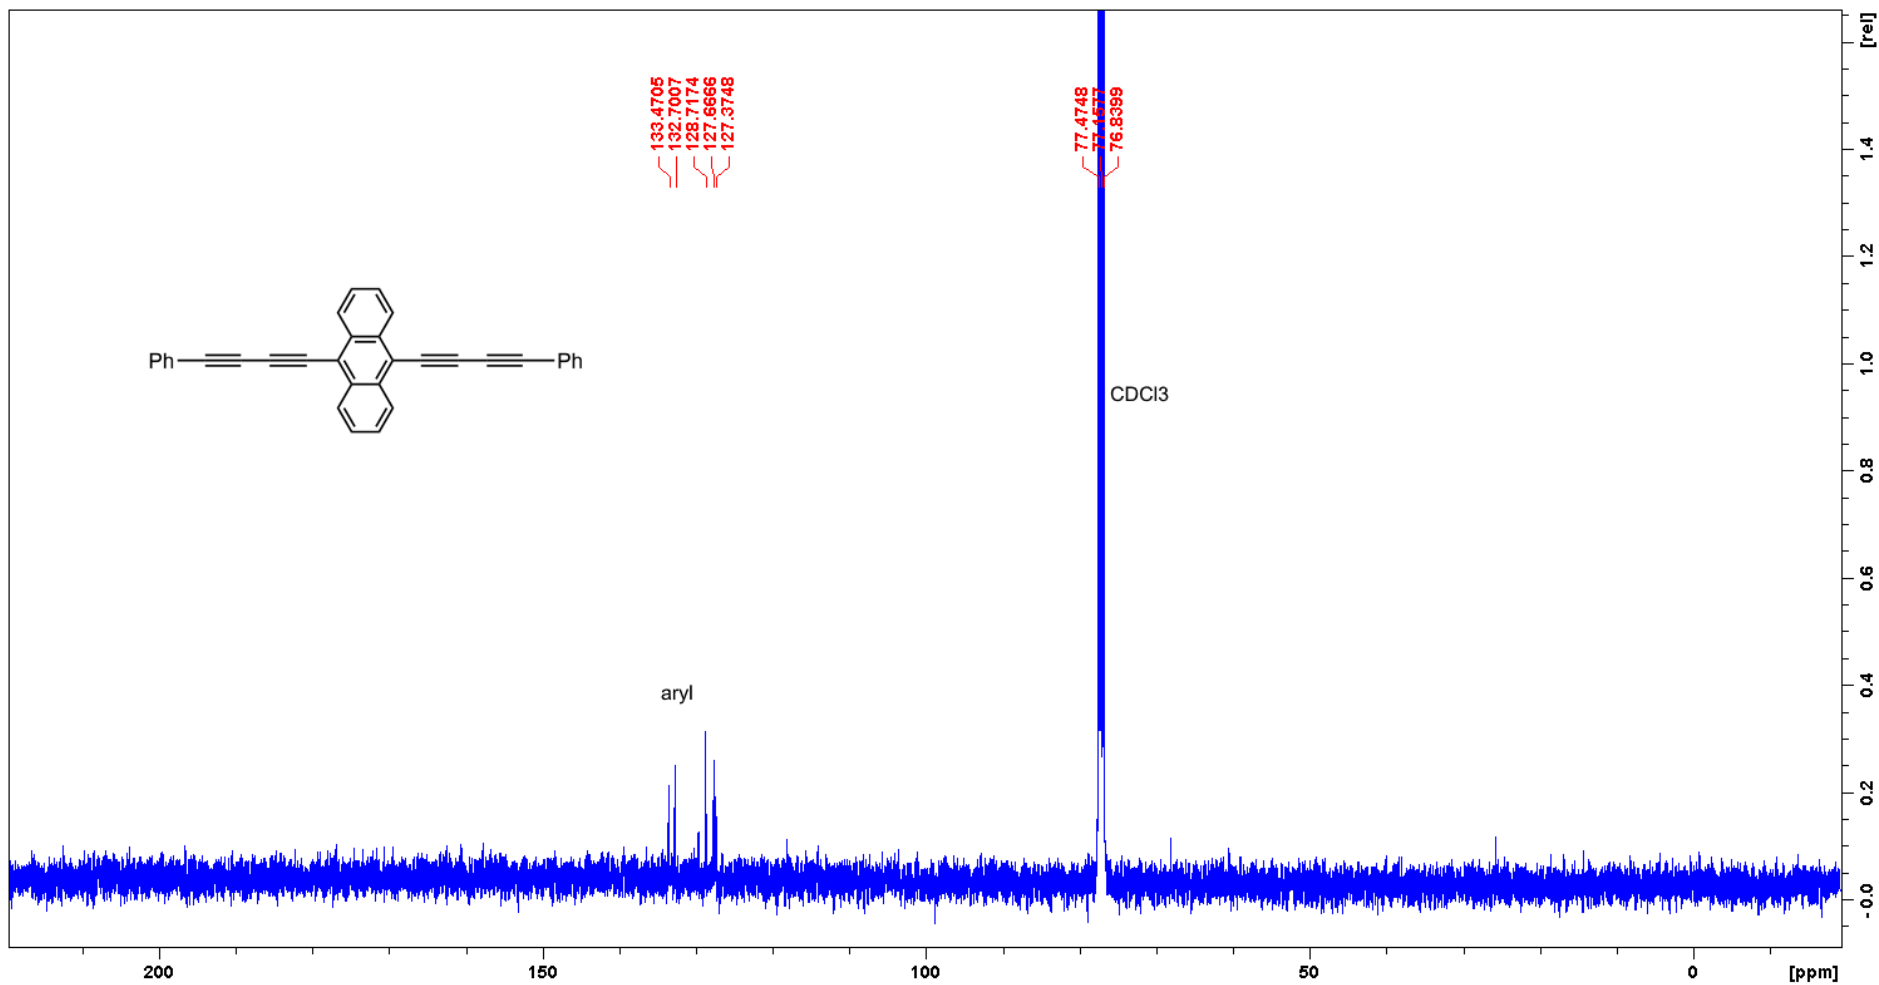

Figure S8.  $^{13}\text{C}$  NMR (101 MHz,  $\text{CDCl}_3$ , 25°C,  $\delta$ ) of 9,10-bis(phenylbut-1,3-diyn-1-yl)anthracene (5).

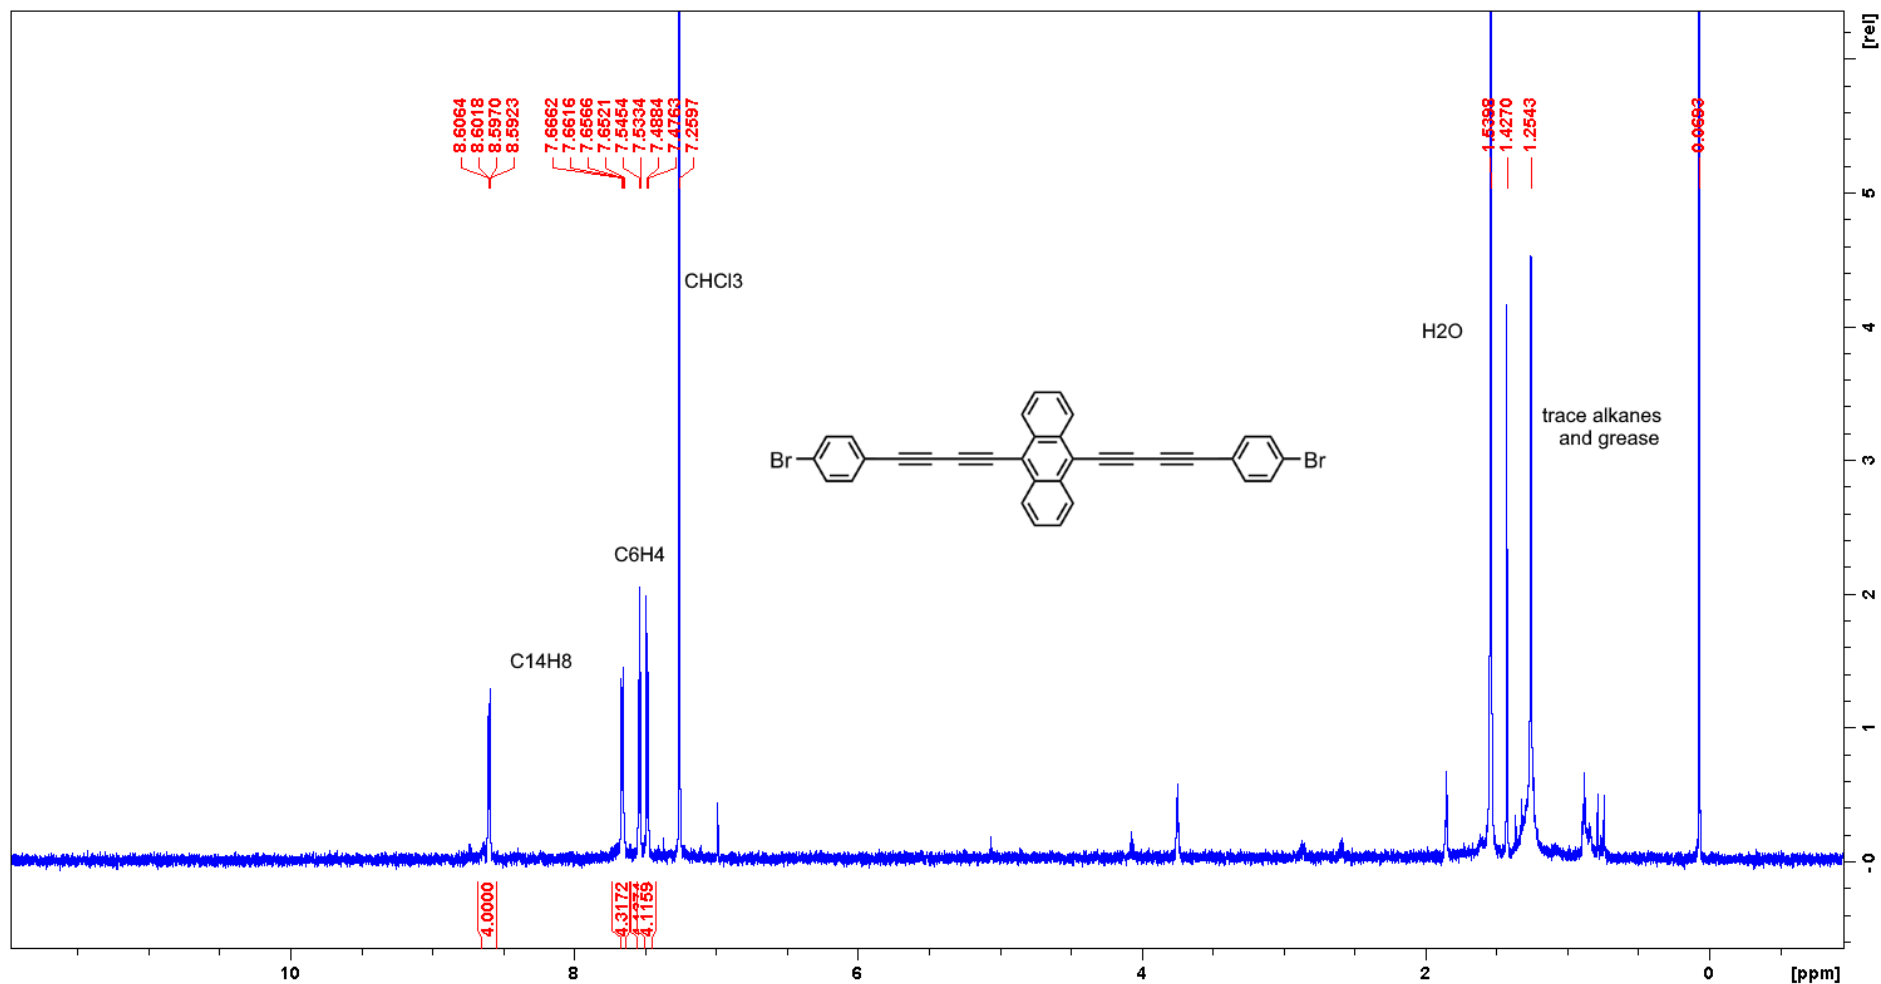

Figure S9.  $^1\text{H}$  NMR (700 MHz,  $\text{CDCl}_3$ ,  $25^\circ\text{C}$ ,  $\delta$ ) of 9,10-bis((4-bromophenyl)but-1,3-diy-1-yl)anthracene (6).

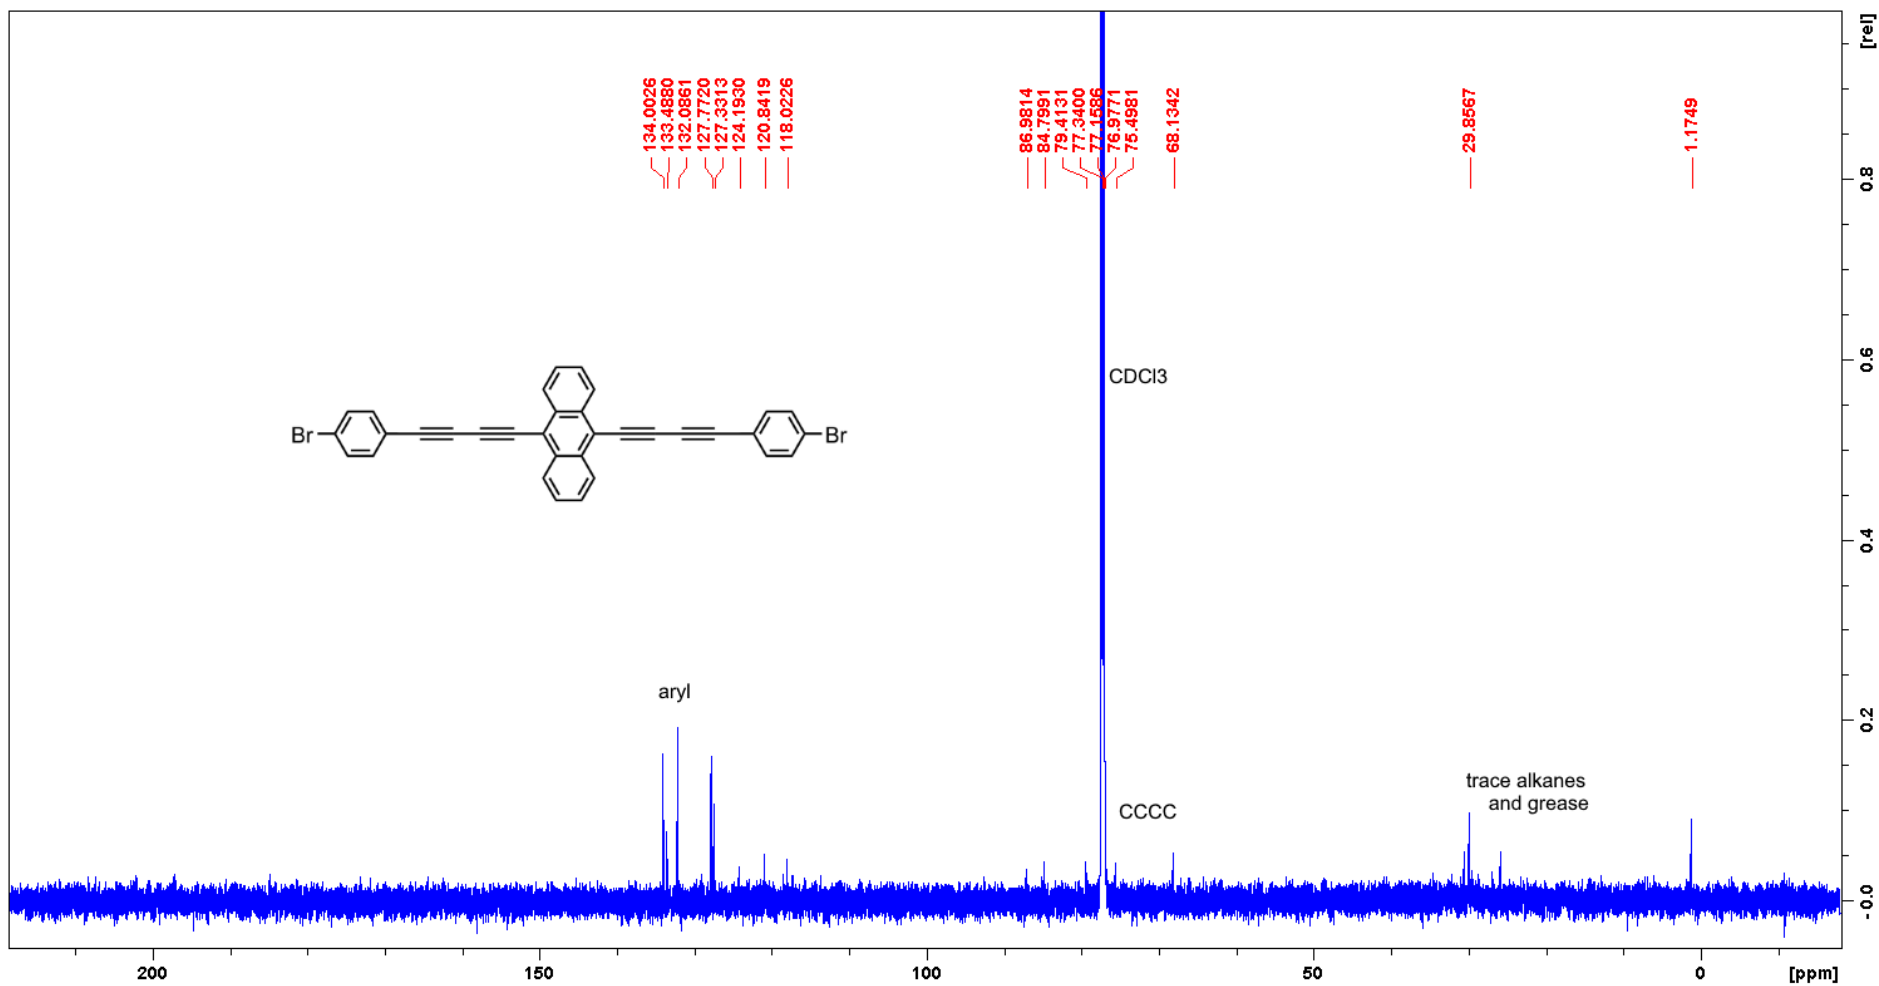

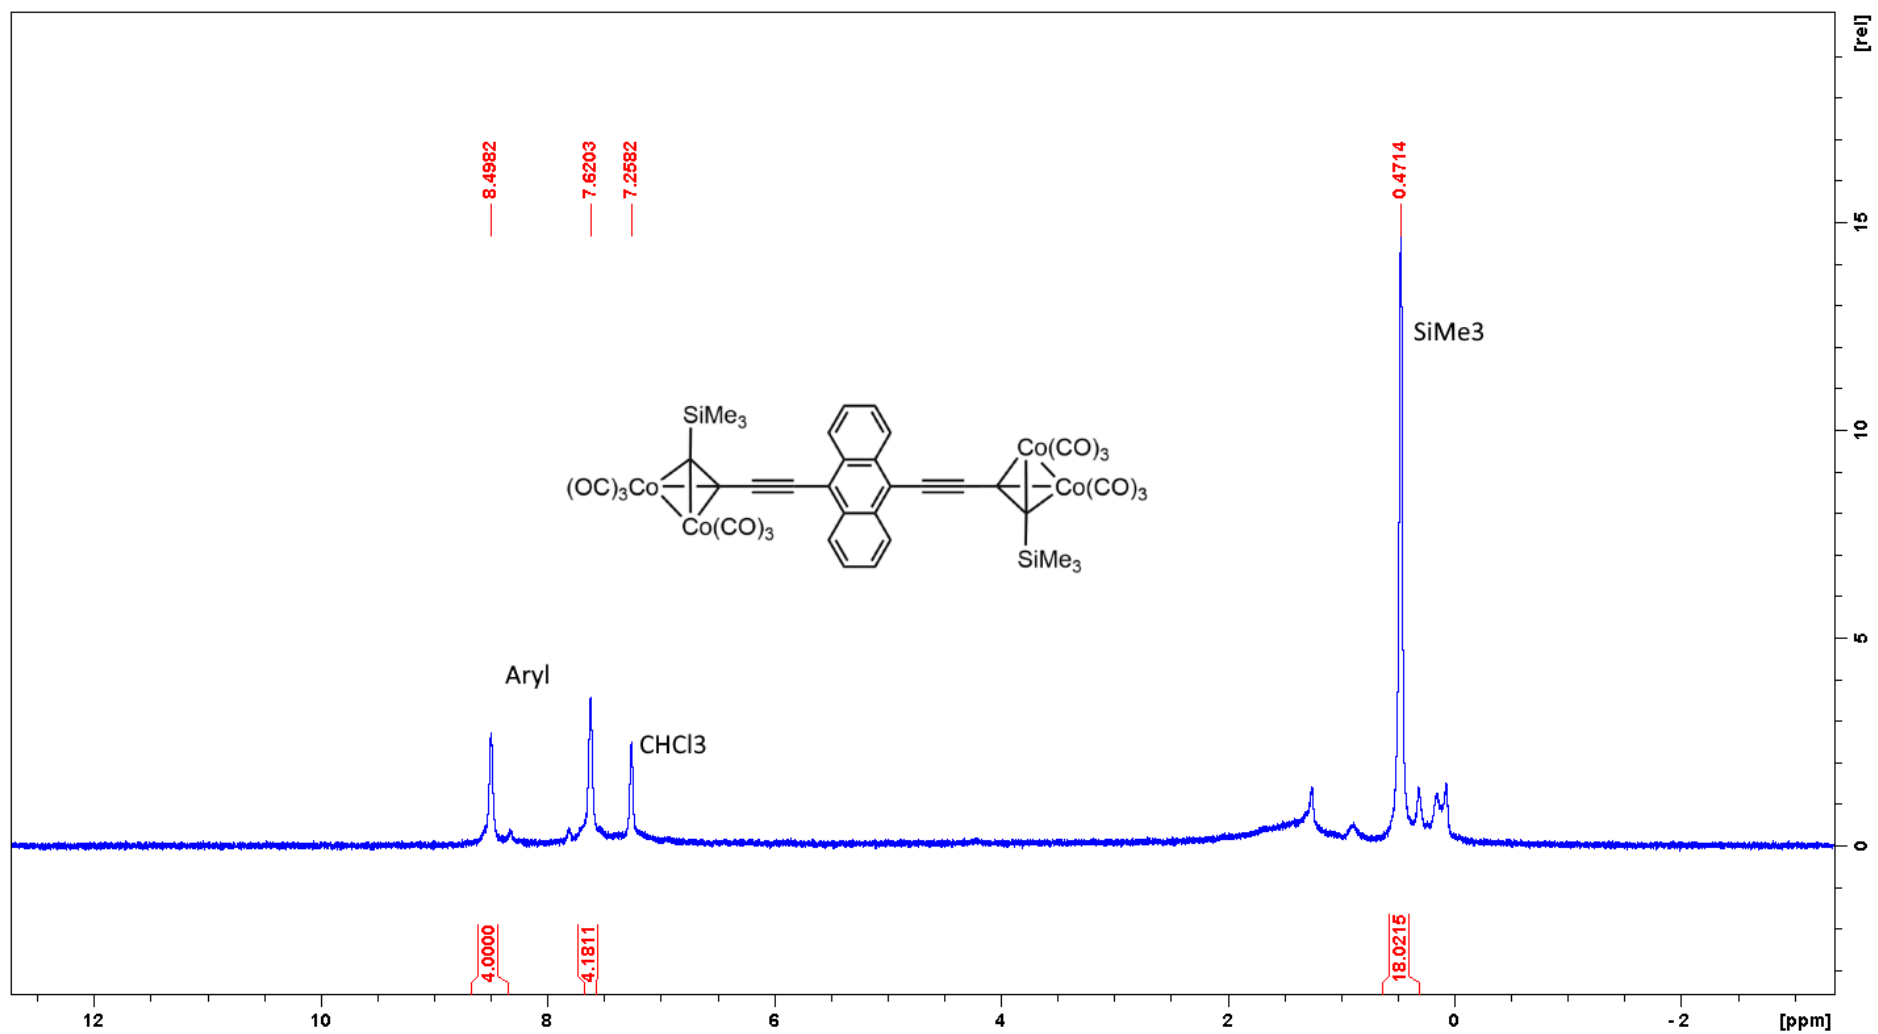

Figure S11.  $^1\text{H}$  NMR (700 MHz,  $\text{CDCl}_3$ ,  $25^\circ\text{C}$ ,  $\delta$ ) of the tetracobalt complex (7).

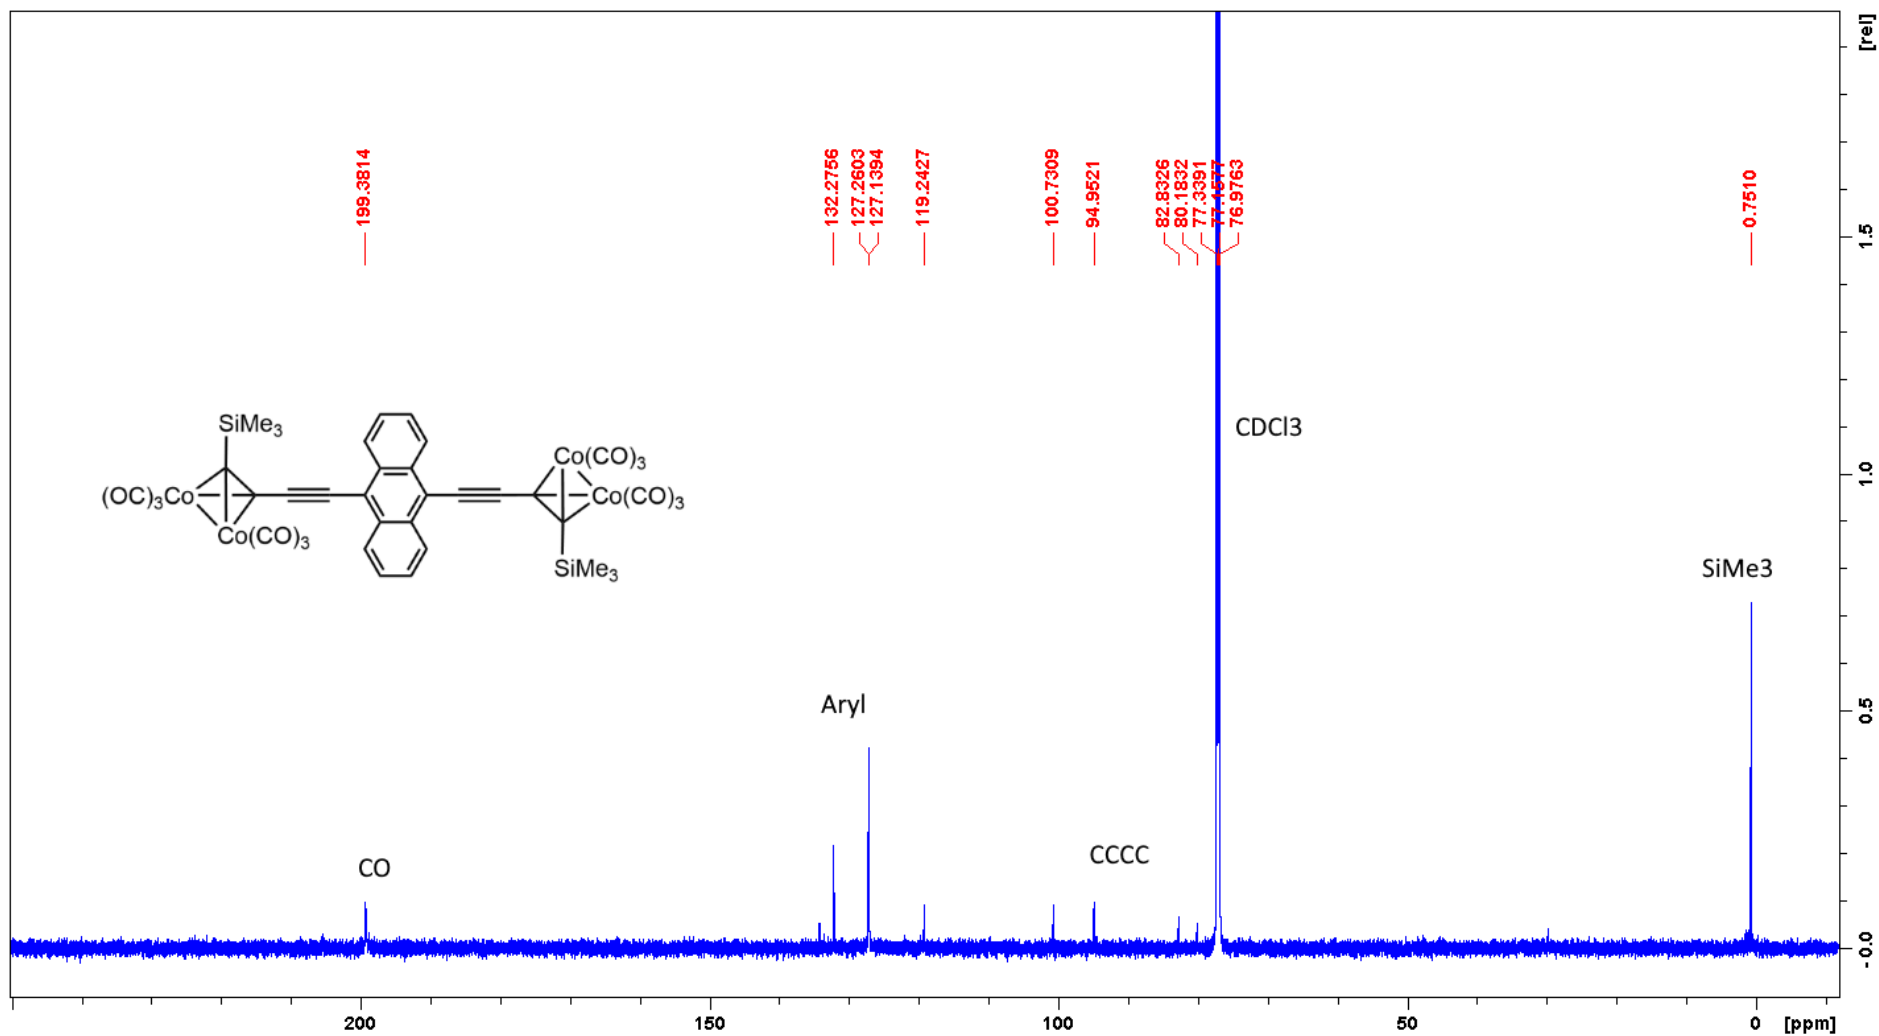

Figure S12.  $^{13}\text{C}\{^1\text{H}\}$  NMR (176 MHz,  $\text{CDCl}_3$ ,  $25^\circ\text{C}$ ,  $\delta$ ) of tetracobalt complex (7).

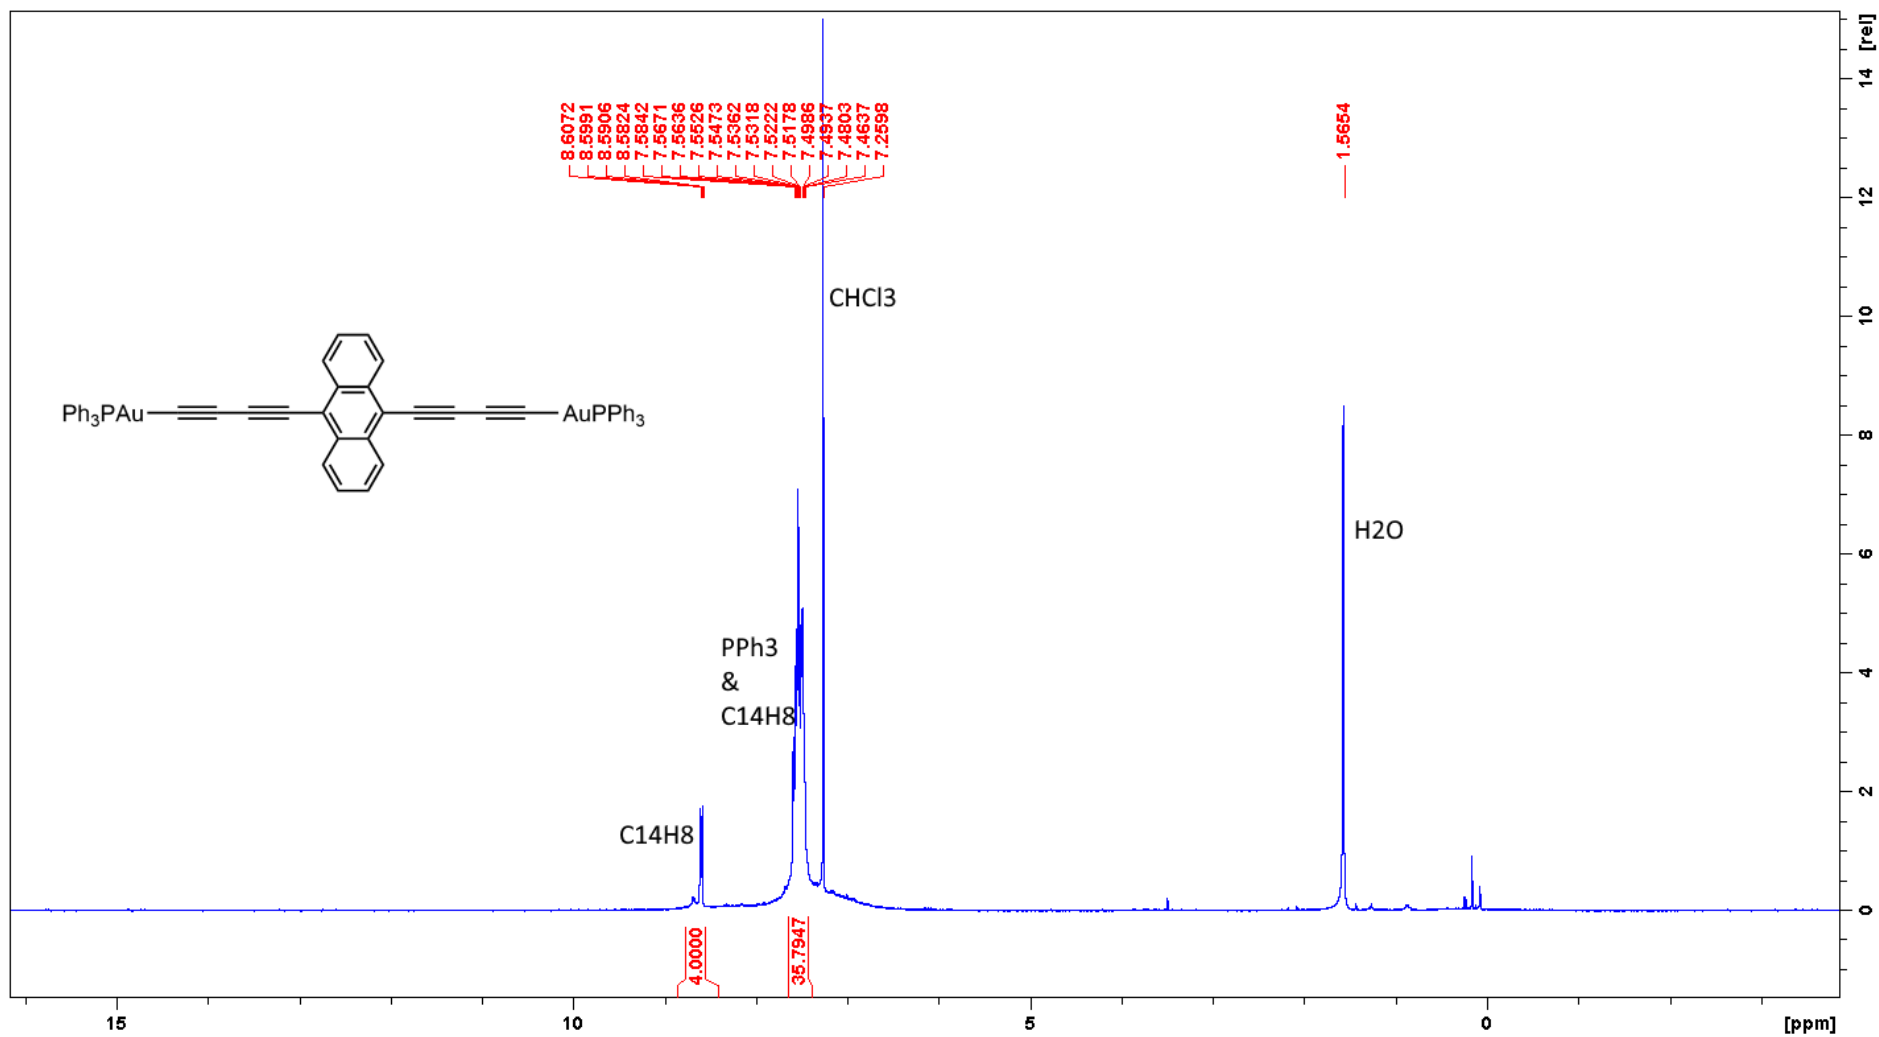

Figure S13.  $^1\text{H}$  NMR (700 MHz,  $\text{CDCl}_3$ ,  $25^\circ\text{C}$ ,  $\delta$ ) of 9,10-bis(triphenylphosphinegold-buta-1,3-diyne-1-yl)anthracene (8).

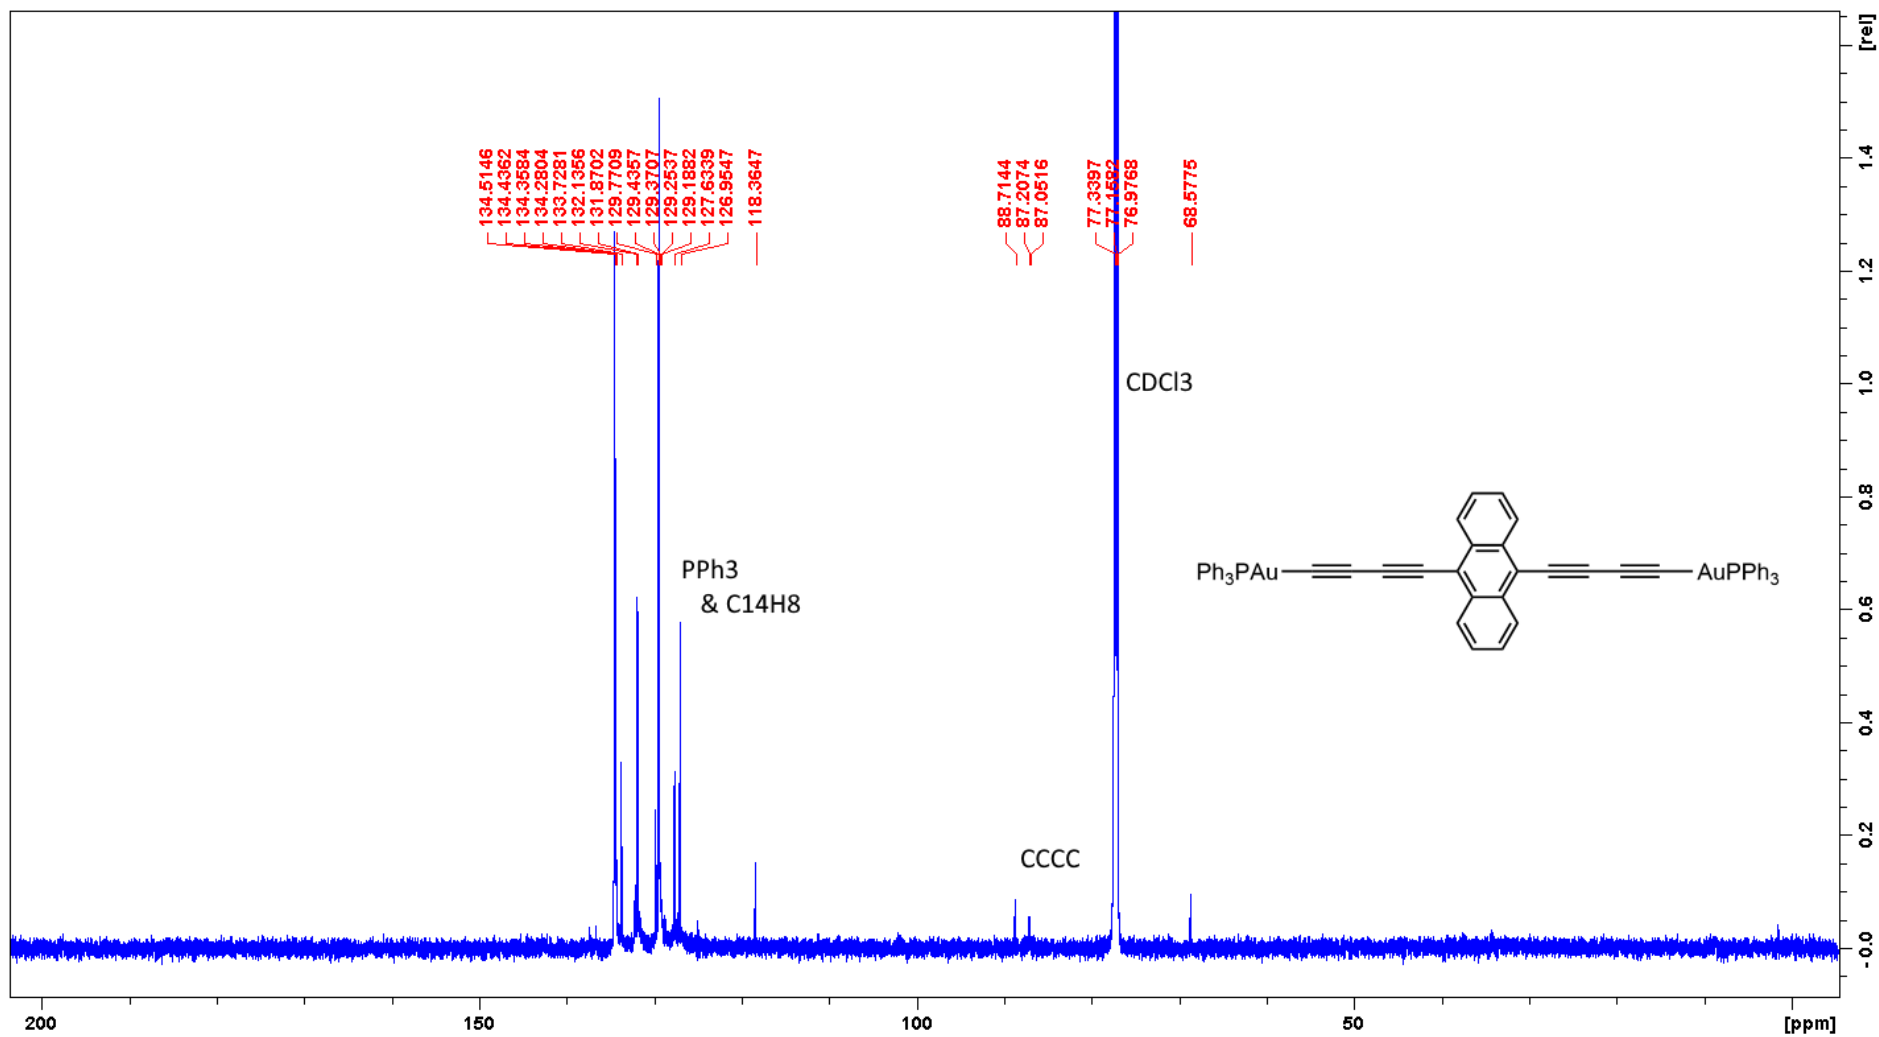

Figure S14.  $^{13}\text{C}\{^1\text{H}\}$  NMR (176 MHz,  $\text{CDCl}_3$ , 25°C,  $\delta$ ) of 9,10-bis(triphenylphosphinegold-buta-1,3-diyne-1-yl)anthracene (8).

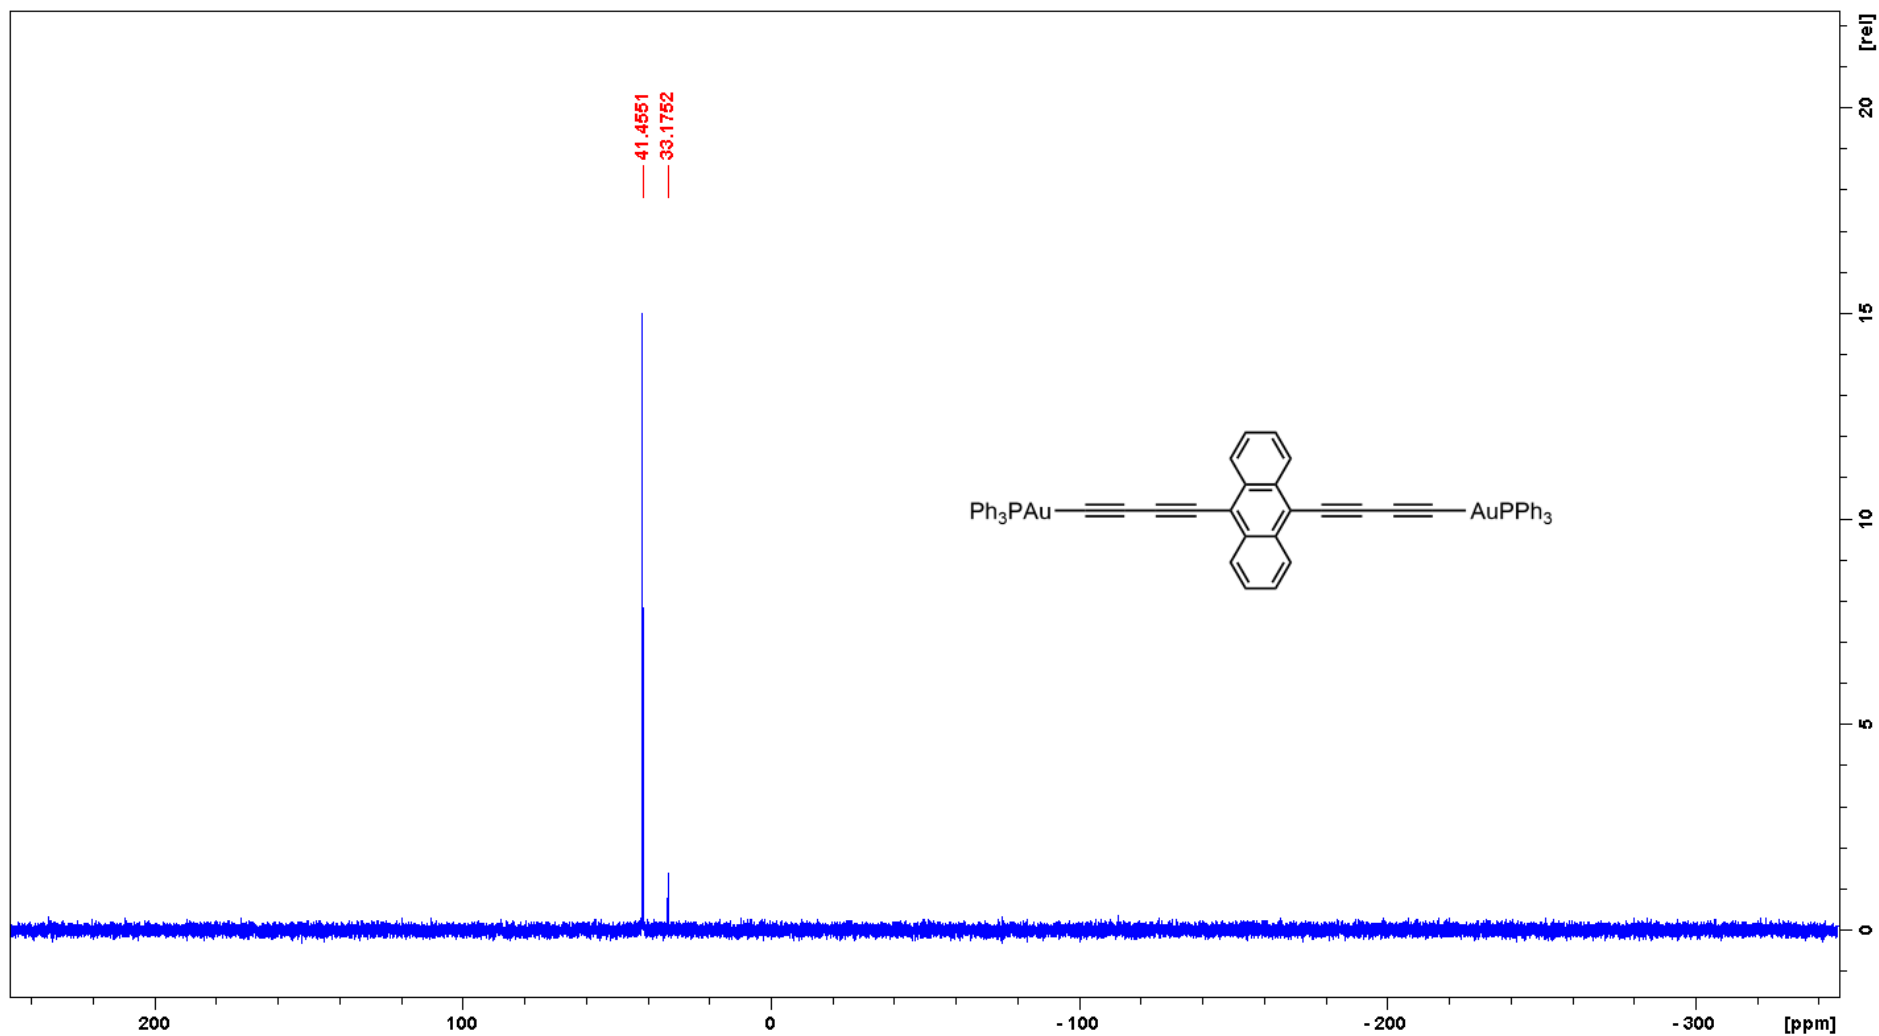

Figure S15.  $^{31}\text{P}\{^1\text{H}\}$  NMR (162 MHz,  $\text{CDCl}_3$ , 25°C,  $\delta$ ) of 9,10-bis(triphenylphosphinegold-buta-1,3-diyne-1-yl)anthracene (8).



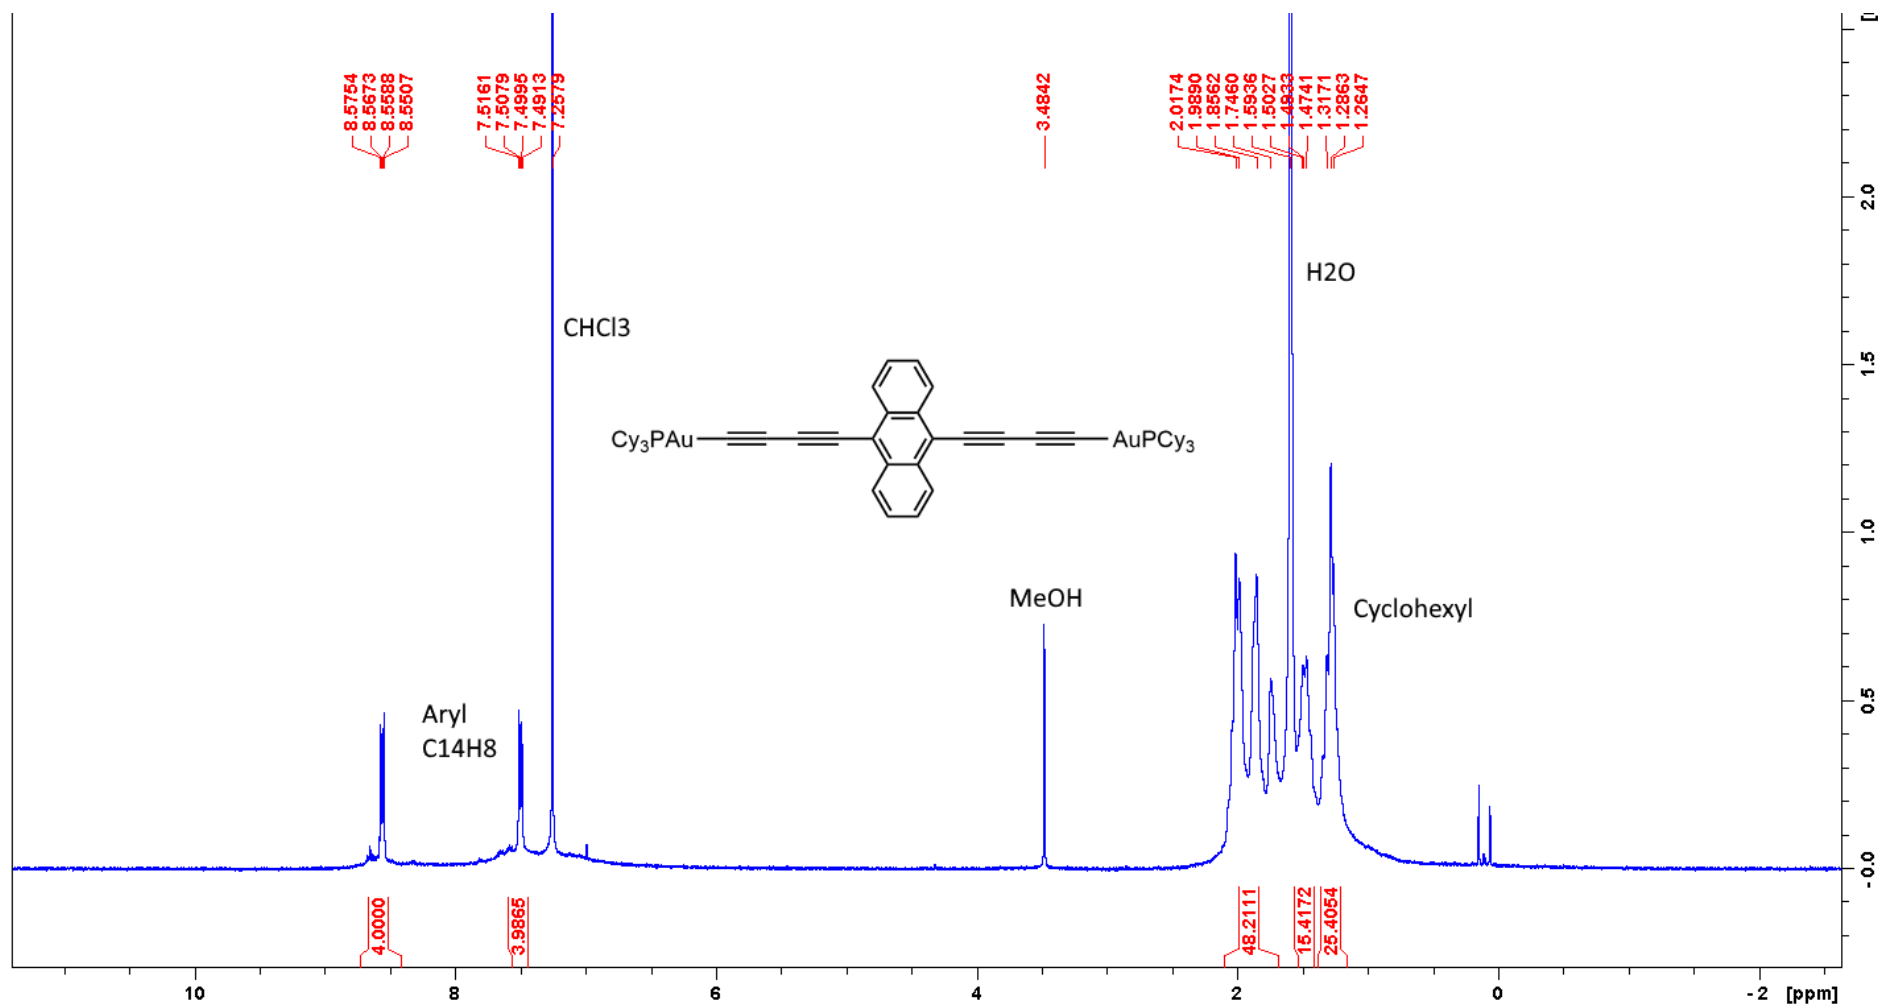

Figure S16.  $^1\text{H}$  NMR (700 MHz,  $\text{CDCl}_3$ , 25°C,  $\delta$ ) of 9,10-bis(tricyclohexylphosphinegold-buta-1,3-diyne-1-yl)anthracene (9).

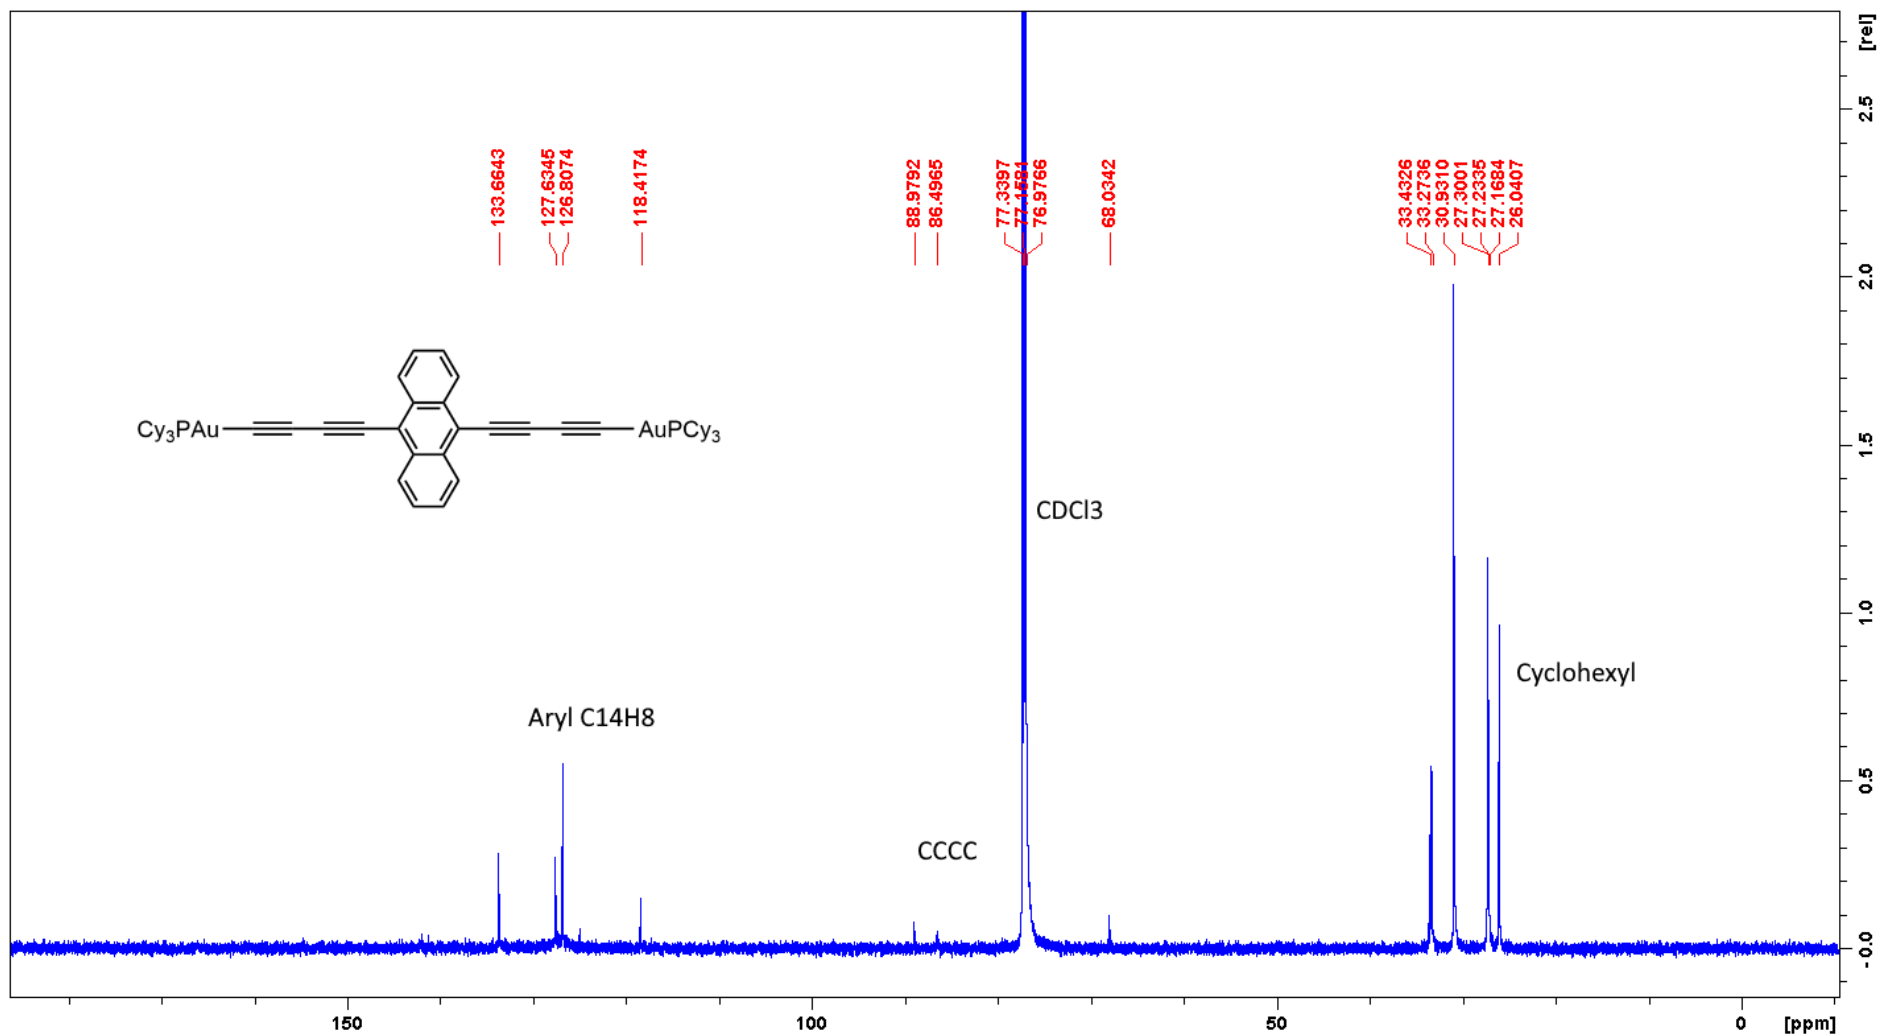

Figure S17.  $^{13}\text{C}\{^1\text{H}\}$  NMR (176 MHz, CDCl<sub>3</sub>, 25 °C,  $\delta$ ) of 9,10-bis(tricyclohexylphosphinegold-buta-1,3-diyne-1-yl)anthracene (9).

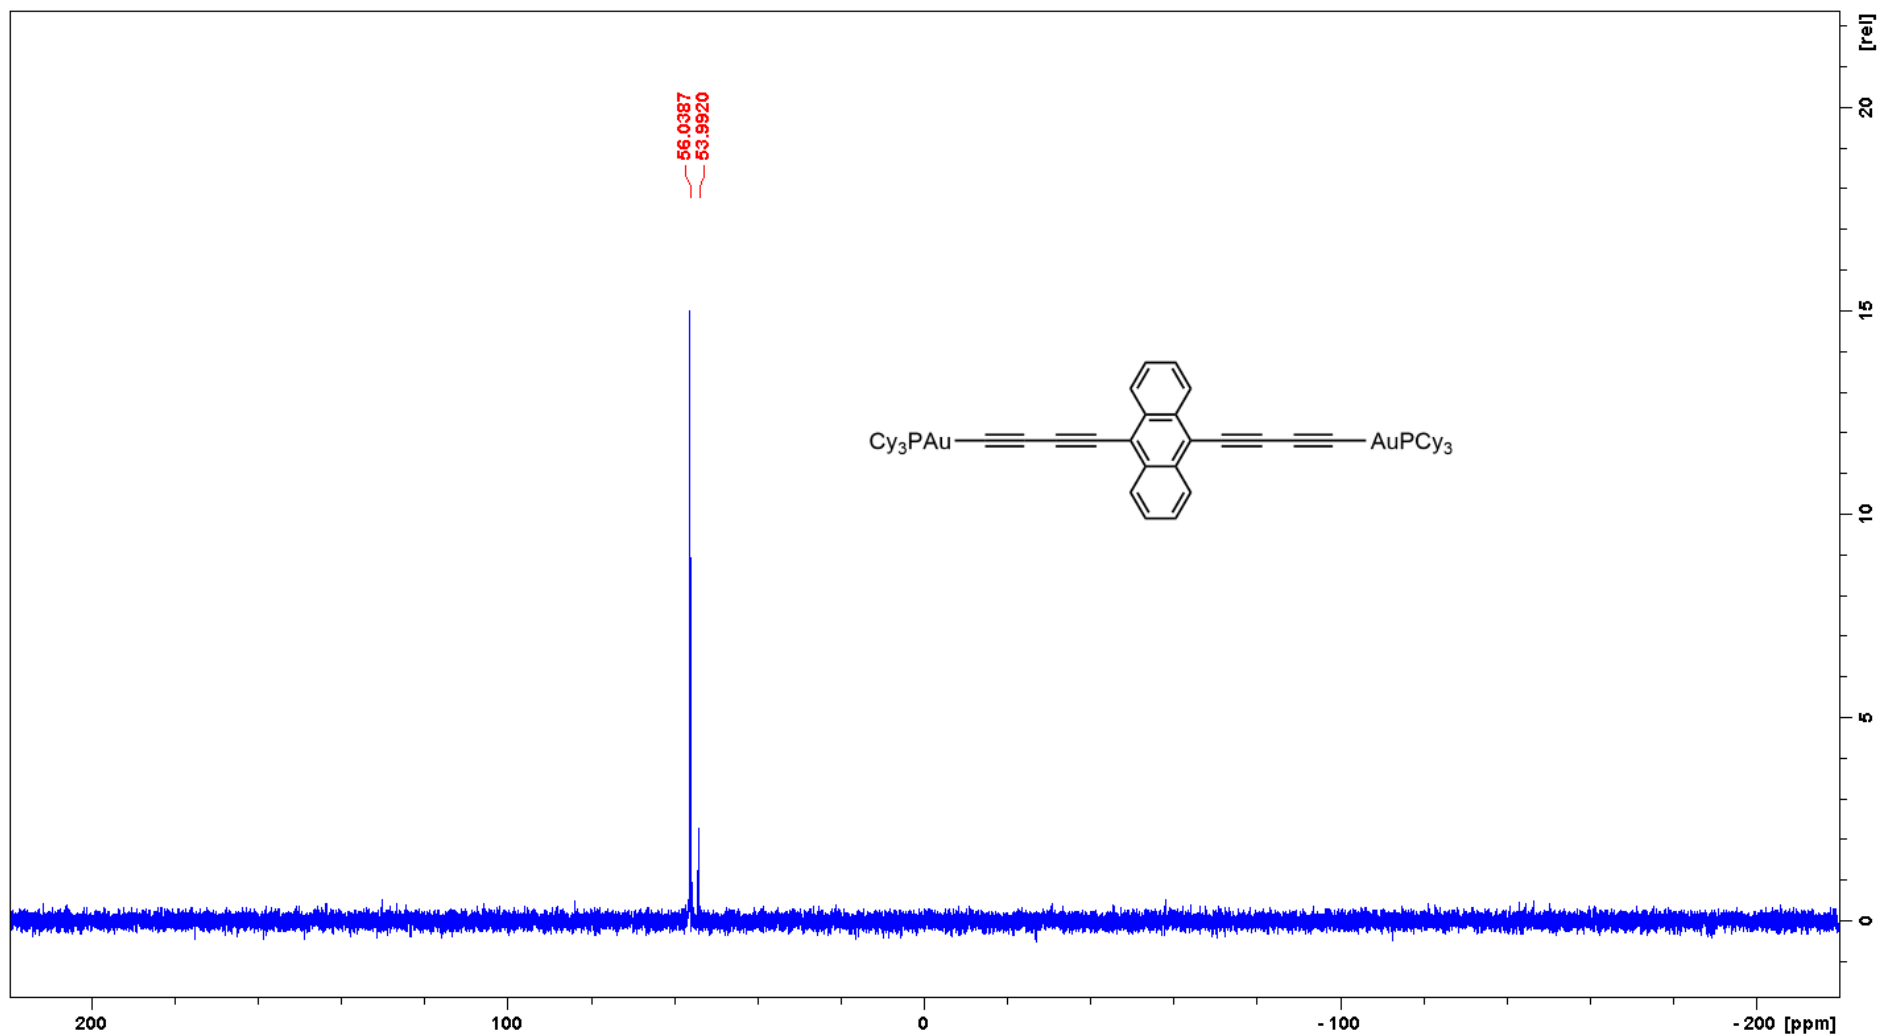

Figure S18.  $^{31}\text{P}\{^1\text{H}\}$  NMR (162 MHz,  $\text{CDCl}_3$ , 25°C,  $\delta$ ) of 9,10-bis(tricyclohexylphosphinegold-buta-1,3-diyne-1-yl)anthracene (9).

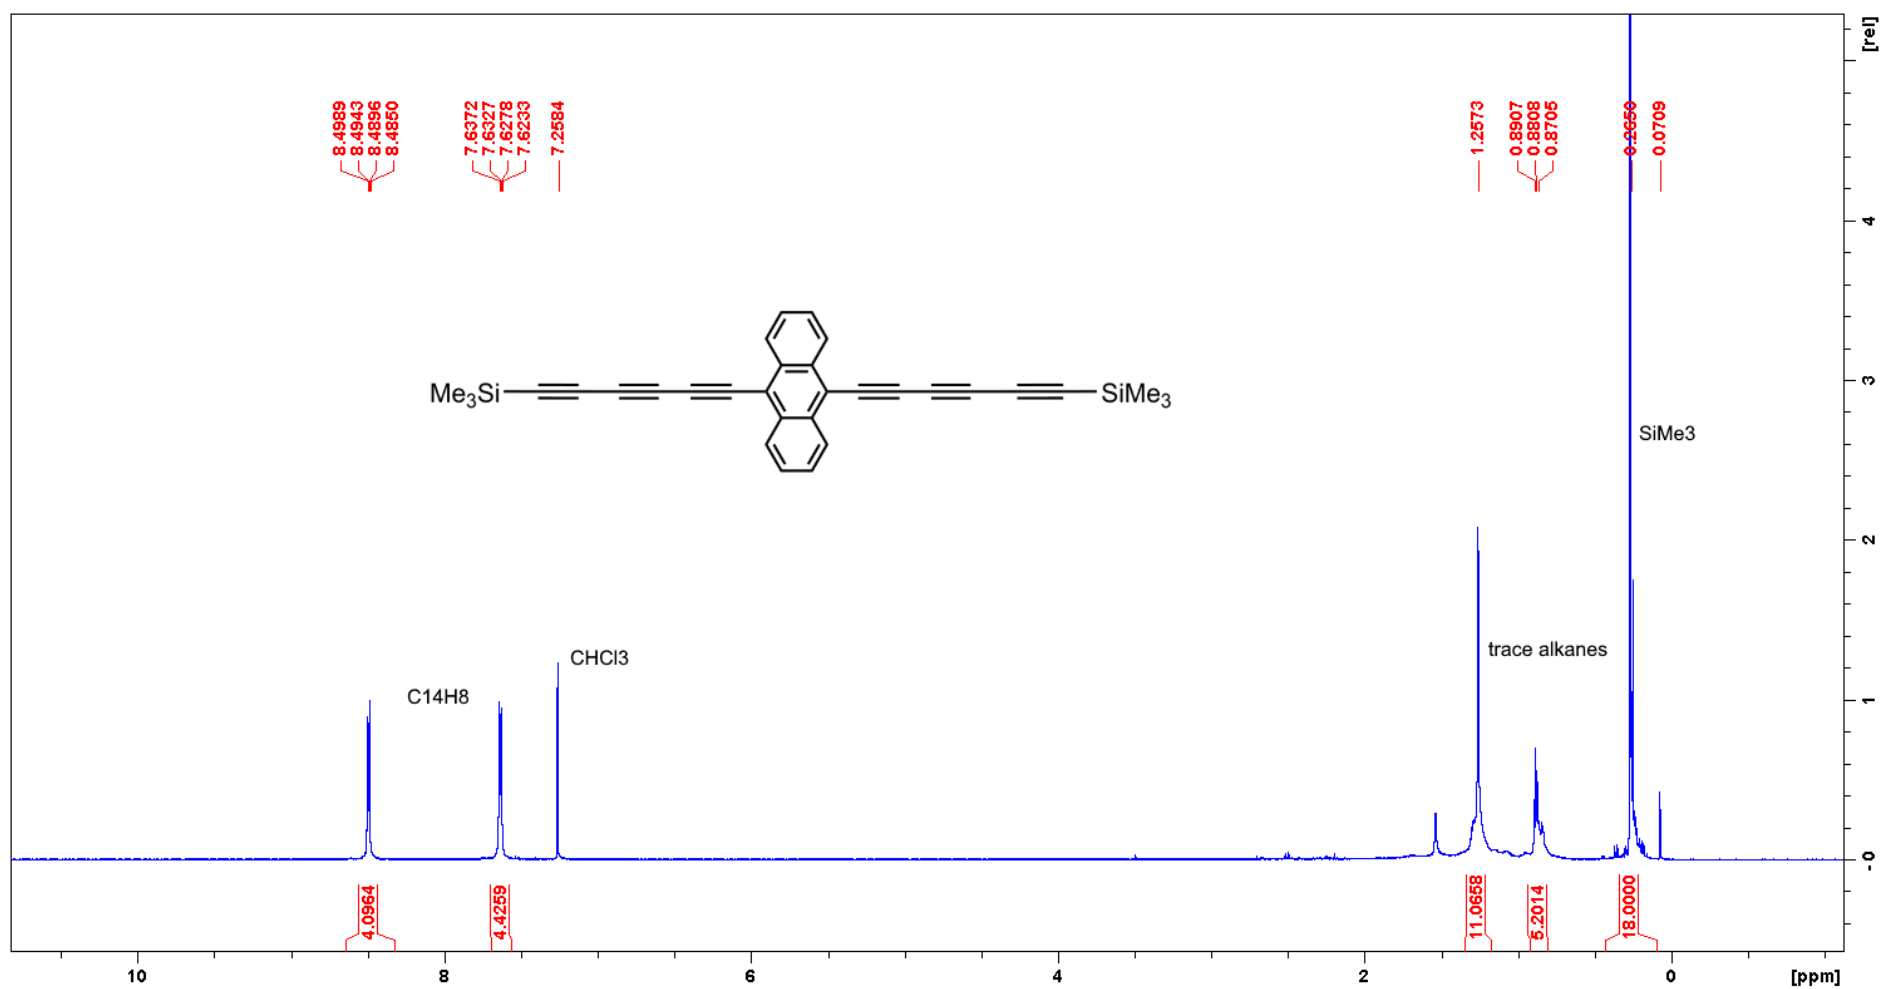

Figure S19. <sup>1</sup>H NMR (700 MHz, CDCl<sub>3</sub>, 25°C, δ) of 9,10-bis(trimethylsilyl)hexa-1,3,5-triyn-1-ylanthracene (10).

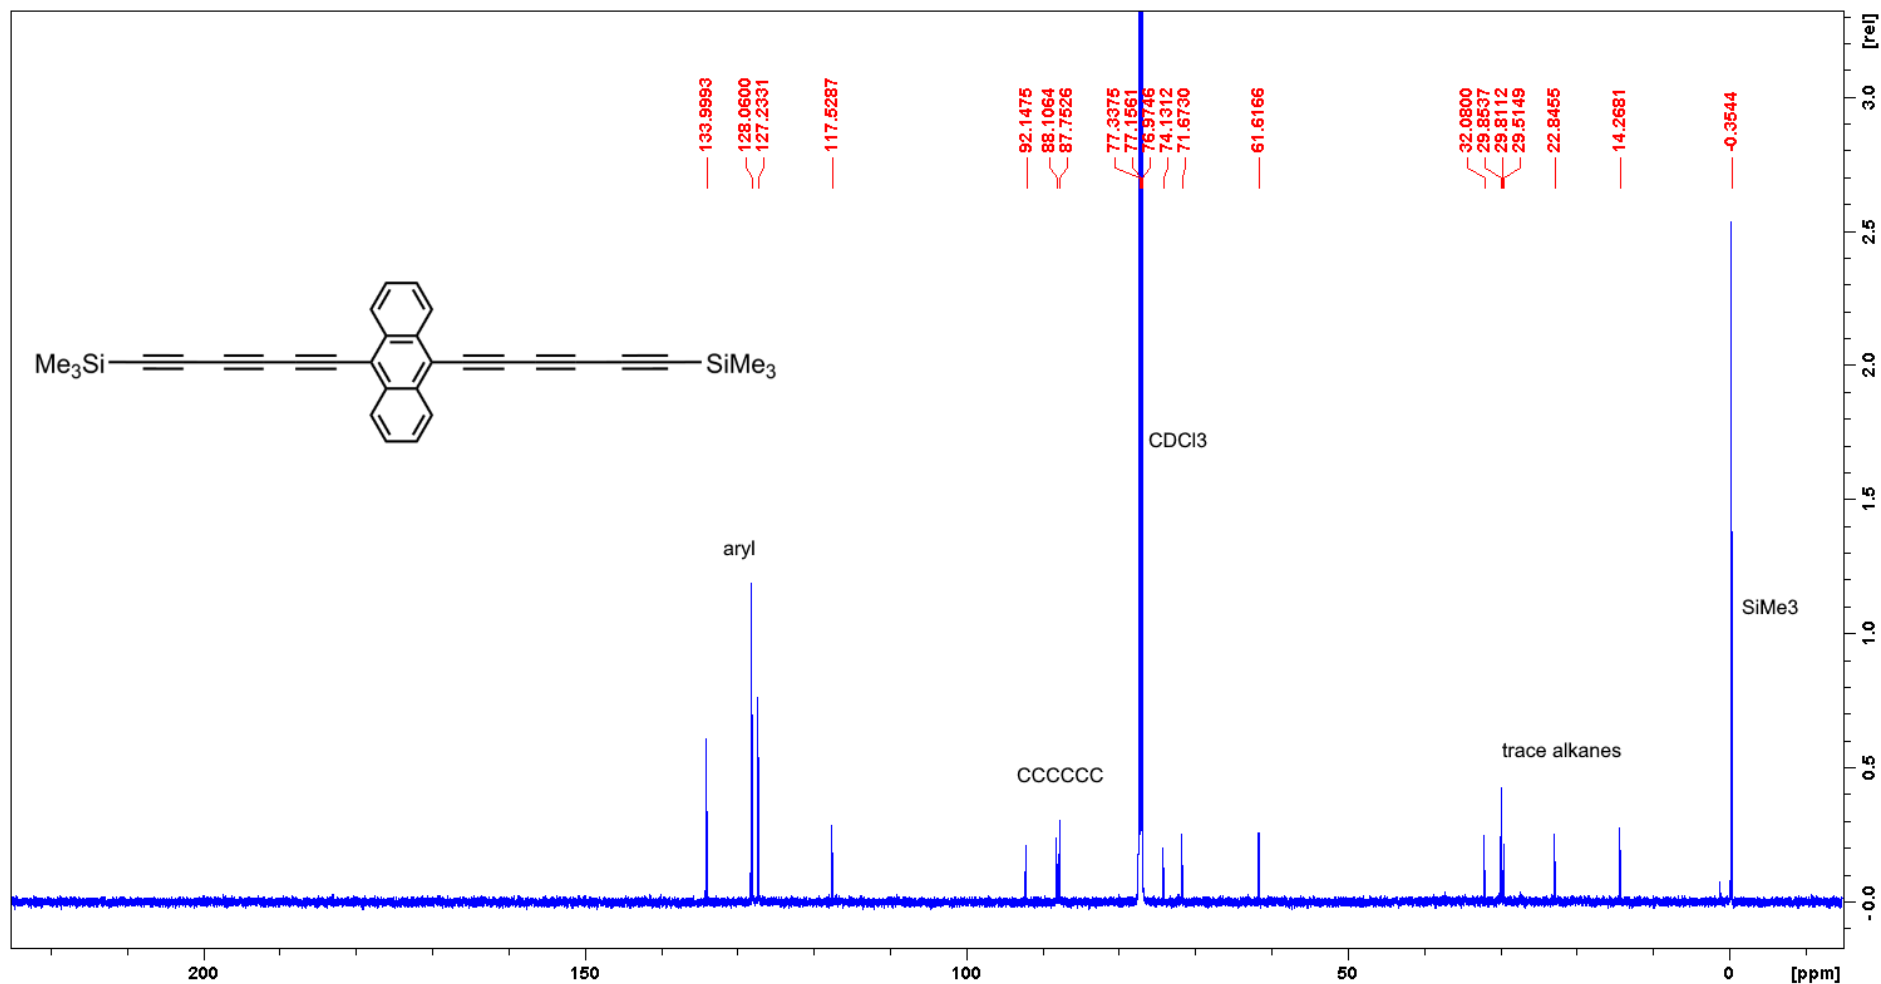

Figure S20.  $^{13}\text{C}$  NMR (176 MHz,  $\text{CDCl}_3$ , 25°C,  $\delta$ ) of 9,10-bis(trimethylsilyl)hexa-1,3,5-triyn-1-ylanthracene (10).

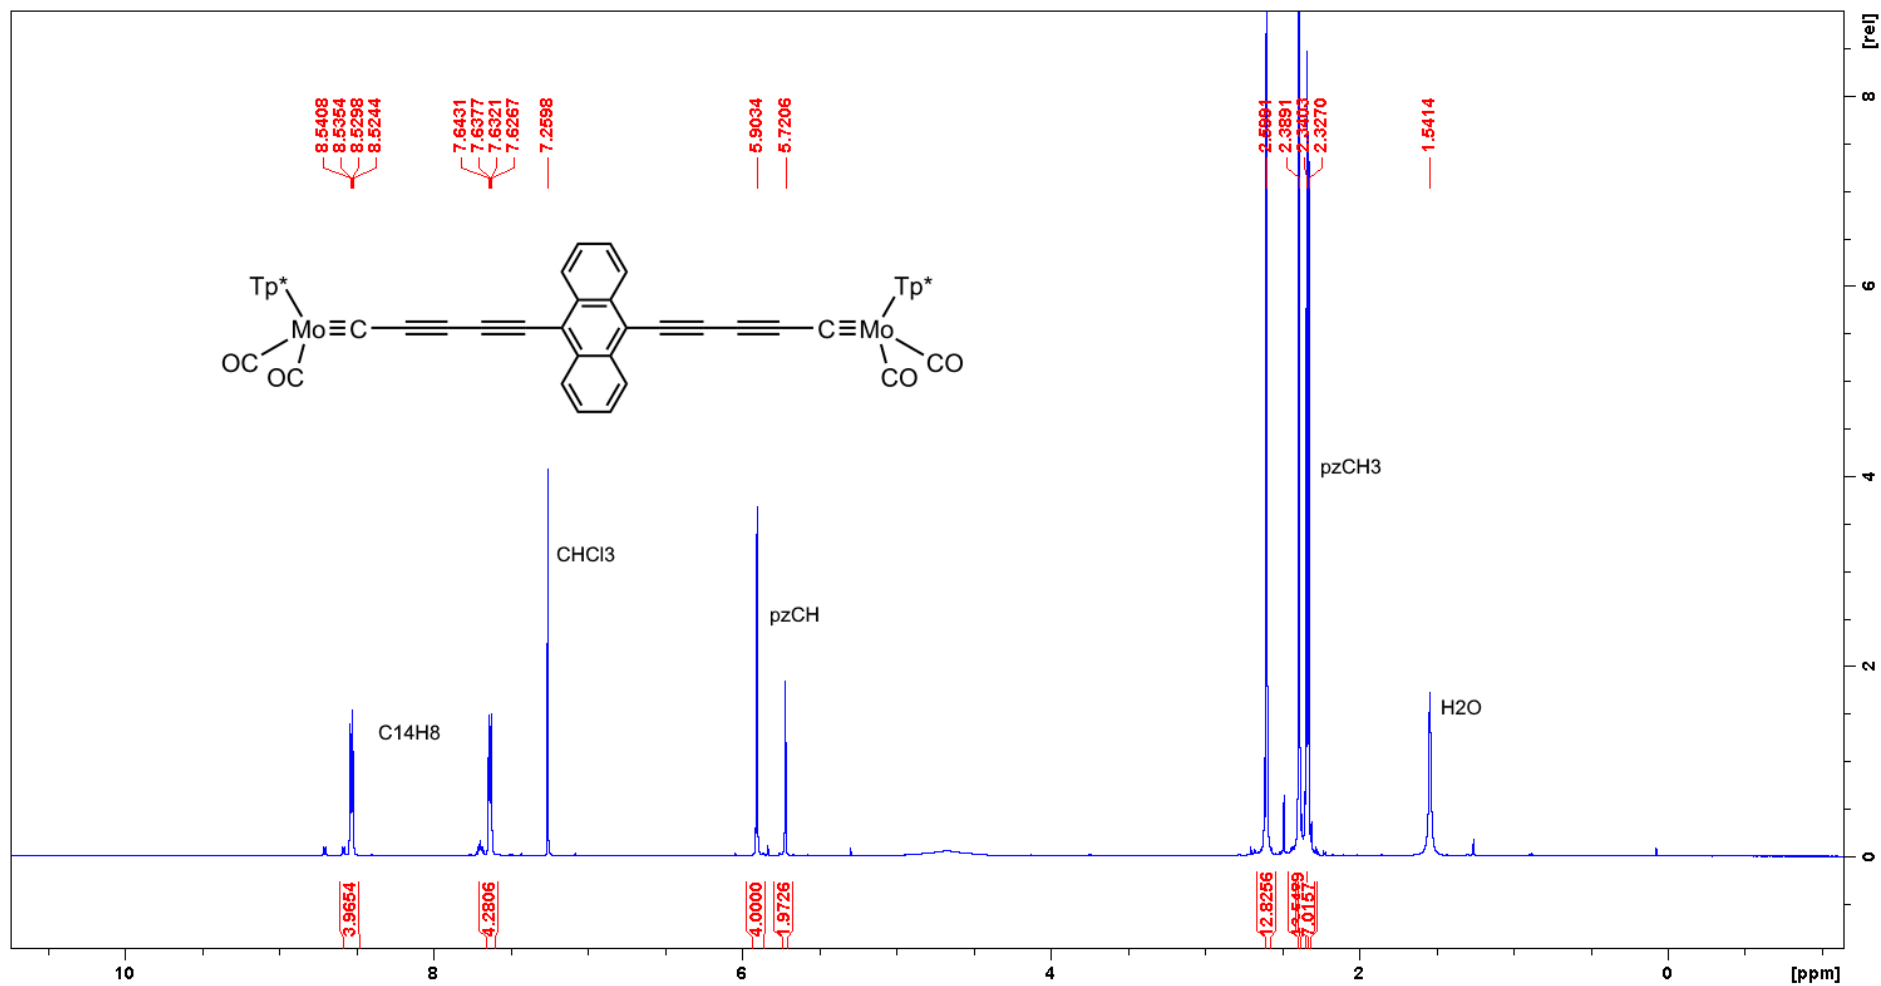

Figure S21.  $^1\text{H}$  NMR (700 MHz,  $\text{CDCl}_3$ ,  $25^\circ\text{C}$ ,  $\delta$ ) of  $[9,10-((\text{Tp}^*)(\text{CO})_2\text{Mo}\equiv\text{CC}\equiv\text{C})\text{C}_{14}\text{H}_8]$  (11).

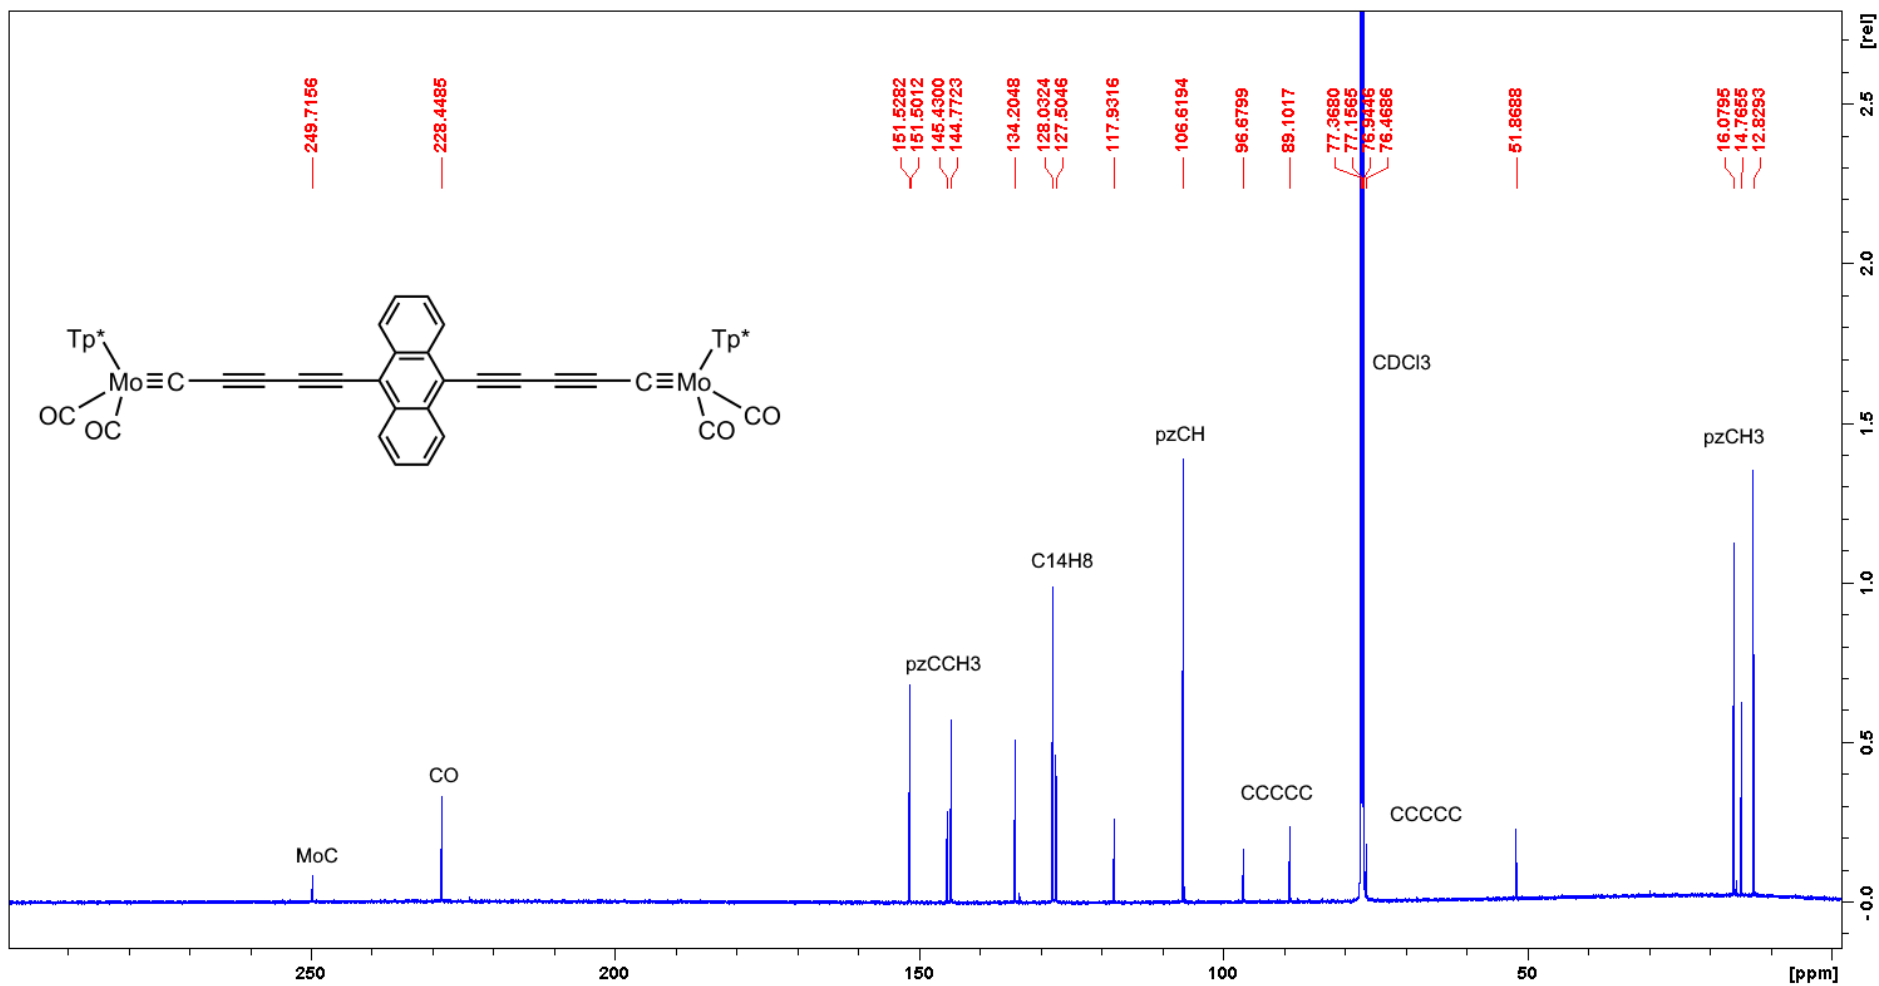

Figure S22. <sup>13</sup>C{<sup>1</sup>H} NMR (176 MHz, CDCl<sub>3</sub>, 25 °C, δ) of [9,10-((Tp\*)(CO)<sub>2</sub>)Mo≡CC≡CC<sub>4</sub>H<sub>8</sub>] (11).

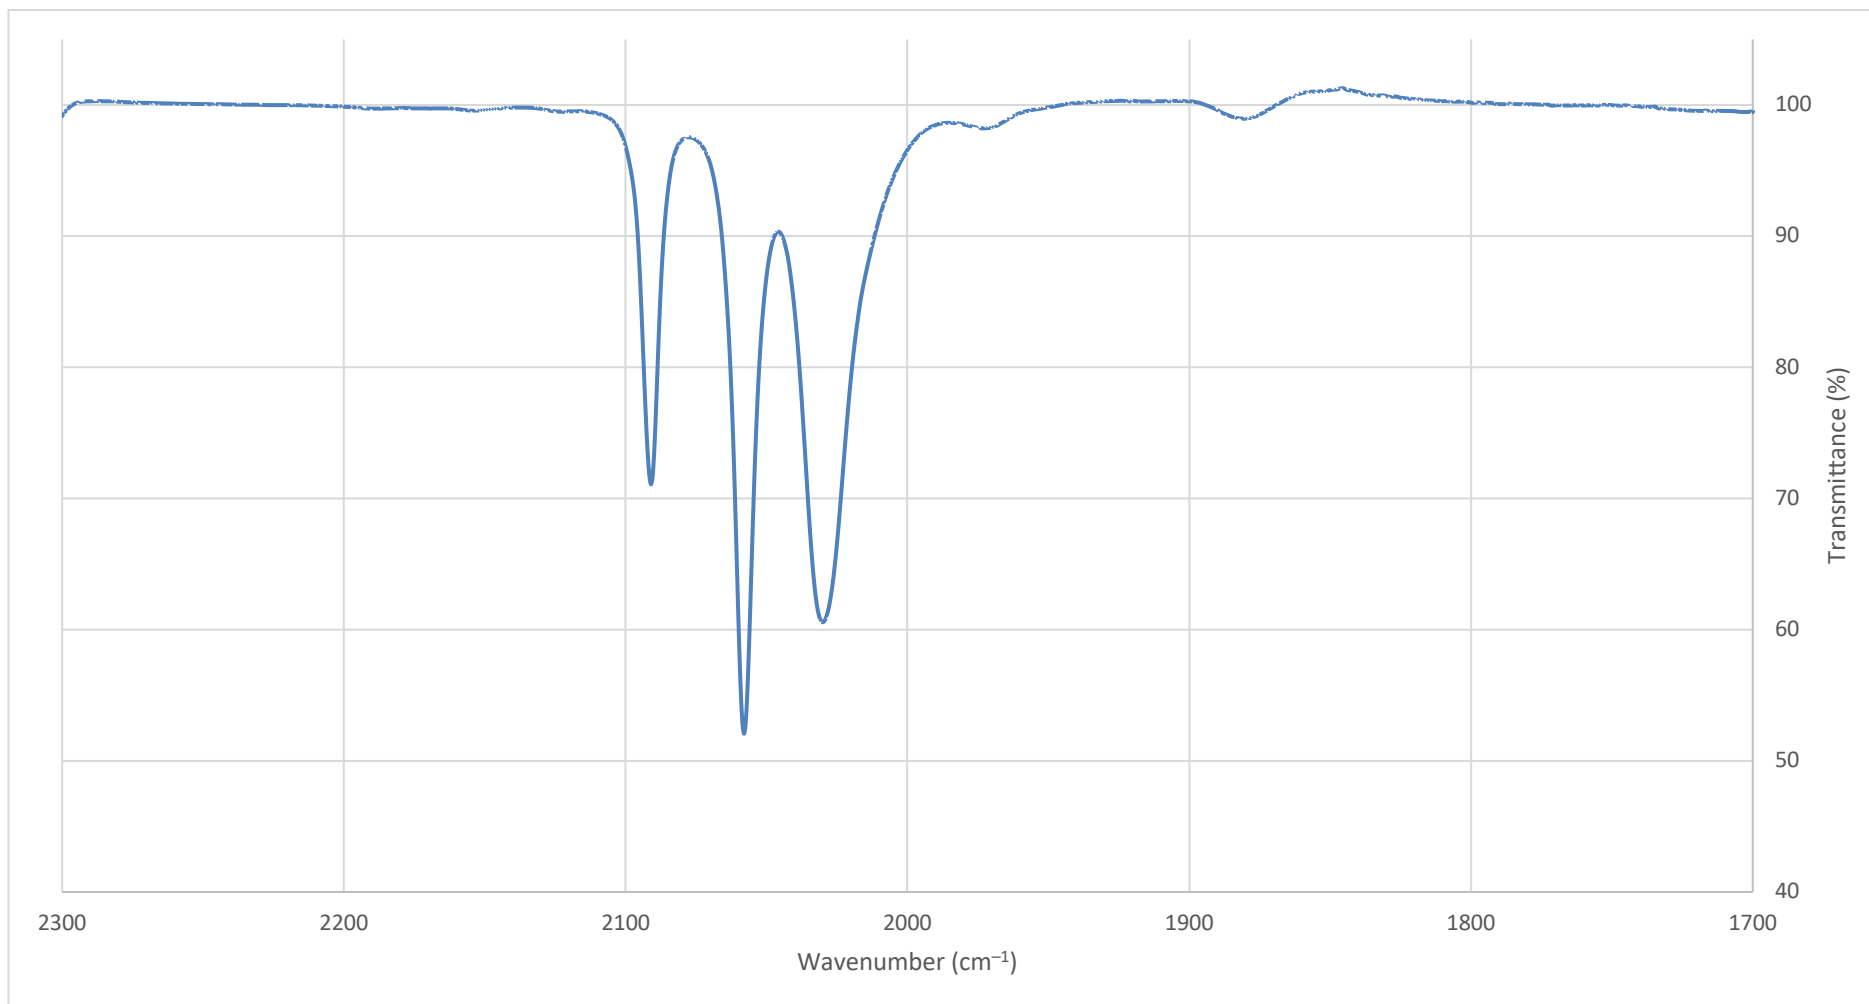

**Figure S23.** Infrared spectrum (CH<sub>2</sub>Cl<sub>2</sub>, cm<sup>-1</sup>) of the tetracobalt complex 5.



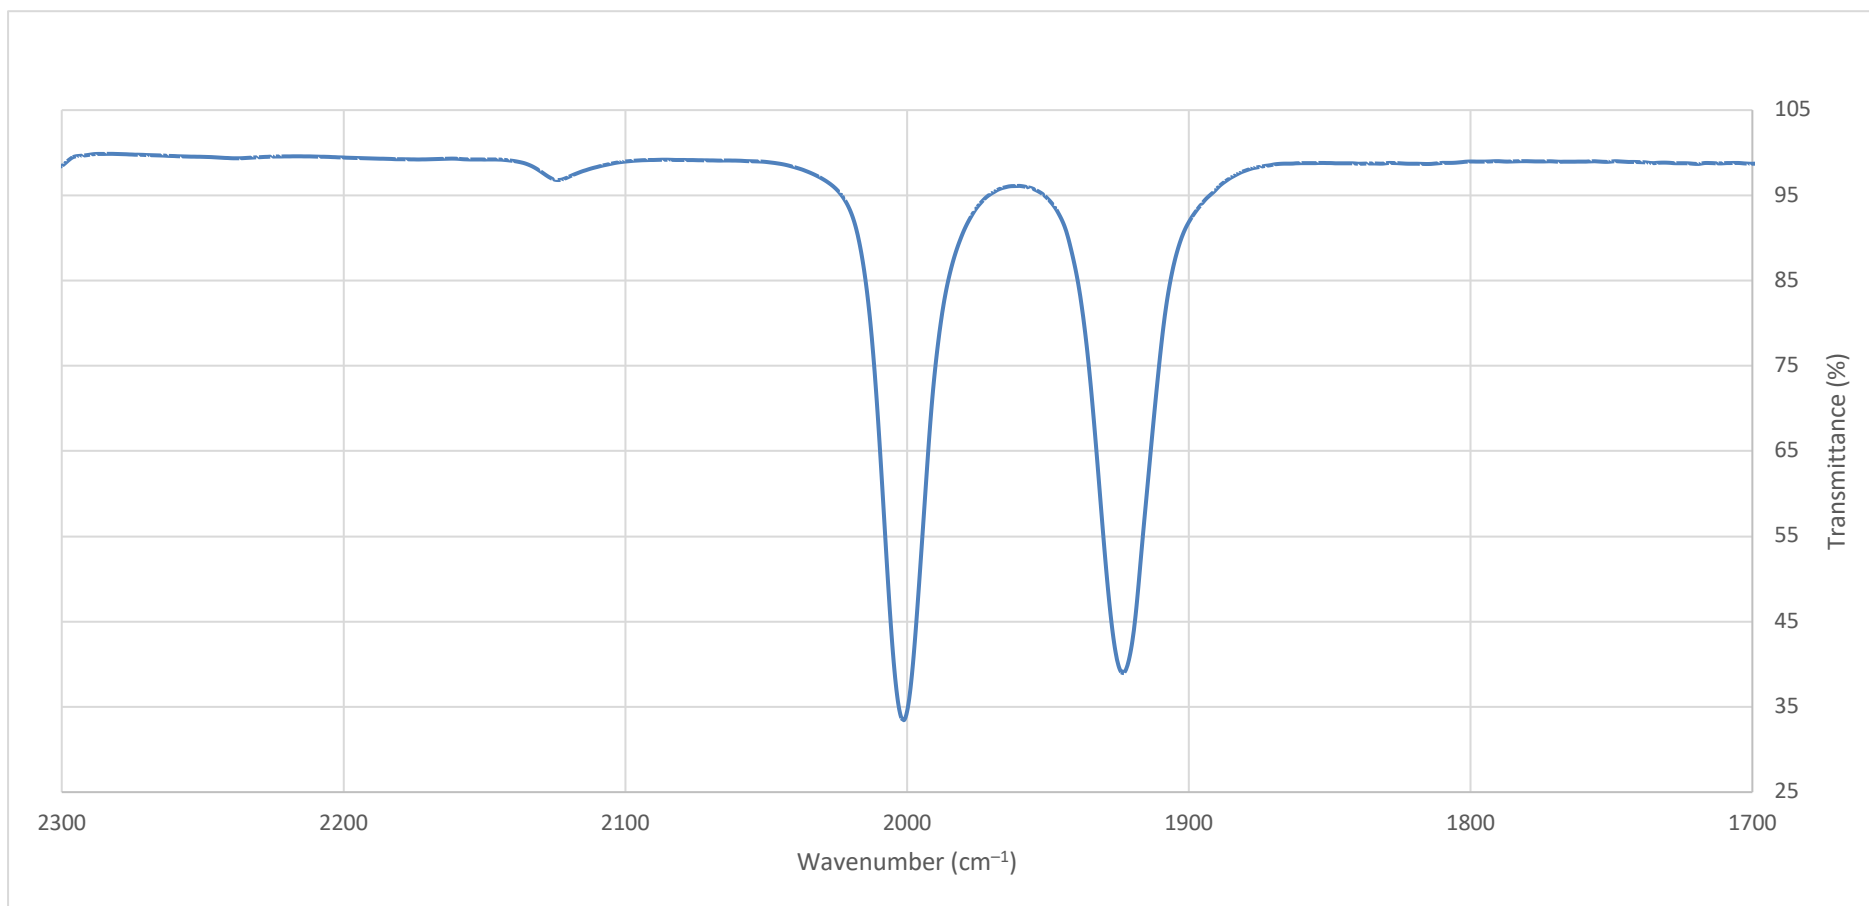

**Figure S24.** Infrared spectrum ( $\text{CH}_2\text{Cl}_2$ ,  $\text{cm}^{-1}$ ) of [9,10- $\{(\text{Tp}^*)\}(\text{CO})_2\text{Mo}\equiv\text{CC}\equiv\text{CC}\equiv\text{C}\}\text{C}_{14}\text{H}_8$ ] (**11**).

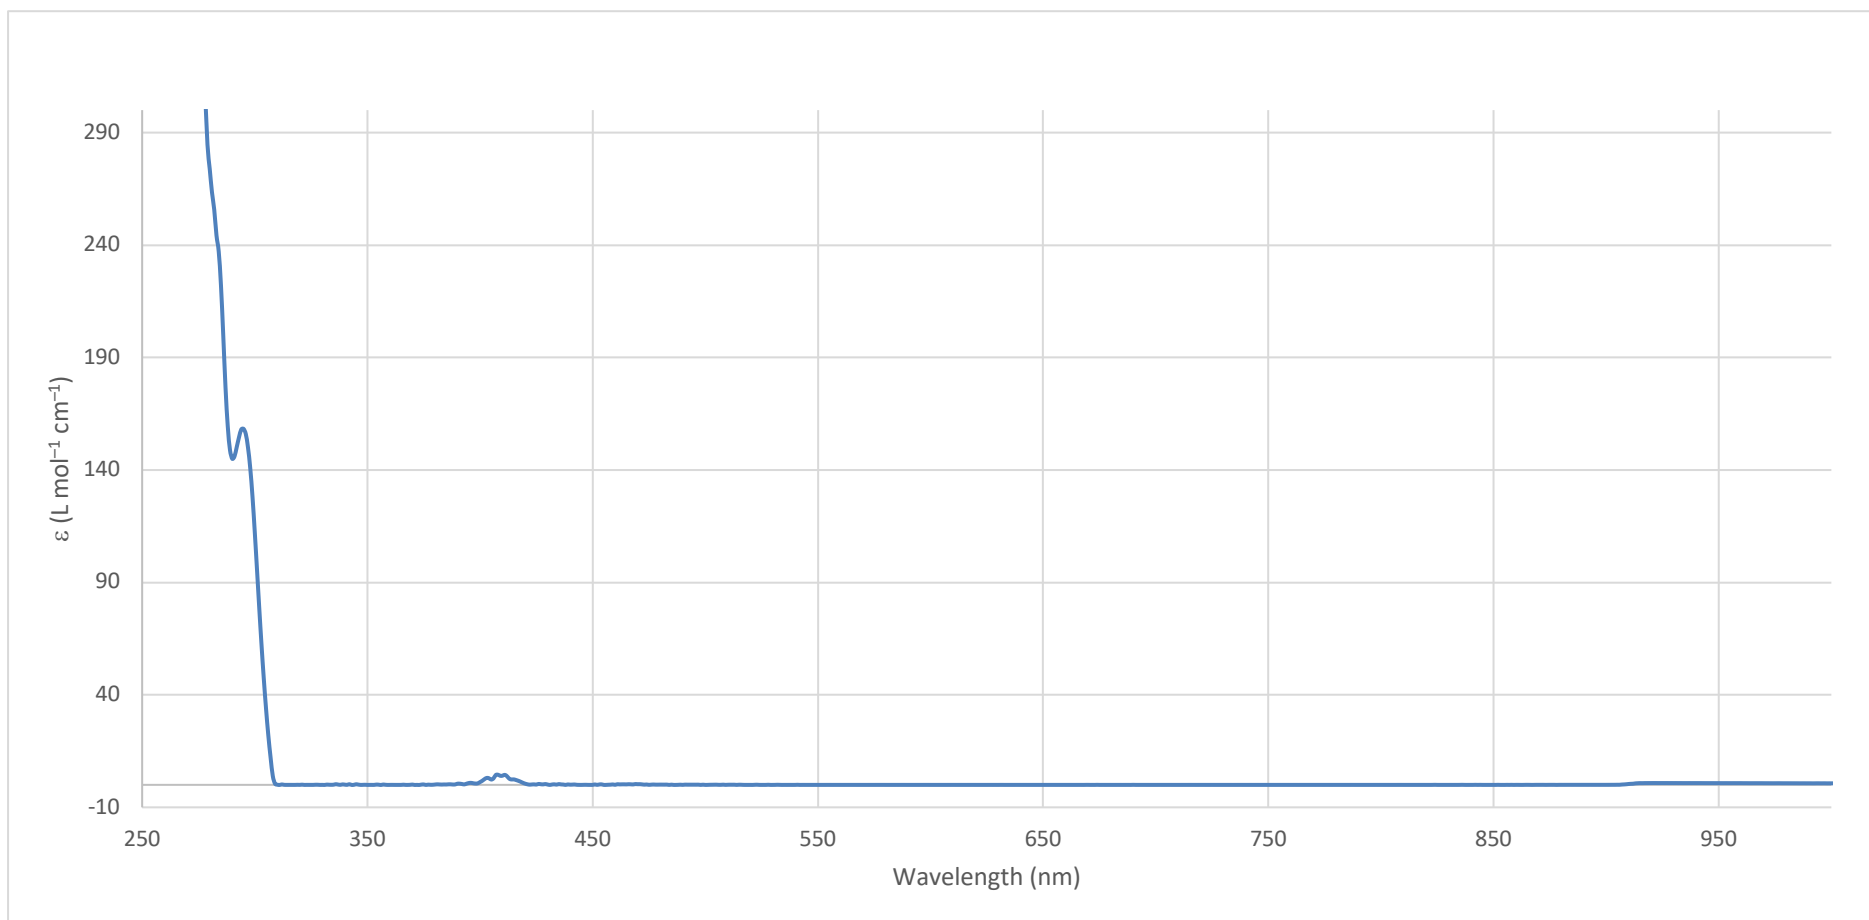

Figure S25. Electronic spectrum (CH<sub>2</sub>Cl<sub>2</sub>) of *anti*-9,10-dimethoxy-9,10-bis(trimethylsilyl)but-1,3-diyne-1-yl)dihydroanthracene (**2**).

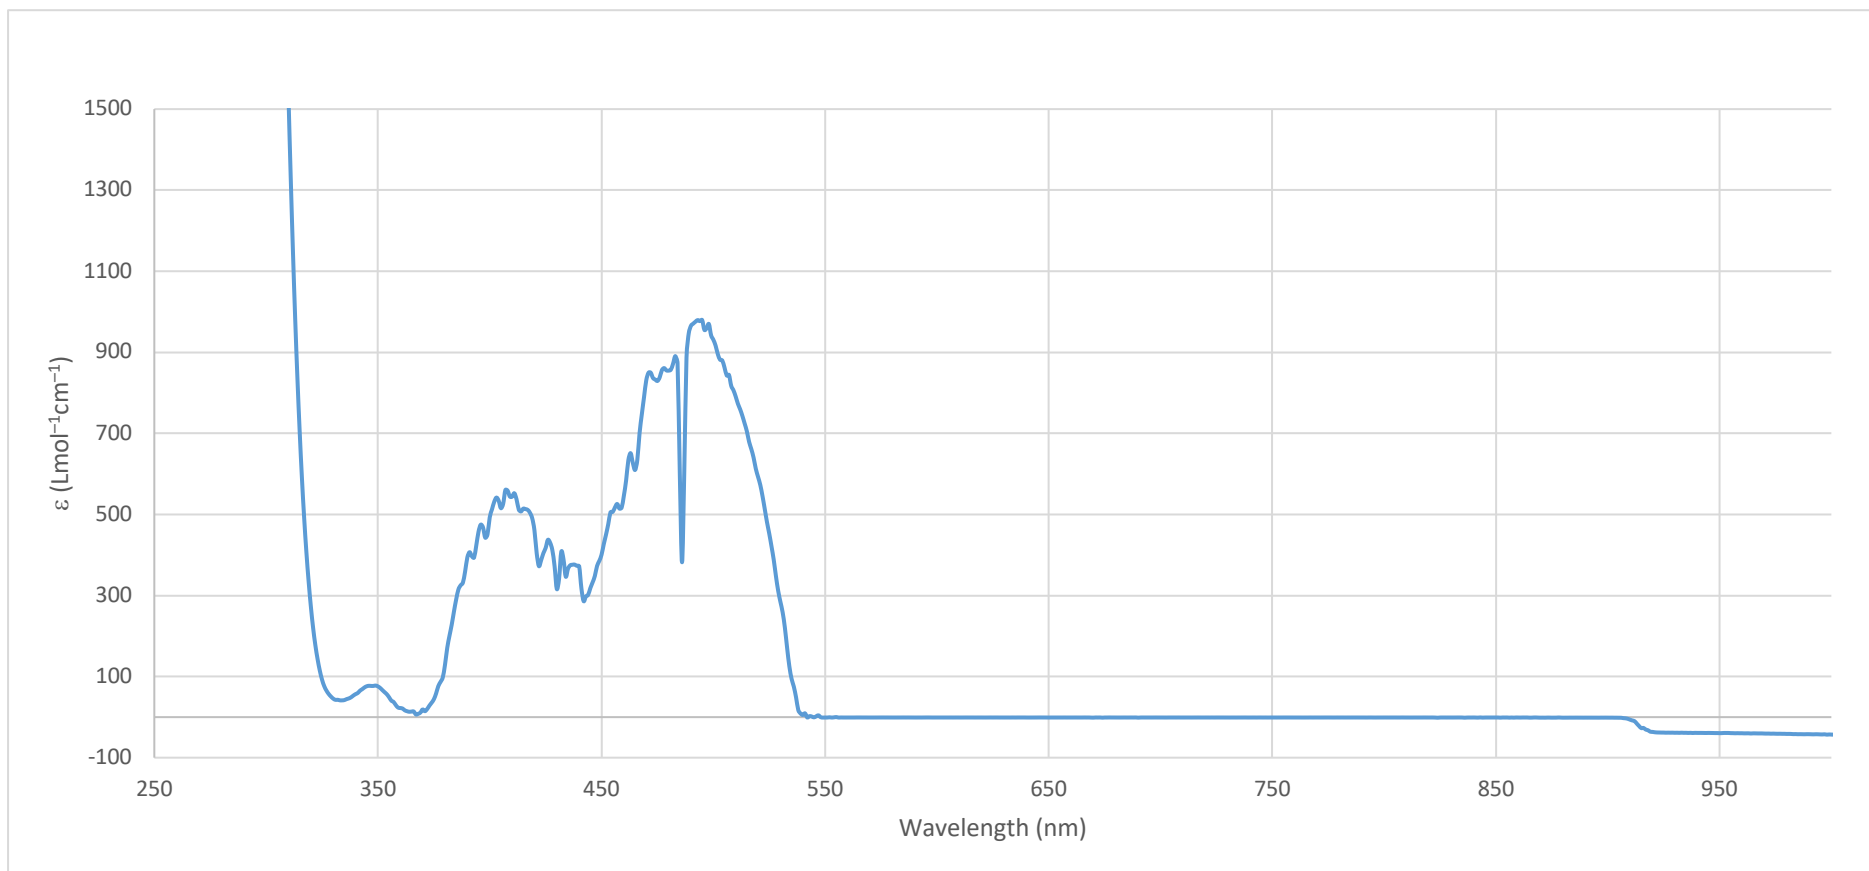

**Figure S26.** Electronic spectrum (CH<sub>2</sub>Cl<sub>2</sub>) of 10-hydroxy-10-(trimethylsilylbuta-1,3-dien-1-yl)anthracen-9(10H)-one (**3**).

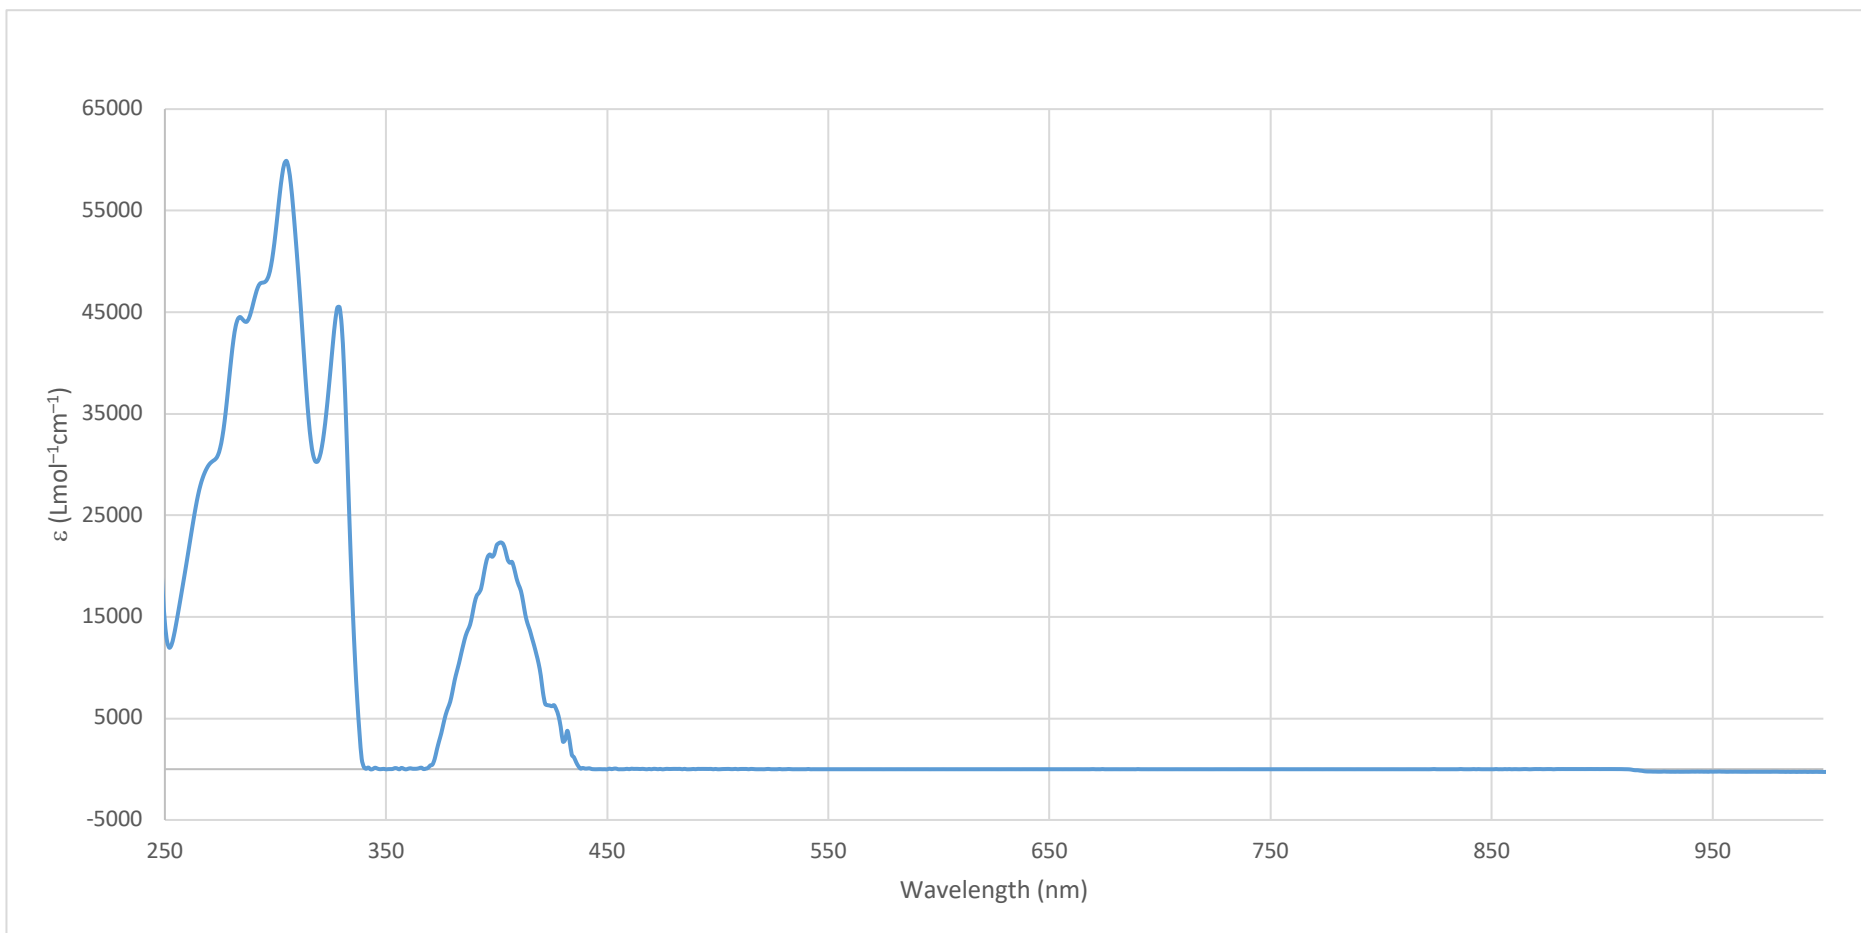

Figure S27. Electronic spectrum (CH<sub>2</sub>Cl<sub>2</sub>) of dimerization product (4).

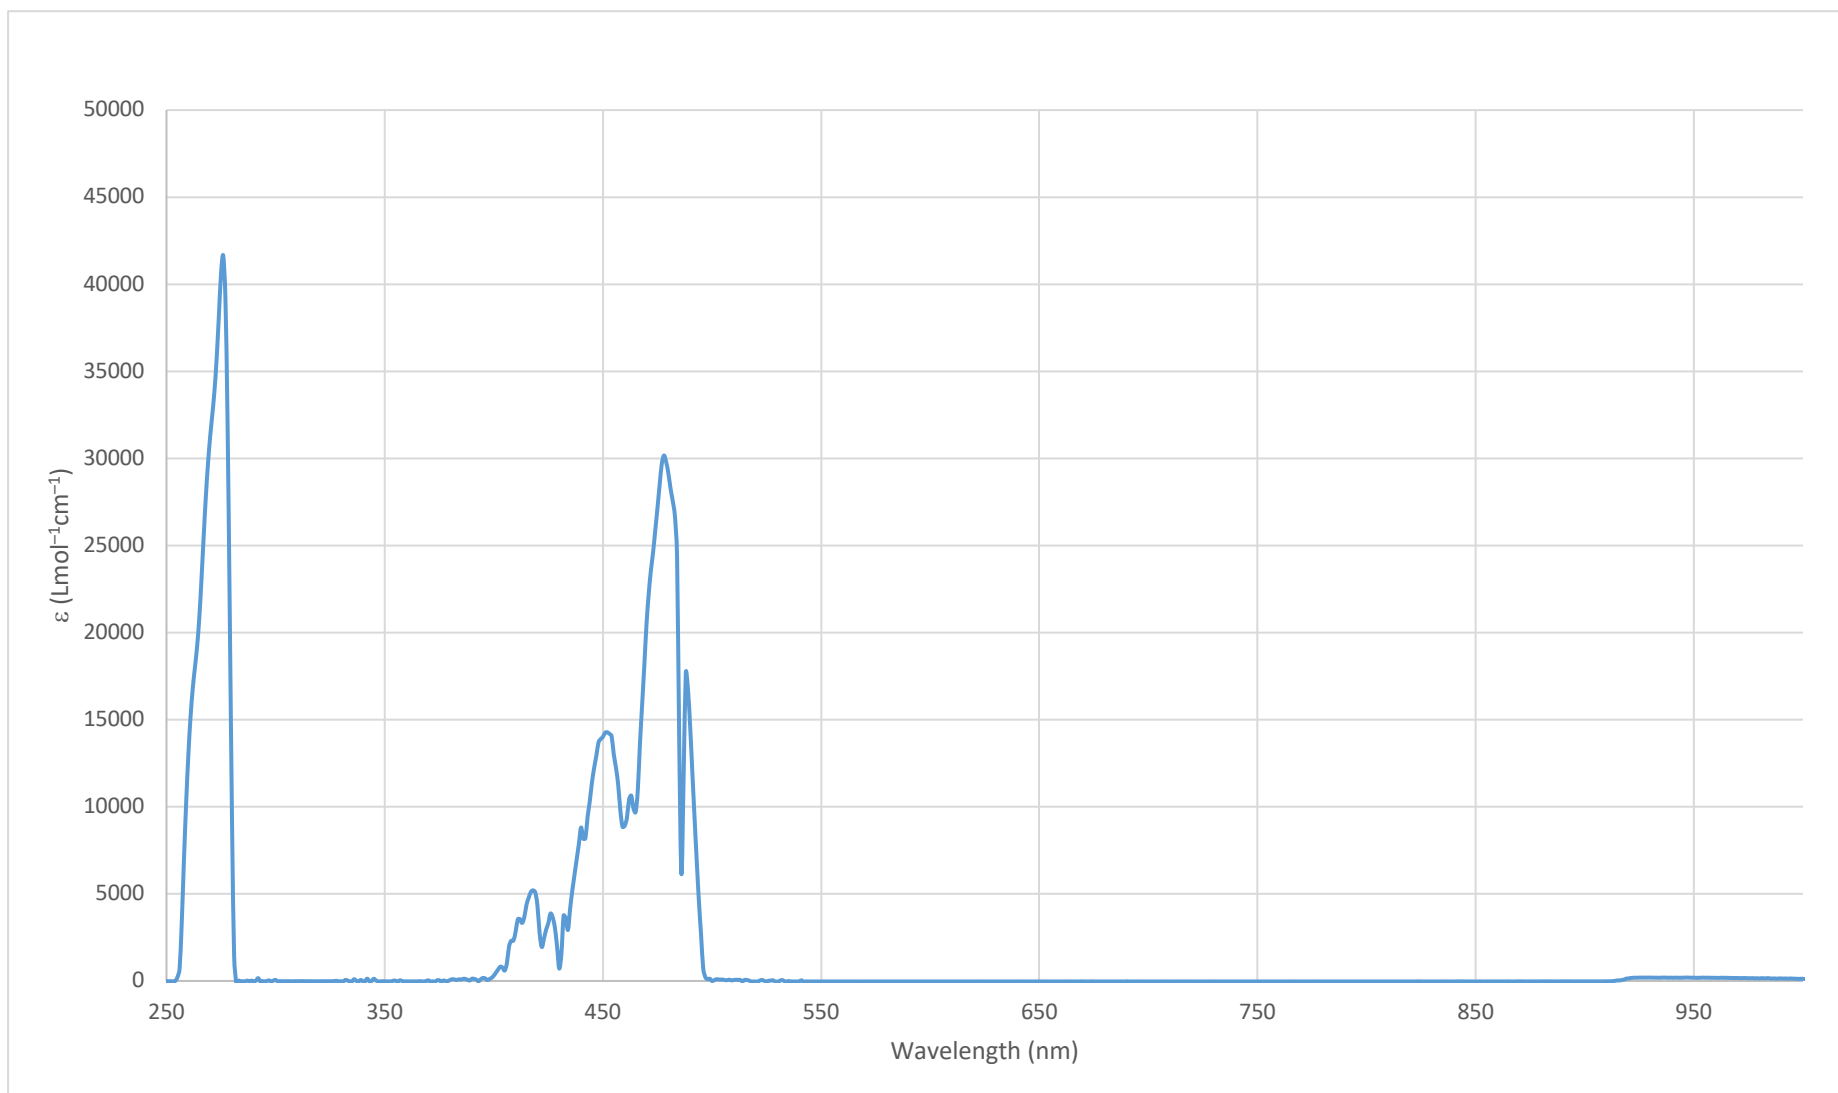

Figure S28. Electronic spectrum (CH<sub>2</sub>Cl<sub>2</sub>) of 9,10-bis(phenylbut-1,3-diyn-1-yl)anthracene (5).

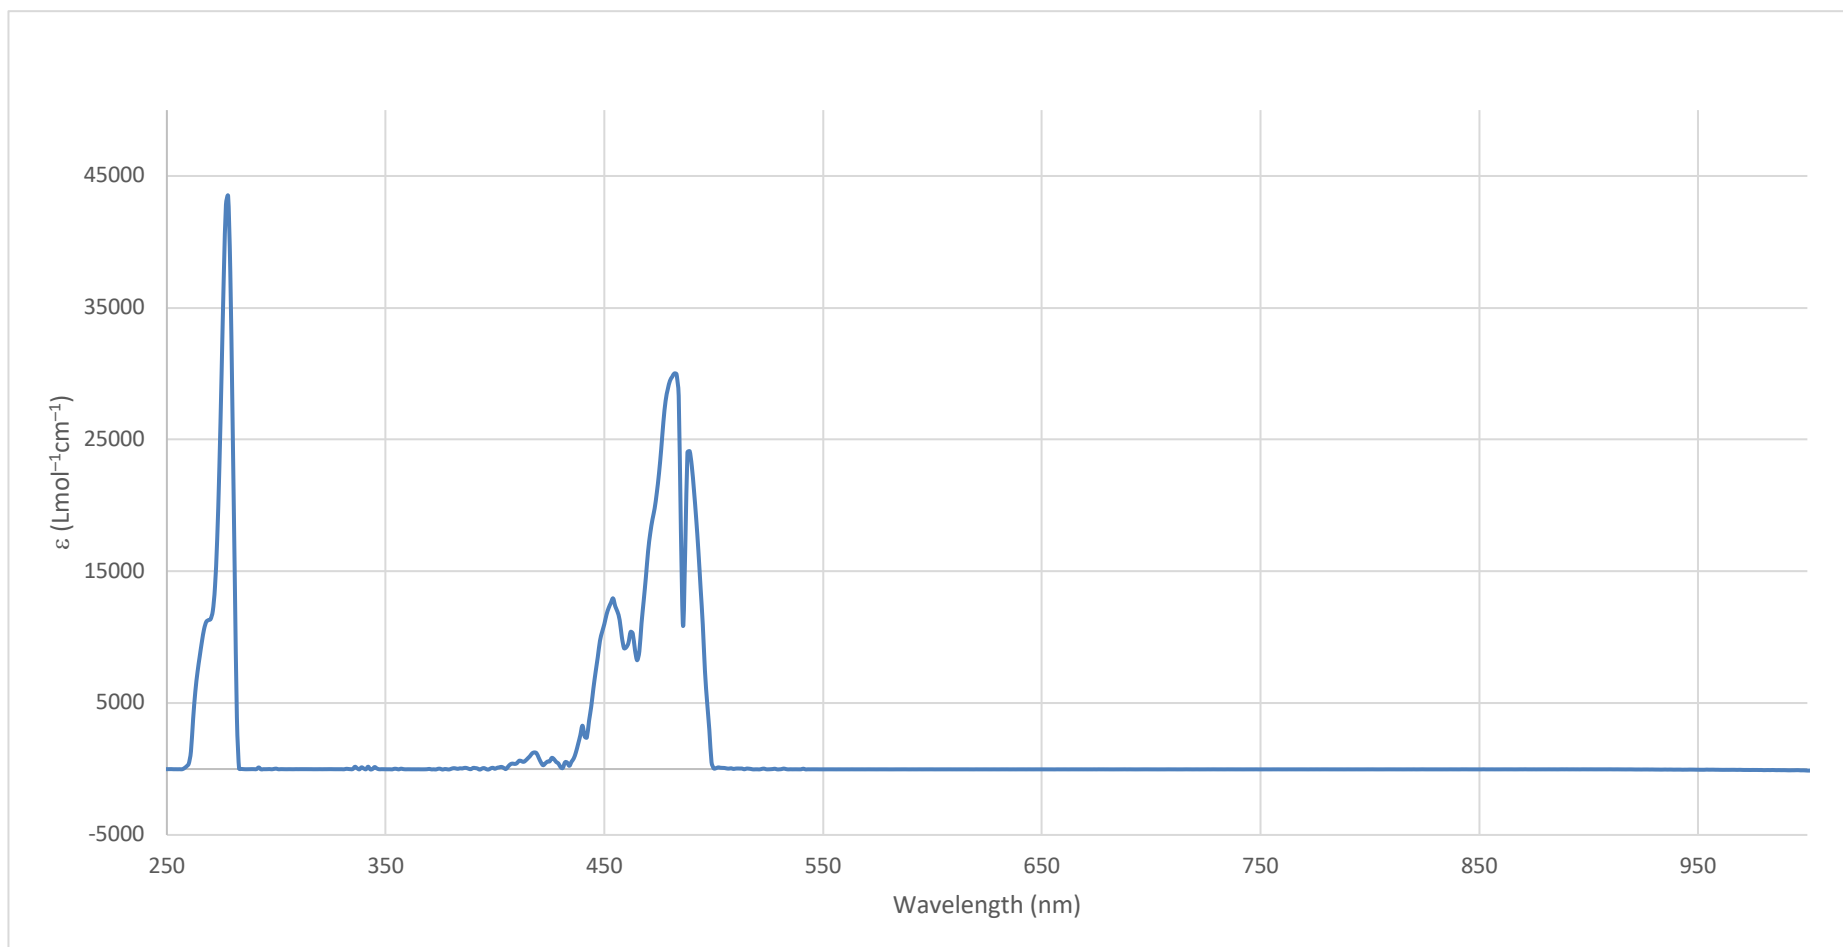

**Figure S29.** Electronic spectrum (CH<sub>2</sub>Cl<sub>2</sub>) of 9,10-bis((4-bromophenyl)but-1,3-diy-1-yl)anthracene (**6**).

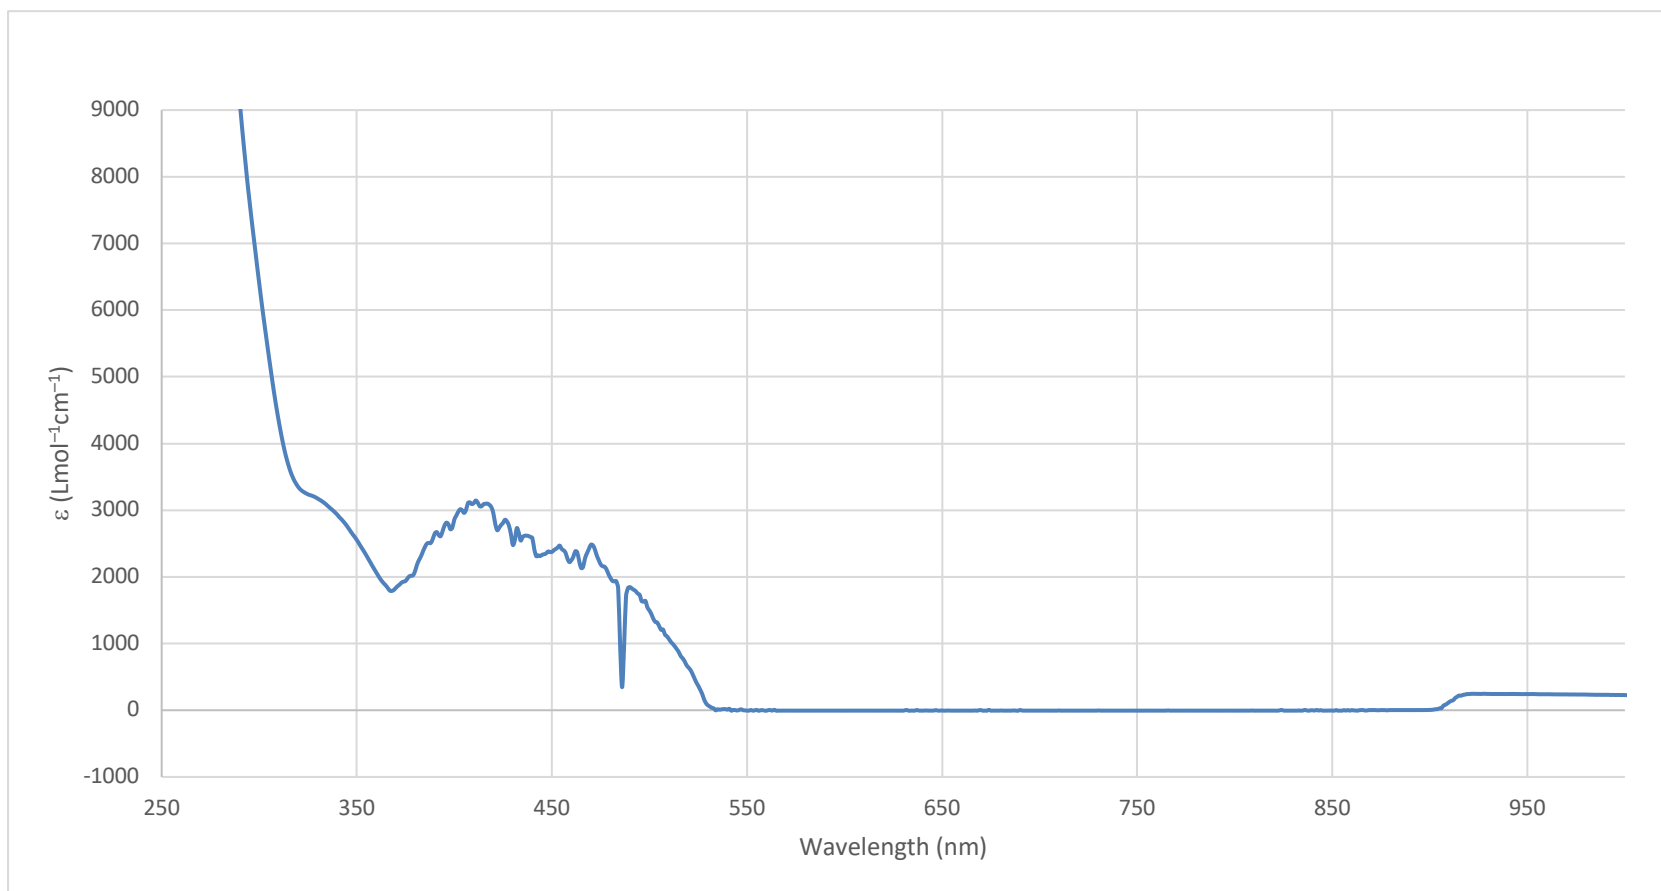

Figure S30. Electronic spectrum ( $\text{CH}_2\text{Cl}_2$ ) of tetracobalt complex (7).

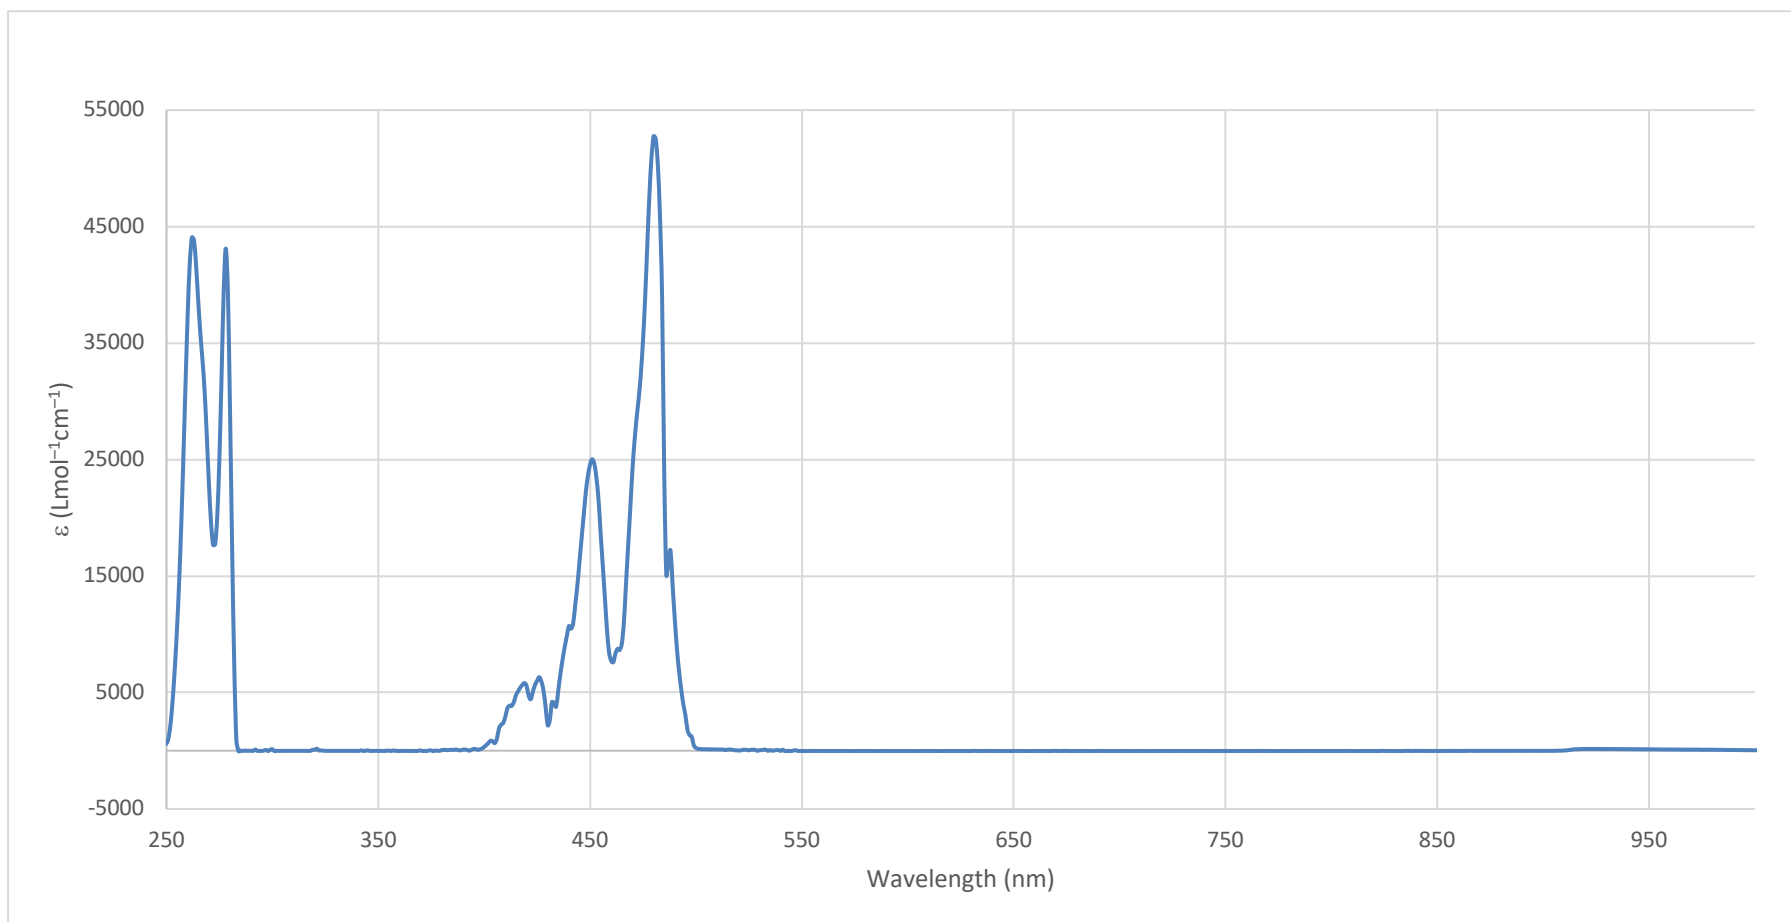

**Figure S31.** Electronic spectrum (CH<sub>2</sub>Cl<sub>2</sub>) of 9,10-bis(triphenylphosphinegold-buta-1,3-diy-1-yl)anthracene (**8**).



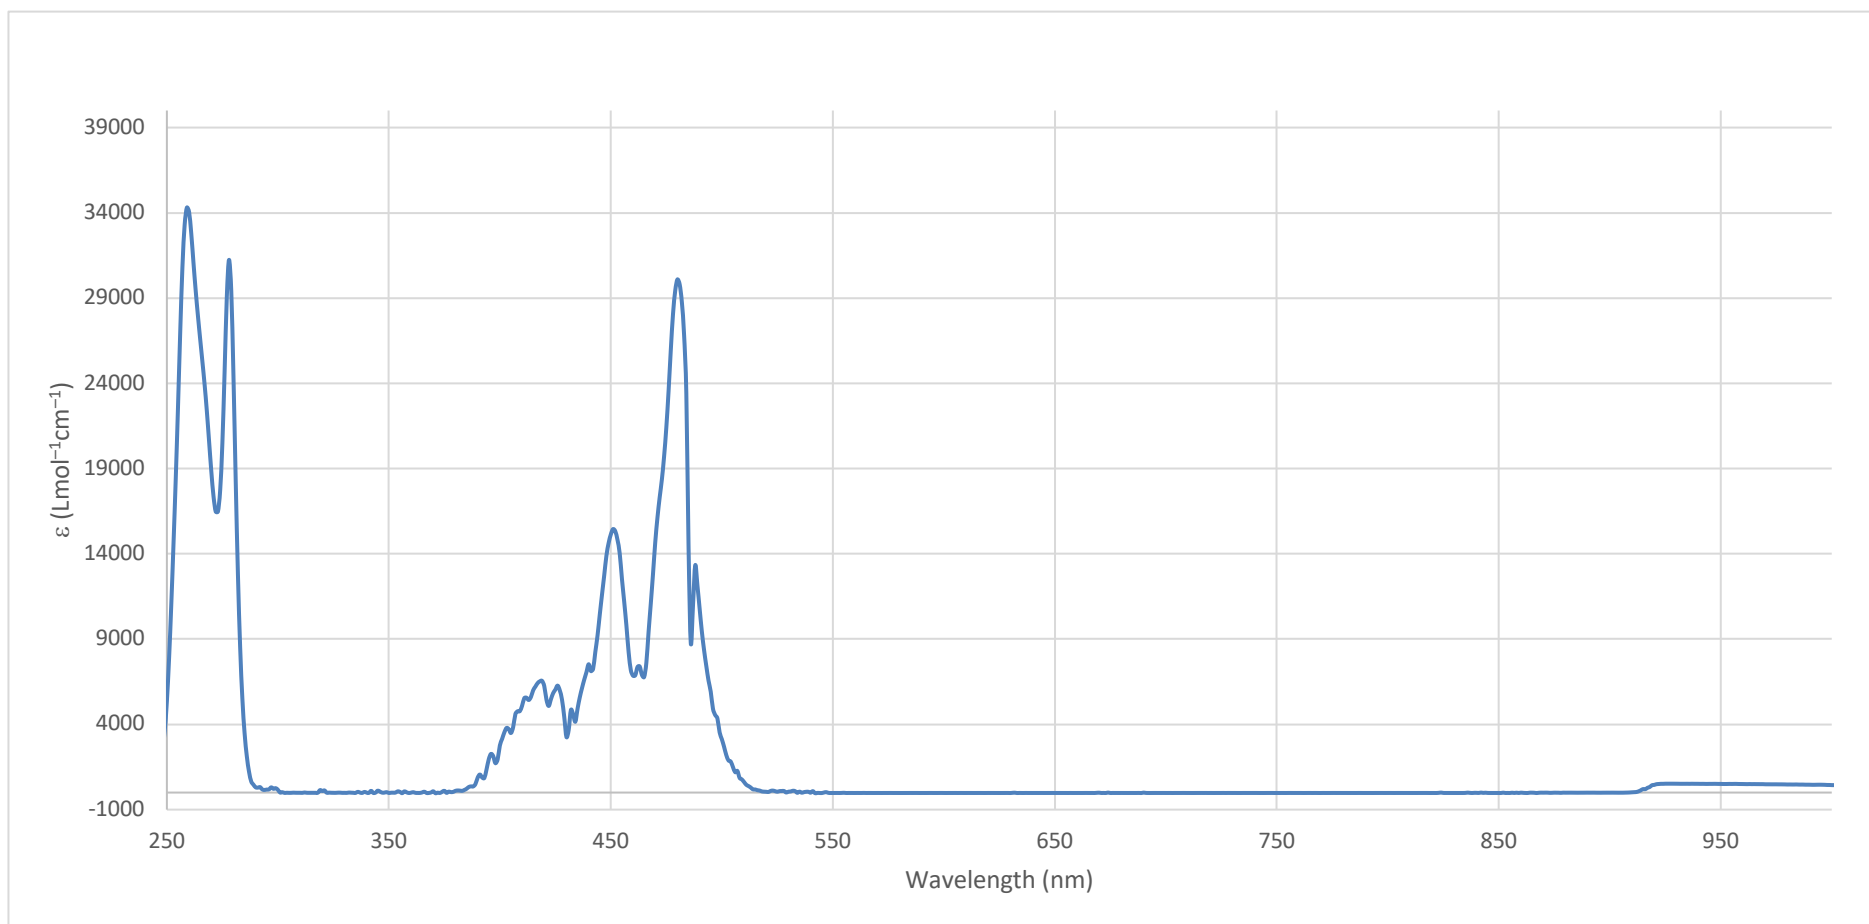

**Figure S32.** Electronic spectrum ( $\text{CH}_2\text{Cl}_2$ ) of 9,10-bis(tricyclohexylphosphine)gold-buta-1,3-diyne-1-yl)anthracene (**9**).

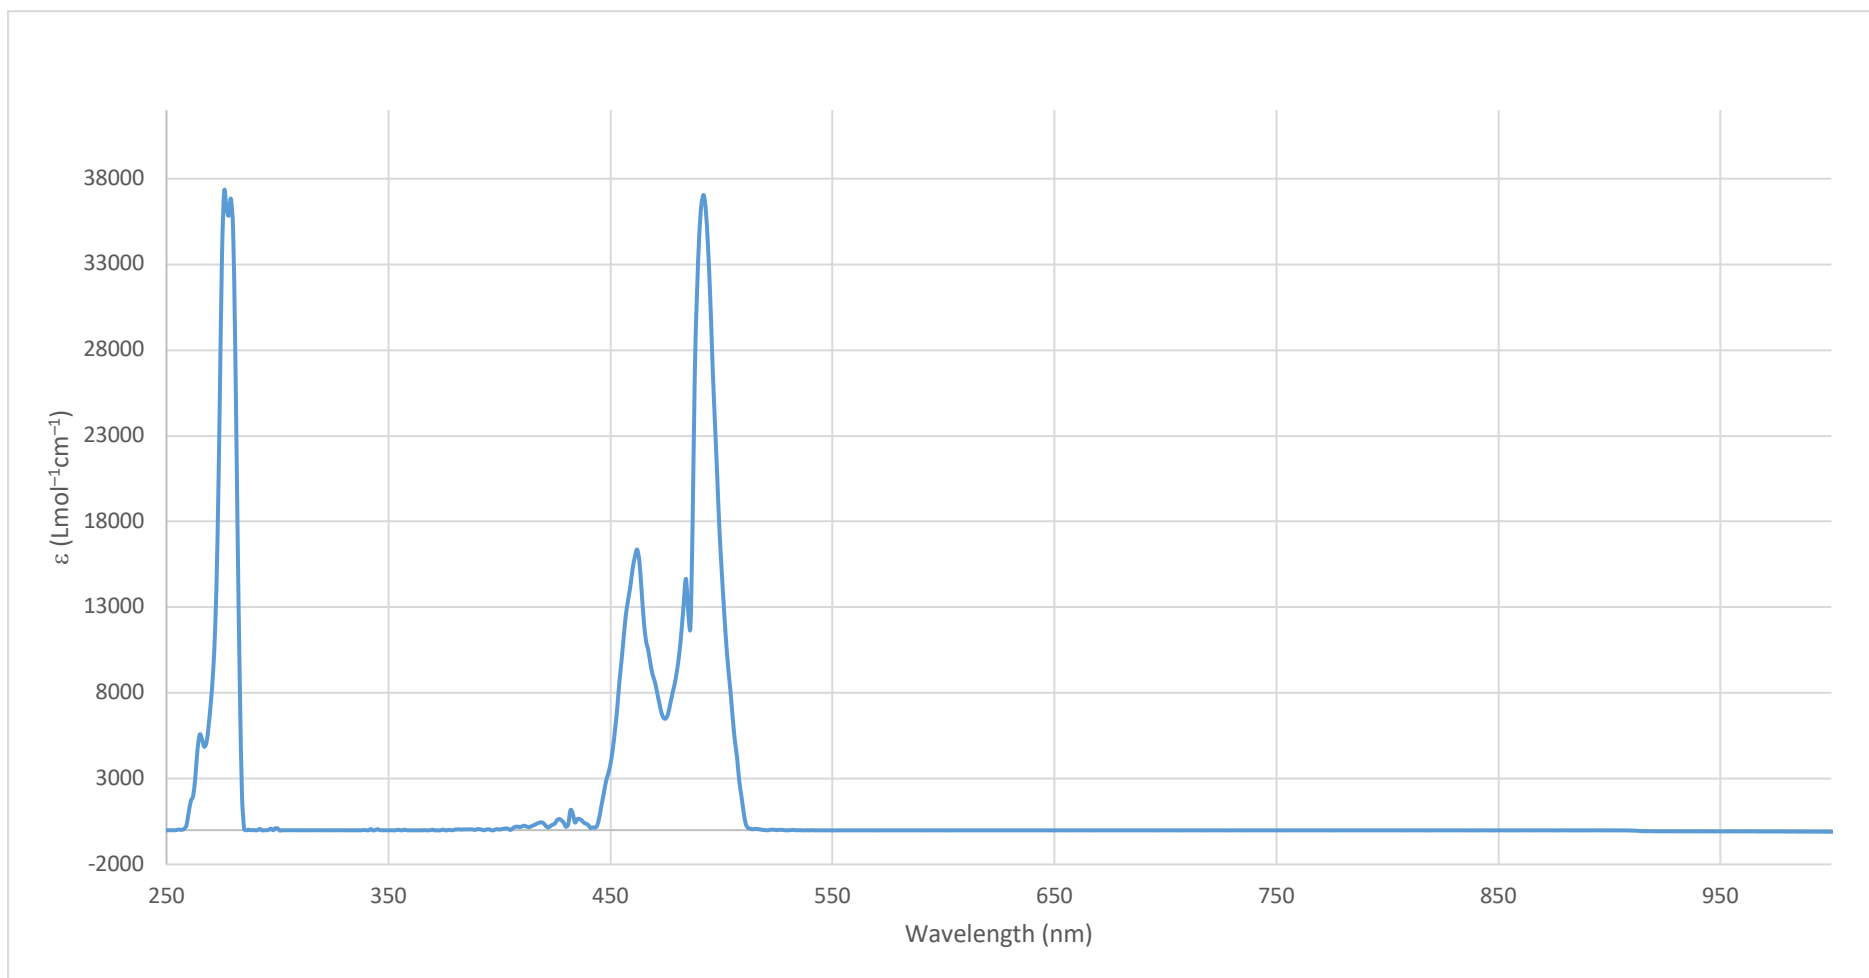

**Figure S33.** Electronic spectrum (CH<sub>2</sub>Cl<sub>2</sub>) of 9,10-bis(trimethylsilyl)hexa-1,3,5-triyn-1-ylanthracene (**10**).

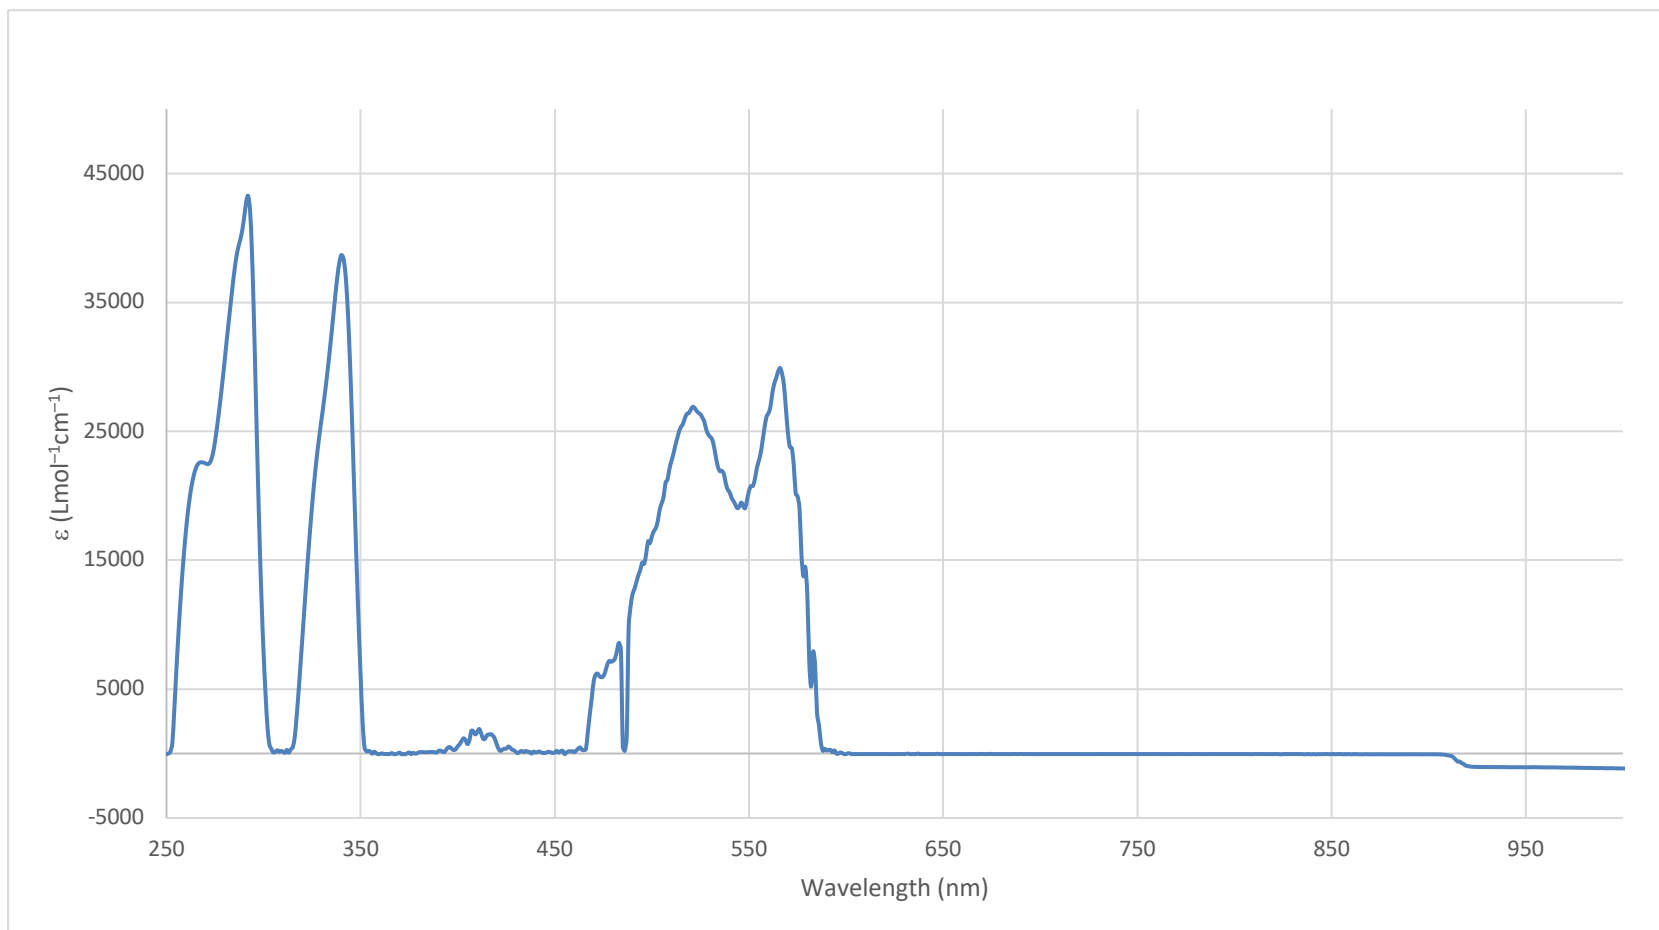

**Figure S34.** Electronic spectrum (CH<sub>2</sub>Cl<sub>2</sub>) of [9,10-((Tp\*)(CO)<sub>2</sub>Mo≡CC≡CC)C<sub>14</sub>H<sub>8</sub>] (**11**).

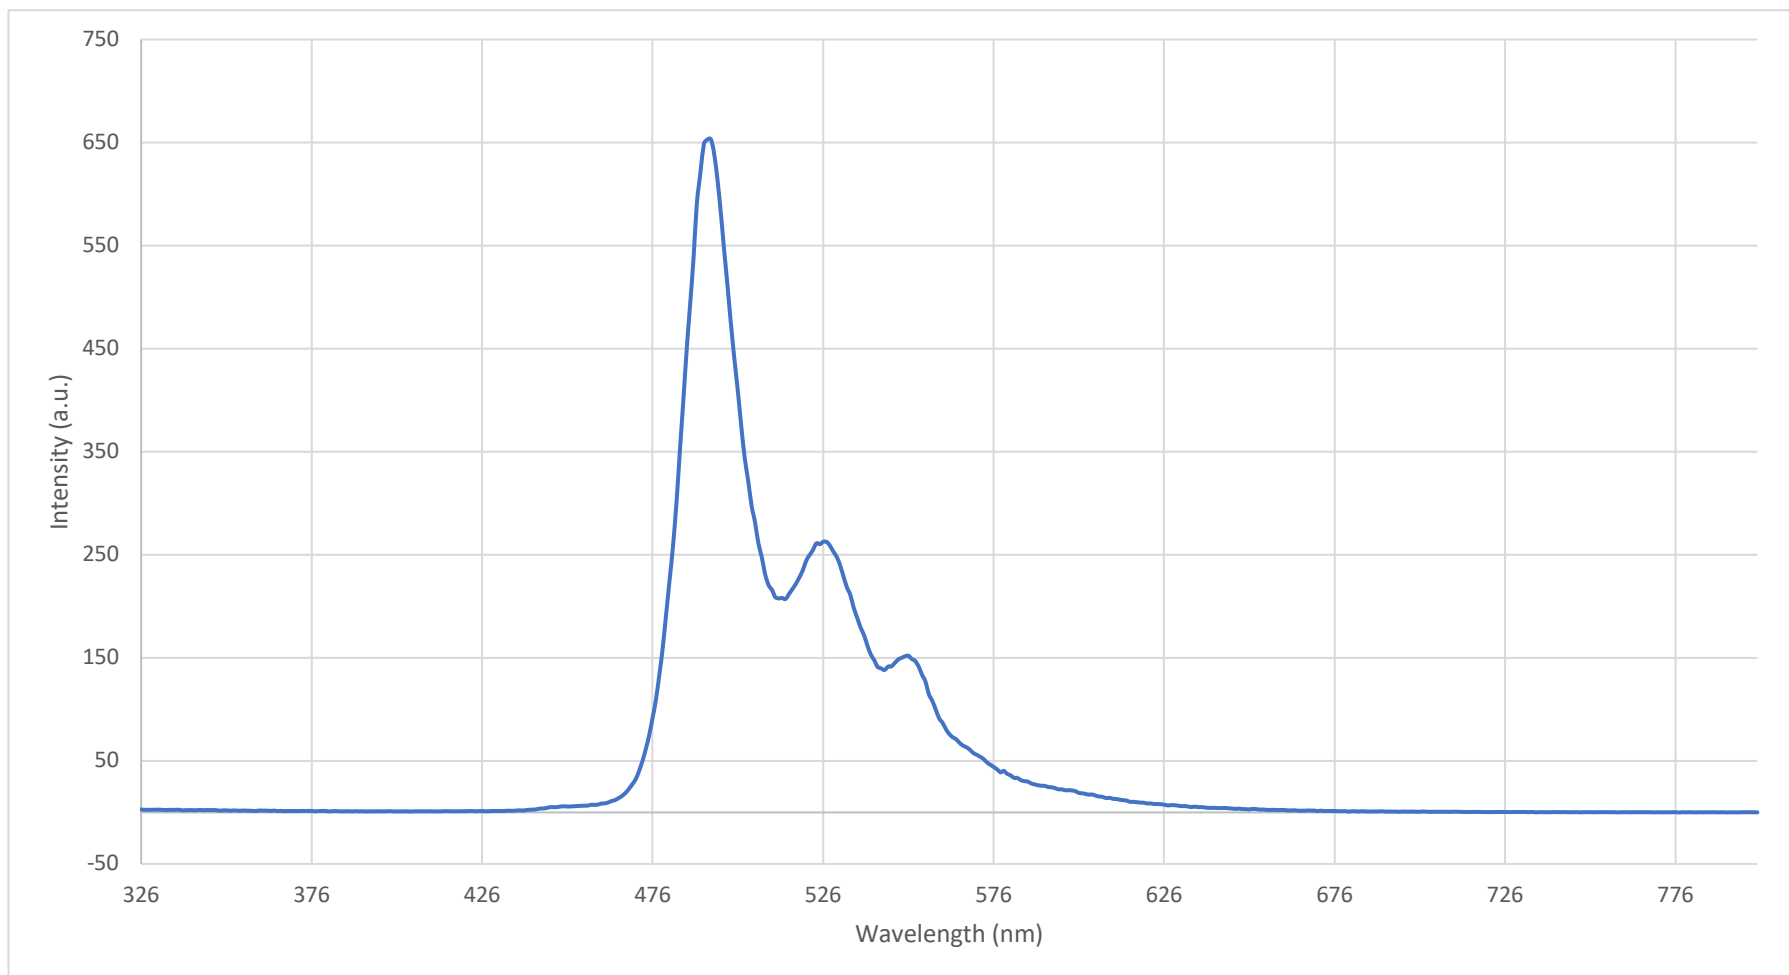

Figure S35. Emission spectrum (CH<sub>2</sub>Cl<sub>2</sub>) of 9,10-bis(phenylbut-1,3-diy-1-yl)anthracene (5) with 276 nm excitation.

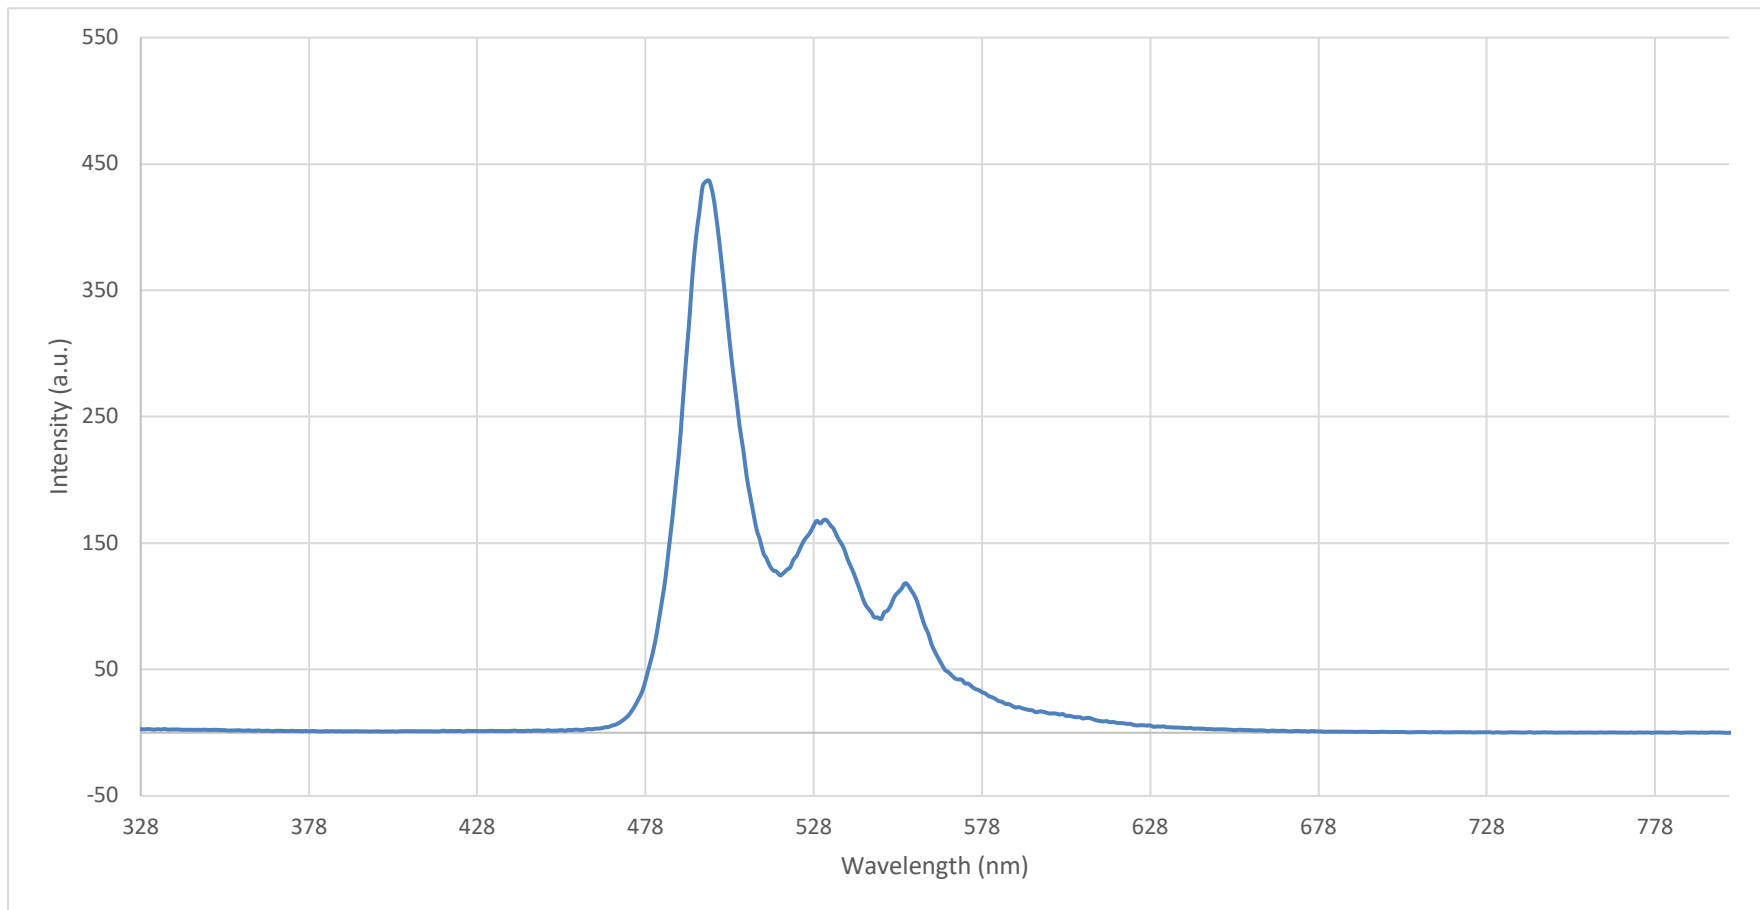

**Figure S36.** Emission spectrum ( $\text{CH}_2\text{Cl}_2$ ) of 9,10-bis((4-bromophenyl)but-1,3-diyn-1-yl)anthracene (**6**) with 278 nm excitation.

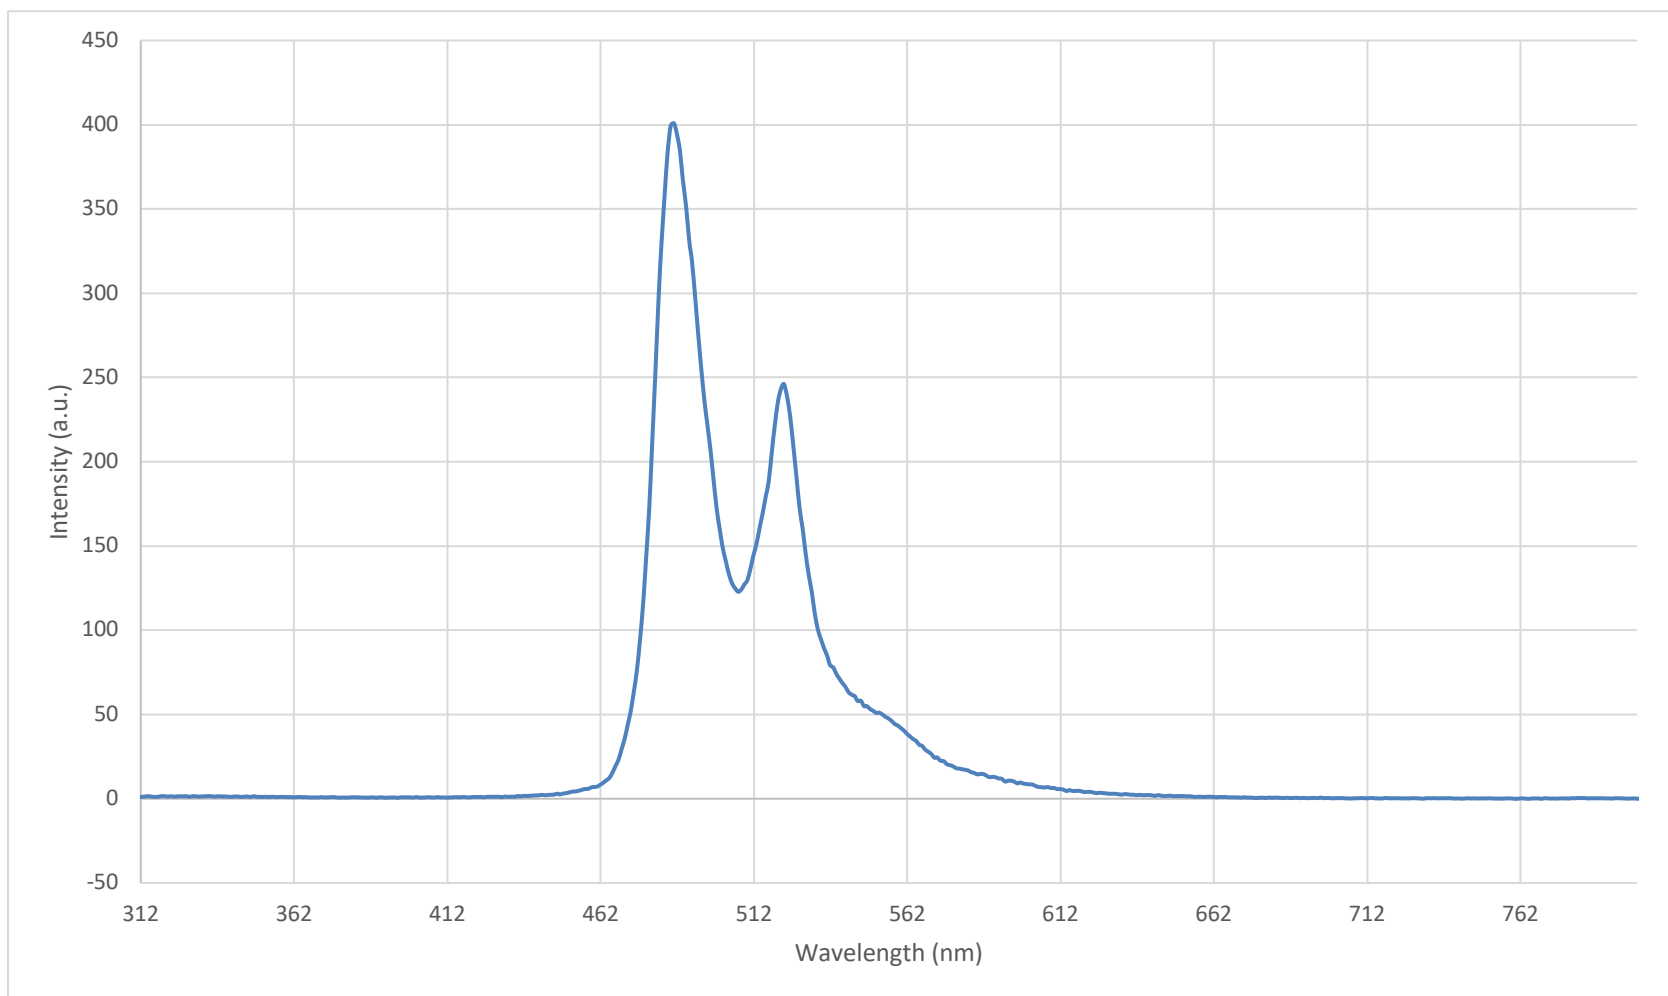

**Figure S37.** Emission spectrum (CH<sub>2</sub>Cl<sub>2</sub>) of 9,10-bis(triphenylphosphinegold-buta-1,3-diyne-1-yl)anthracene (**8**) with 262 nm excitation.

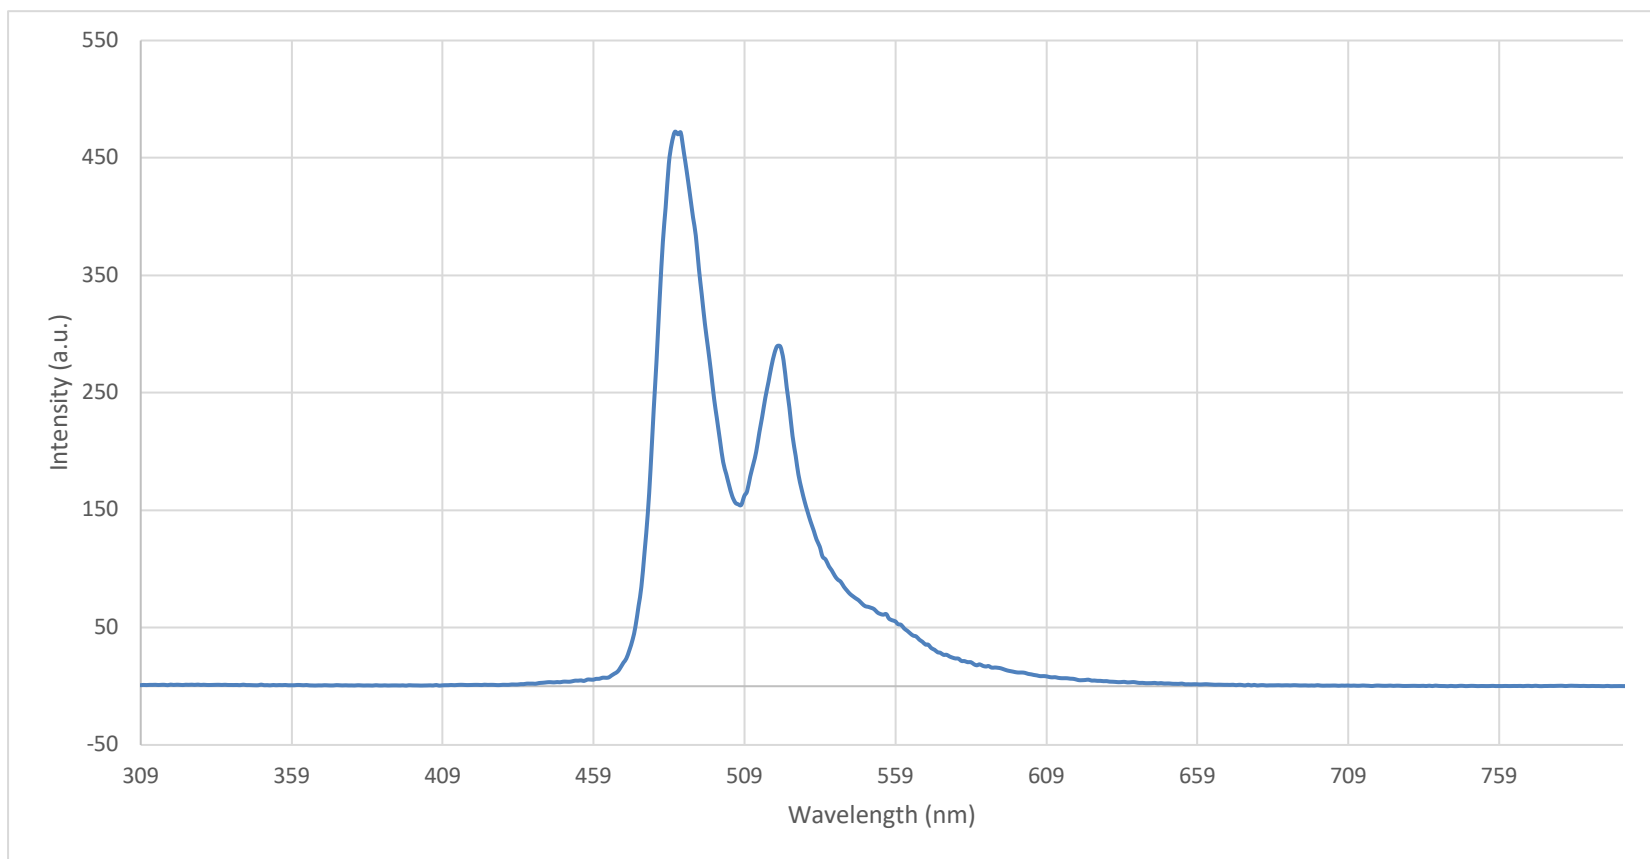

**Figure S38.** Emission spectrum (CH<sub>2</sub>Cl<sub>2</sub>) of 9,10-bis(tricyclohexylphosphinegold-buta-1,3-diyn-1-yl)anthracene (**9**) with 259 nm excitation.

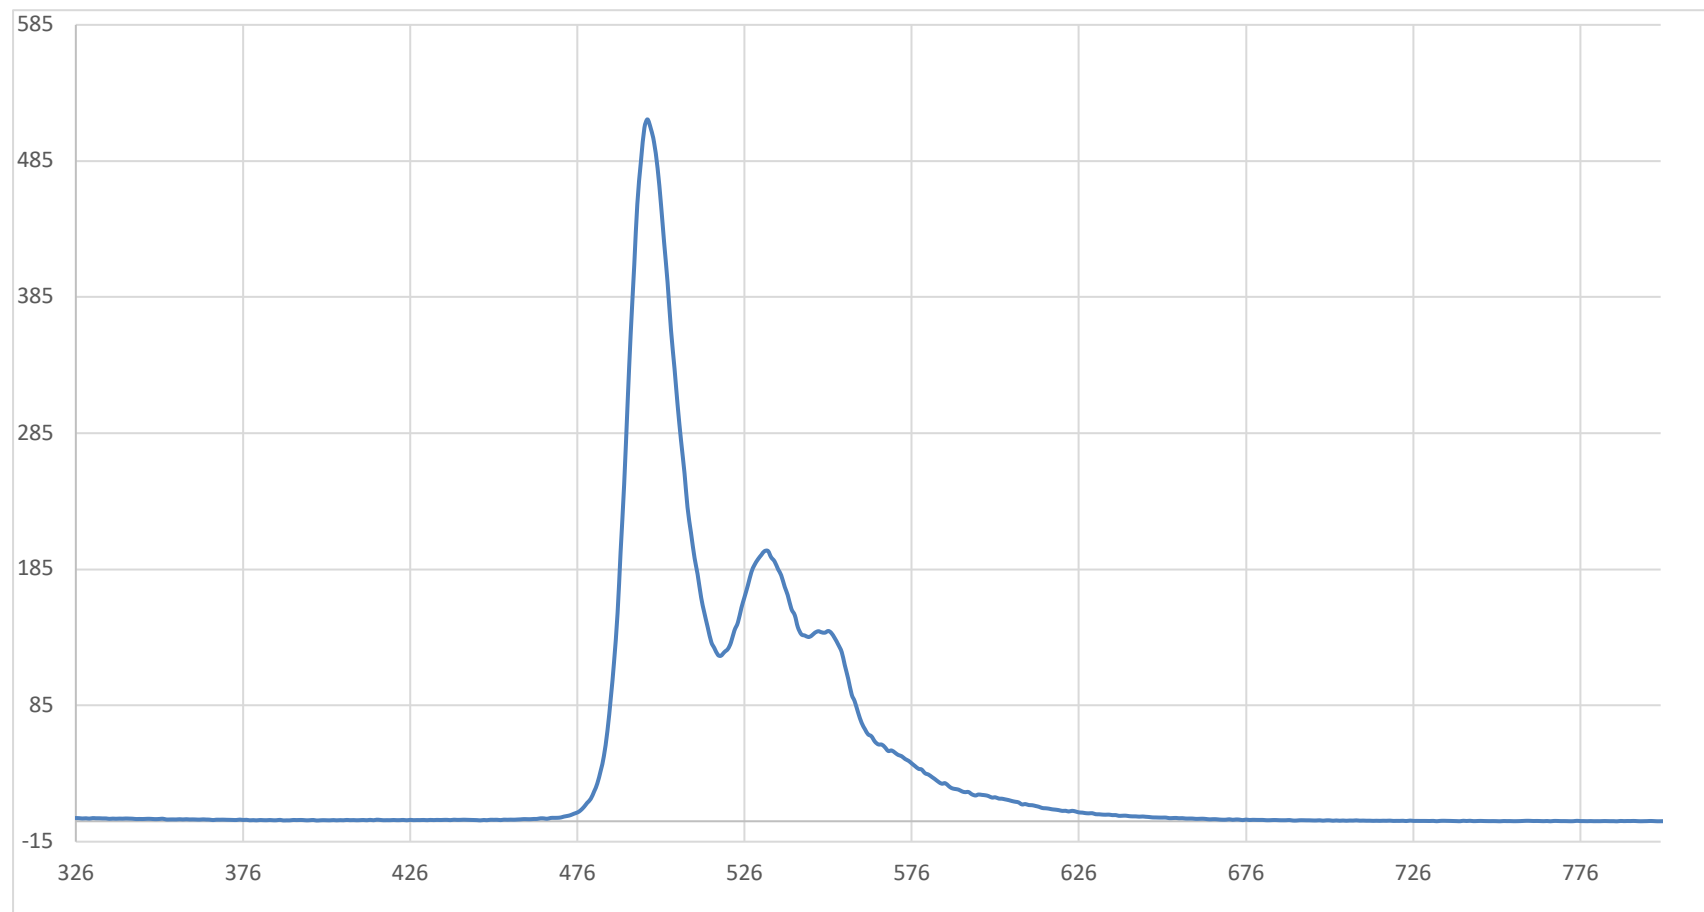

**Figure S39.** Emission spectrum ( $\text{CH}_2\text{Cl}_2$ ) of 9,10-bis(trimethylsilyl)hexa-1,3,5-trien-1-ylanthracene (**10**) with 276 nm excitation.



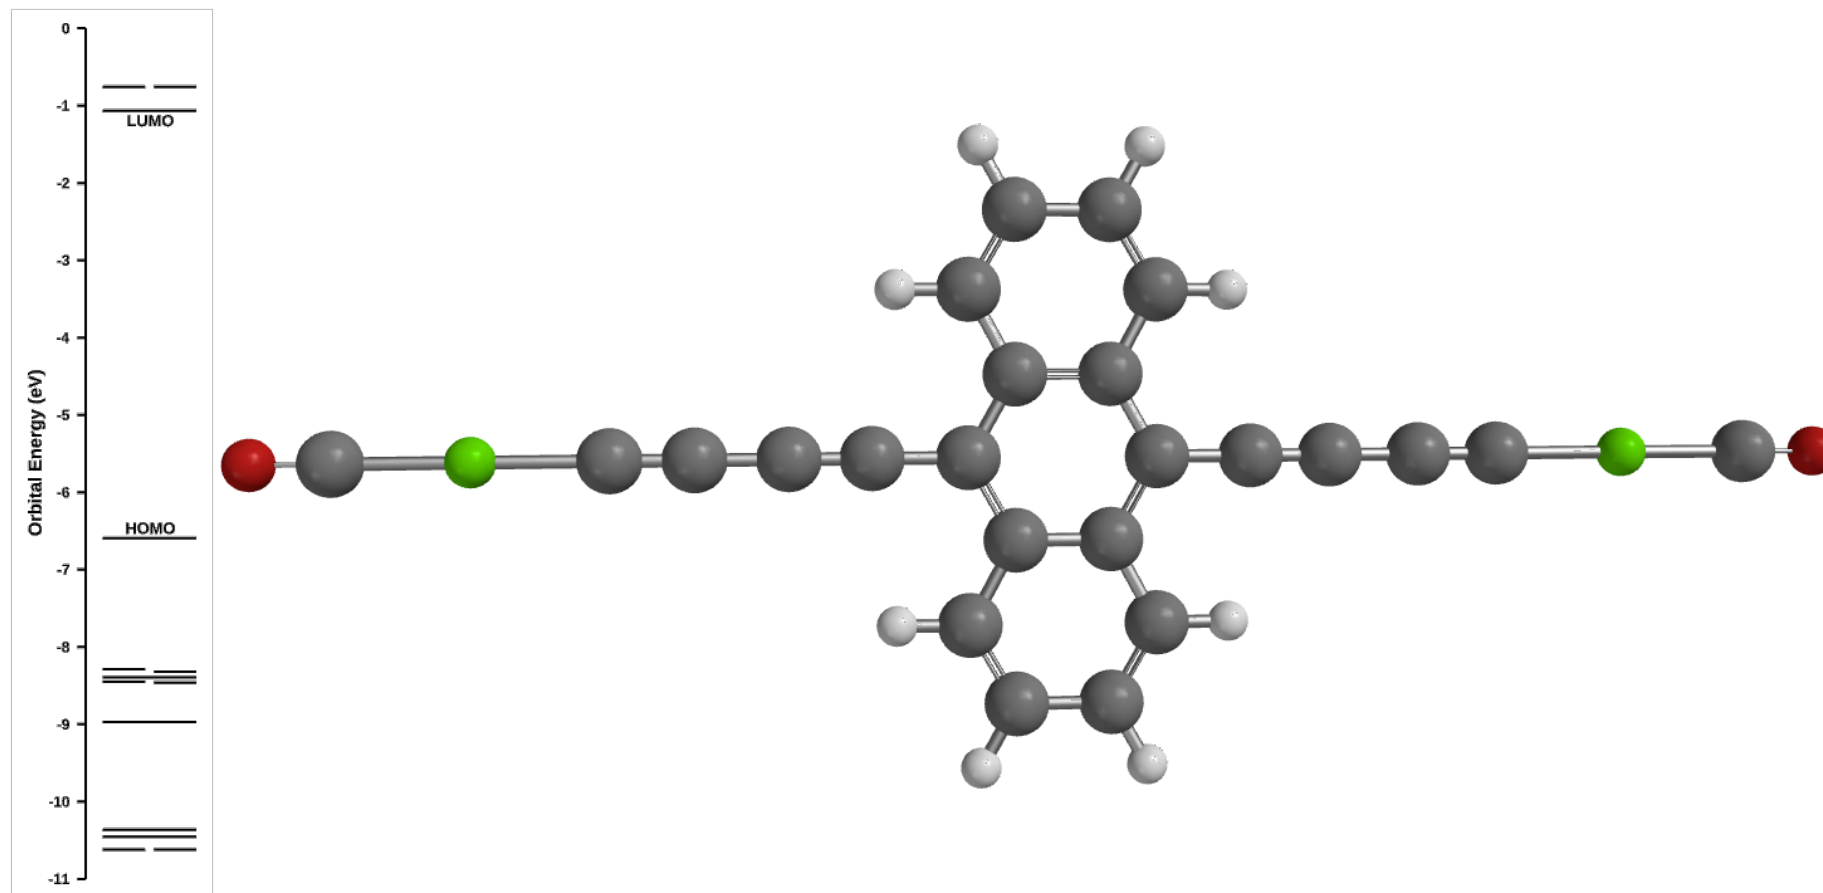

Figure S40. Optimised Geometry and frontier orbitals of (OC)Au-C≡C-C≡C-C<sub>14</sub>H<sub>8</sub>-C≡C-C≡C-Au(CO) ( $\omega$ B97X-D/6-31G\*/LANL2DZ(Au)/Gas phase)

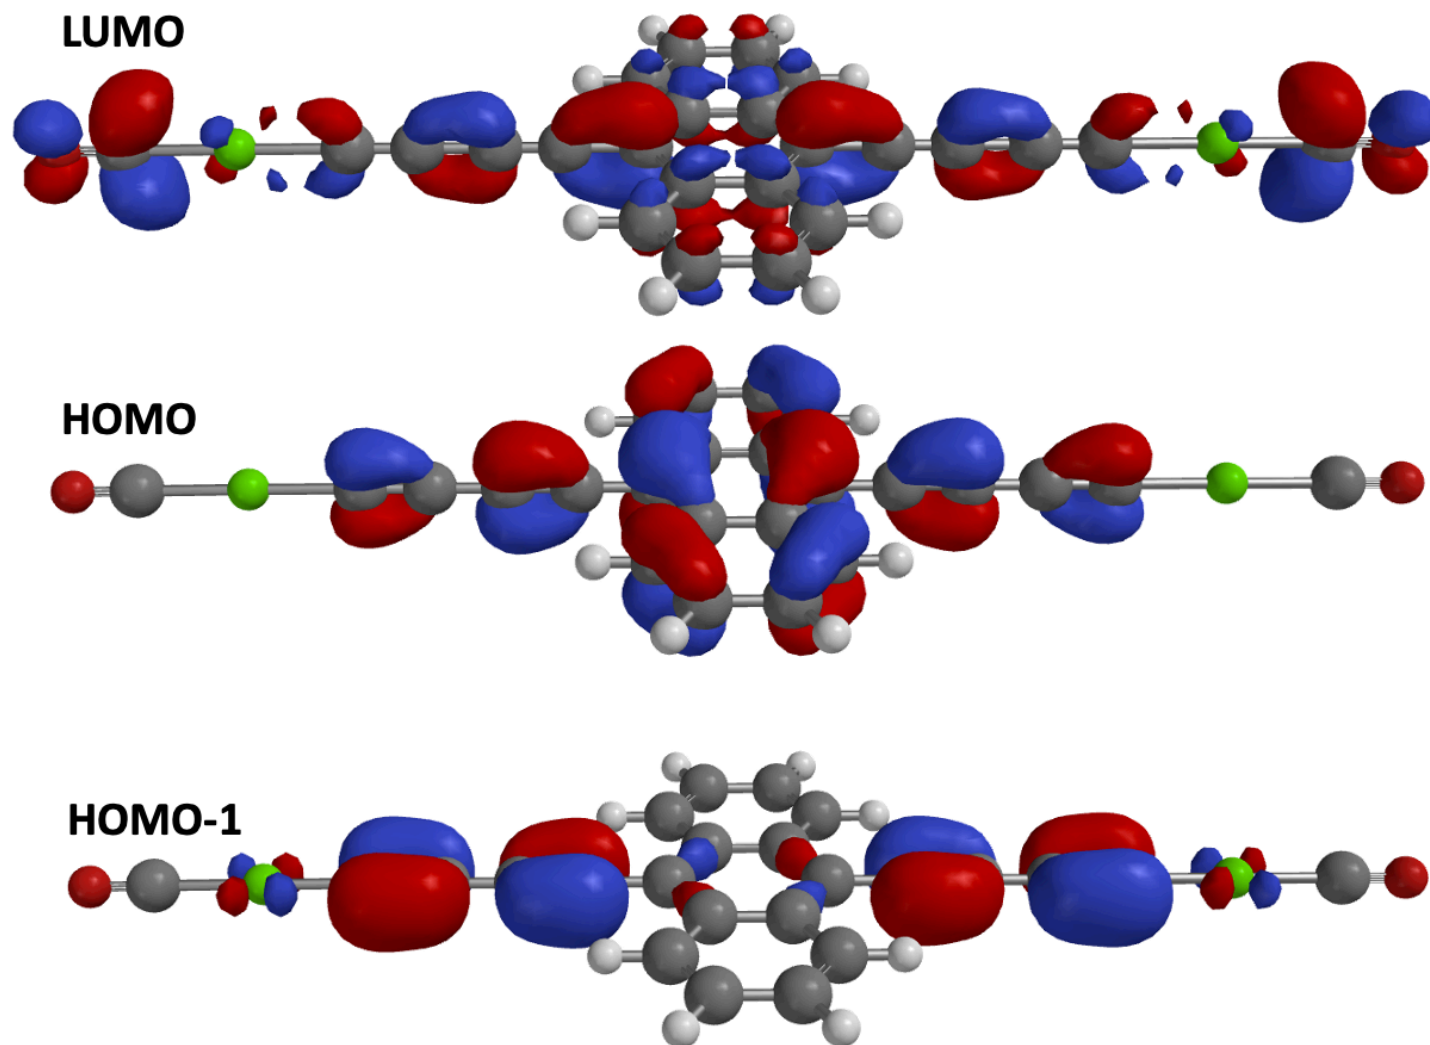

**Figure S41.** Frontier orbitals of interest for  $(OC)Au-C\equiv C-C\equiv C-C_{14}H_8-C\equiv C-C\equiv C-Au(CO)$  ( $\omega B97X-D/6-31G^*/LANL2DZ(Au)/Gas\ phase$ )

| nm ▼   | strength | MO Component                |     |
|--------|----------|-----------------------------|-----|
| 336.51 | 0.0000   | HOMO-2 $\Rightarrow$ LUMO   | 62% |
|        |          | HOMO-1 $\Rightarrow$ LUMO+3 | 20% |
| 338.26 | 0.0000   | HOMO-1 $\Rightarrow$ LUMO   | 63% |
|        |          | HOMO-2 $\Rightarrow$ LUMO+3 | 18% |
| 340.31 | 0.0000   | HOMO $\Rightarrow$ LUMO+3   | 45% |
|        |          | HOMO-3 $\Rightarrow$ LUMO   | 20% |
| 360.22 | 0.0000   | HOMO $\Rightarrow$ LUMO+2   | 43% |
|        |          | HOMO $\Rightarrow$ LUMO+1   | 14% |
|        |          | HOMO-3 $\Rightarrow$ LUMO+1 | 13% |
| 360.75 | 0.0000   | HOMO $\Rightarrow$ LUMO+1   | 44% |
|        |          | HOMO $\Rightarrow$ LUMO+2   | 14% |
|        |          | HOMO-3 $\Rightarrow$ LUMO+2 | 12% |
| 445.84 | 1.1876   | HOMO $\Rightarrow$ LUMO     | 73% |
|        |          | HOMO $\Rightarrow$ LUMO+4   | 21% |

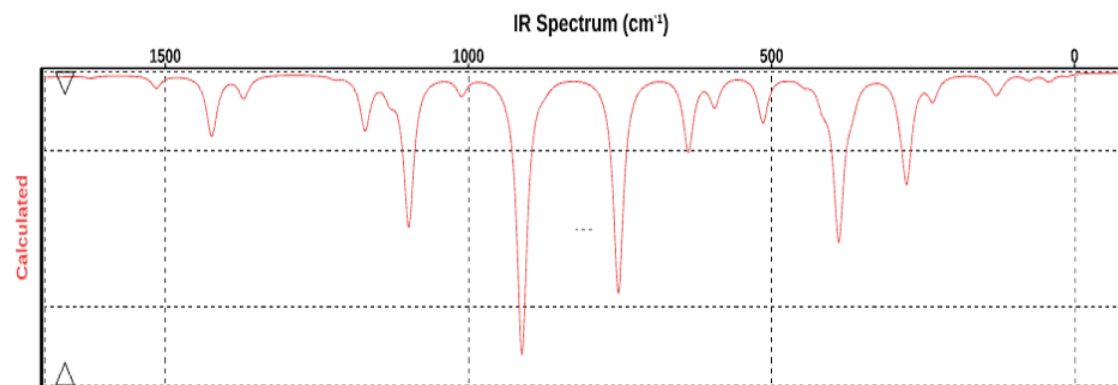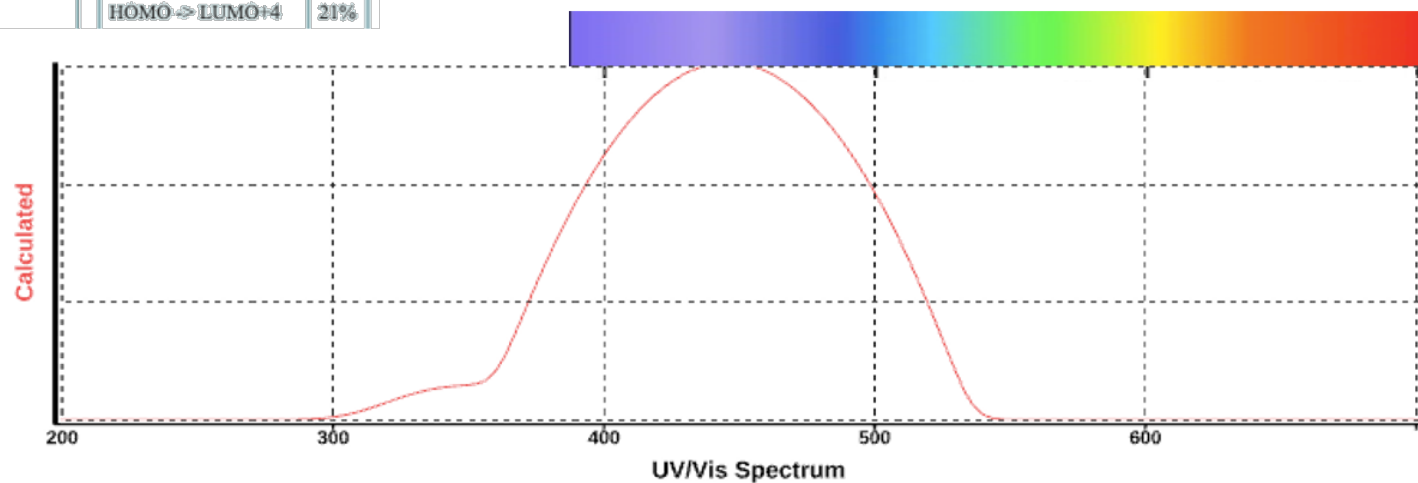

Figure S42. Calculated electronic and infrared spectra of (OC)Au-C≡C-C≡C-C<sub>14</sub>H<sub>8</sub>-C≡C-C≡C-Au(CO) ( $\omega$ B97X-D/6-31G\*/LANL2DZ(Au)/Gas phase)

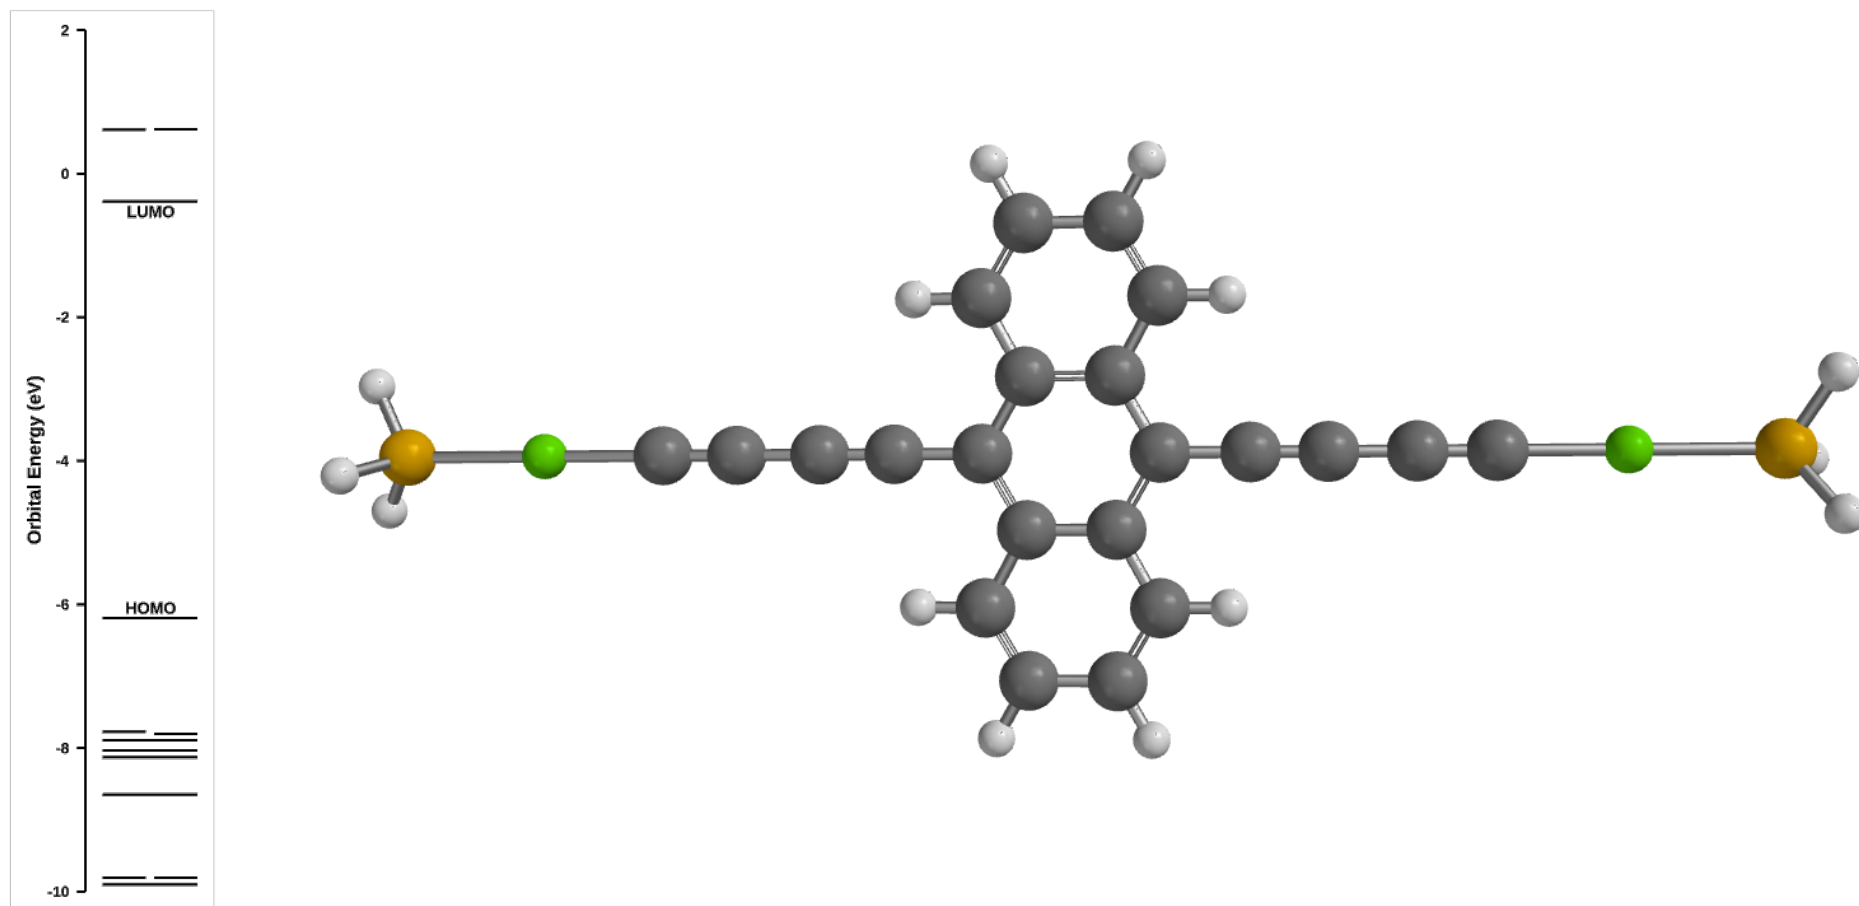

Figure S43. Optimised Geometry and frontier orbitals of  $(\text{H}_3\text{P})\text{Au}-\text{C}\equiv\text{C}-\text{C}\equiv\text{C}-\text{C}_{14}\text{H}_8-\text{C}\equiv\text{C}-\text{C}\equiv\text{C}-\text{Au}(\text{PH}_3)$  ( $\omega\text{B97X-D}/6-31\text{G}^*/\text{LANL2DZ}(\text{Au})/\text{Gas phase}$ )

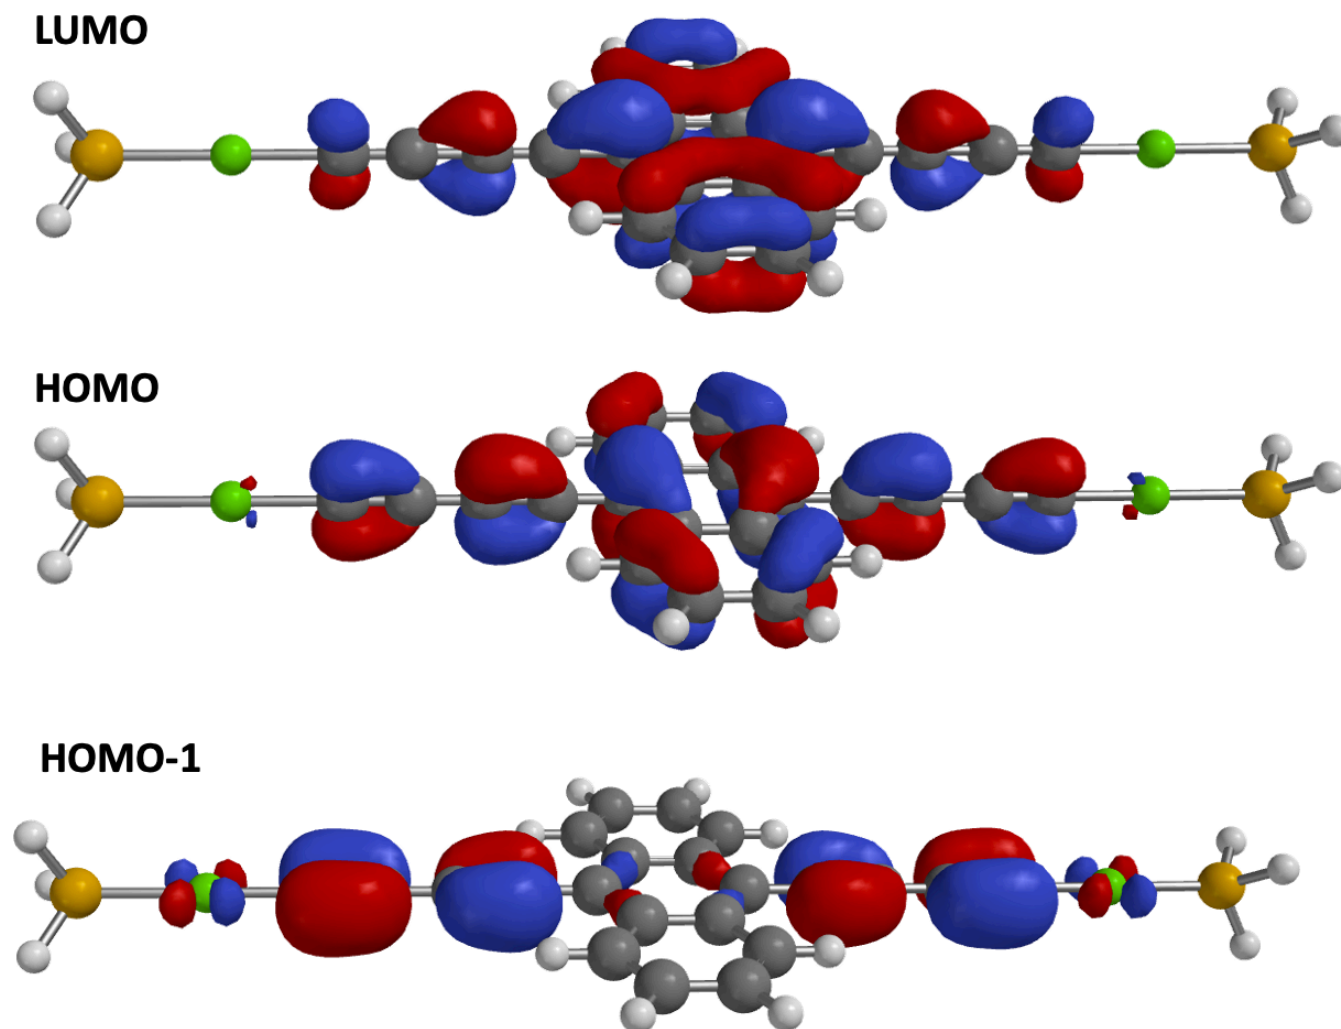

**Figure S44.** Frontier orbitals of interest for  $(\text{H}_3\text{P})\text{Au}-\text{C}\equiv\text{C}-\text{C}\equiv\text{C}-\text{C}_{14}\text{H}_8-\text{C}\equiv\text{C}-\text{C}\equiv\text{C}-\text{Au}(\text{PH}_3)$  ( $\omega\text{B97X-D}/6-31\text{G}^*/\text{LANL2DZ}(\text{Au})/\text{Gas phase}$ )

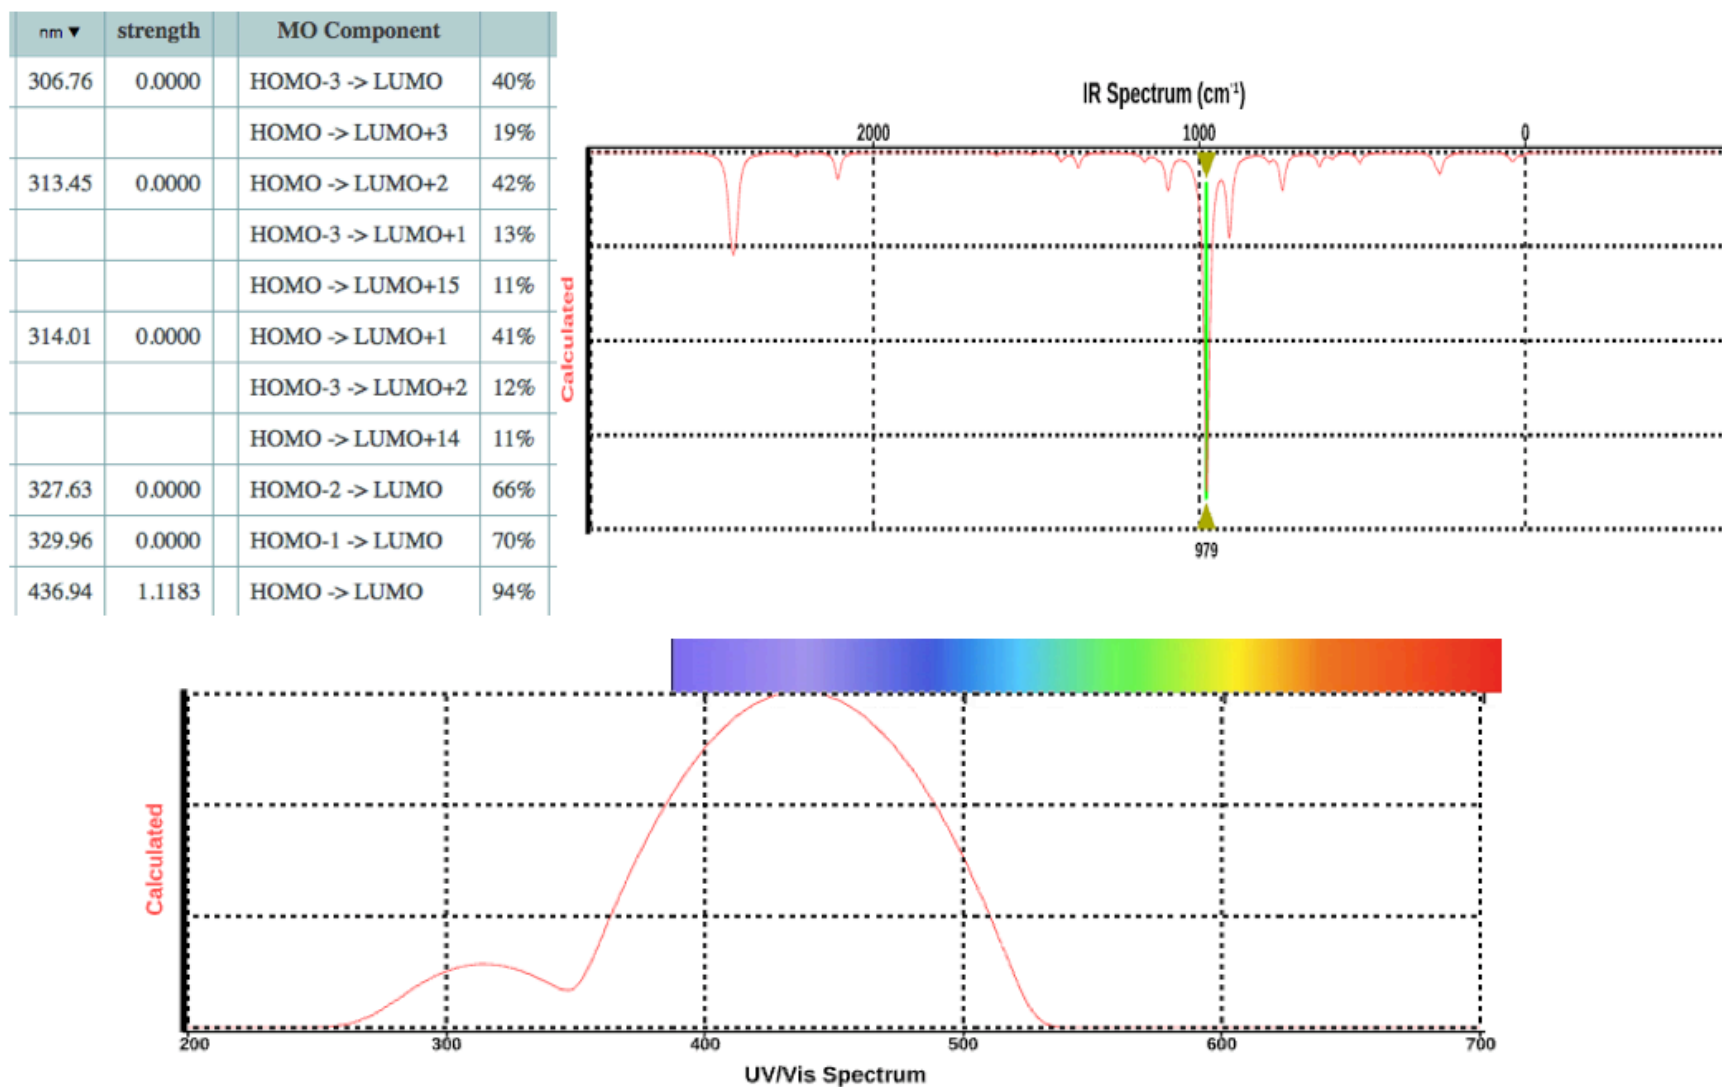

Figure S45. Calculated electronic and infrared spectra of  $(\text{H}_3\text{P})\text{Au}-\text{C}\equiv\text{C}-\text{C}=\text{C}-\text{C}_4\text{H}_8-\text{C}\equiv\text{C}-\text{C}-\text{Au}(\text{PH}_3)$  ( $\omega\text{B97X-D/6-31G}^*/\text{LANL2DZ}(\text{Au})/\text{Gas phase}$ ). NB: The IR absorption at  $979 \text{ cm}^{-1}$  that dominates the spectrum corresponds to a  $\delta_{\text{PH}}$  mode.

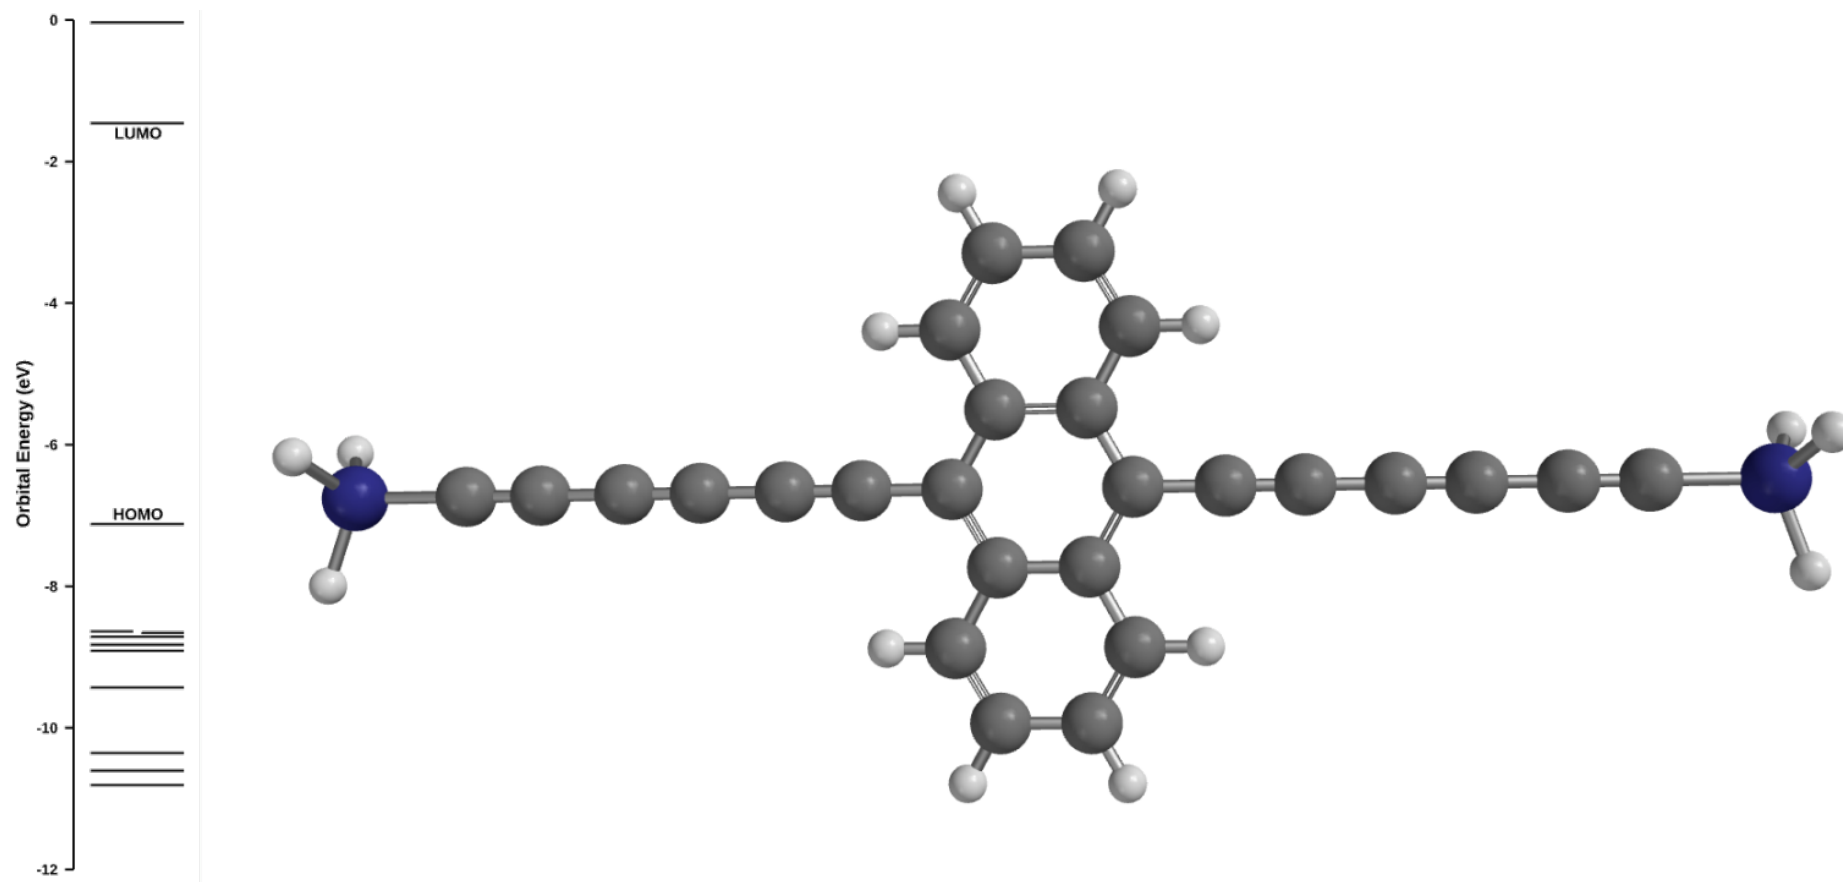

**Figure S46.** Optimised Geometry and frontier orbitals of  $\text{H}_3\text{Si-C}\equiv\text{C}-\text{C}\equiv\text{C}-\text{C}\equiv\text{C}-\text{C}_{14}\text{H}_8-\text{C}\equiv\text{C}-\text{C}\equiv\text{C}-\text{C}\equiv\text{C}-\text{SiH}_3$  ( $\omega\text{B97X-D/6-31G}^*/\text{Gas phase}$ )

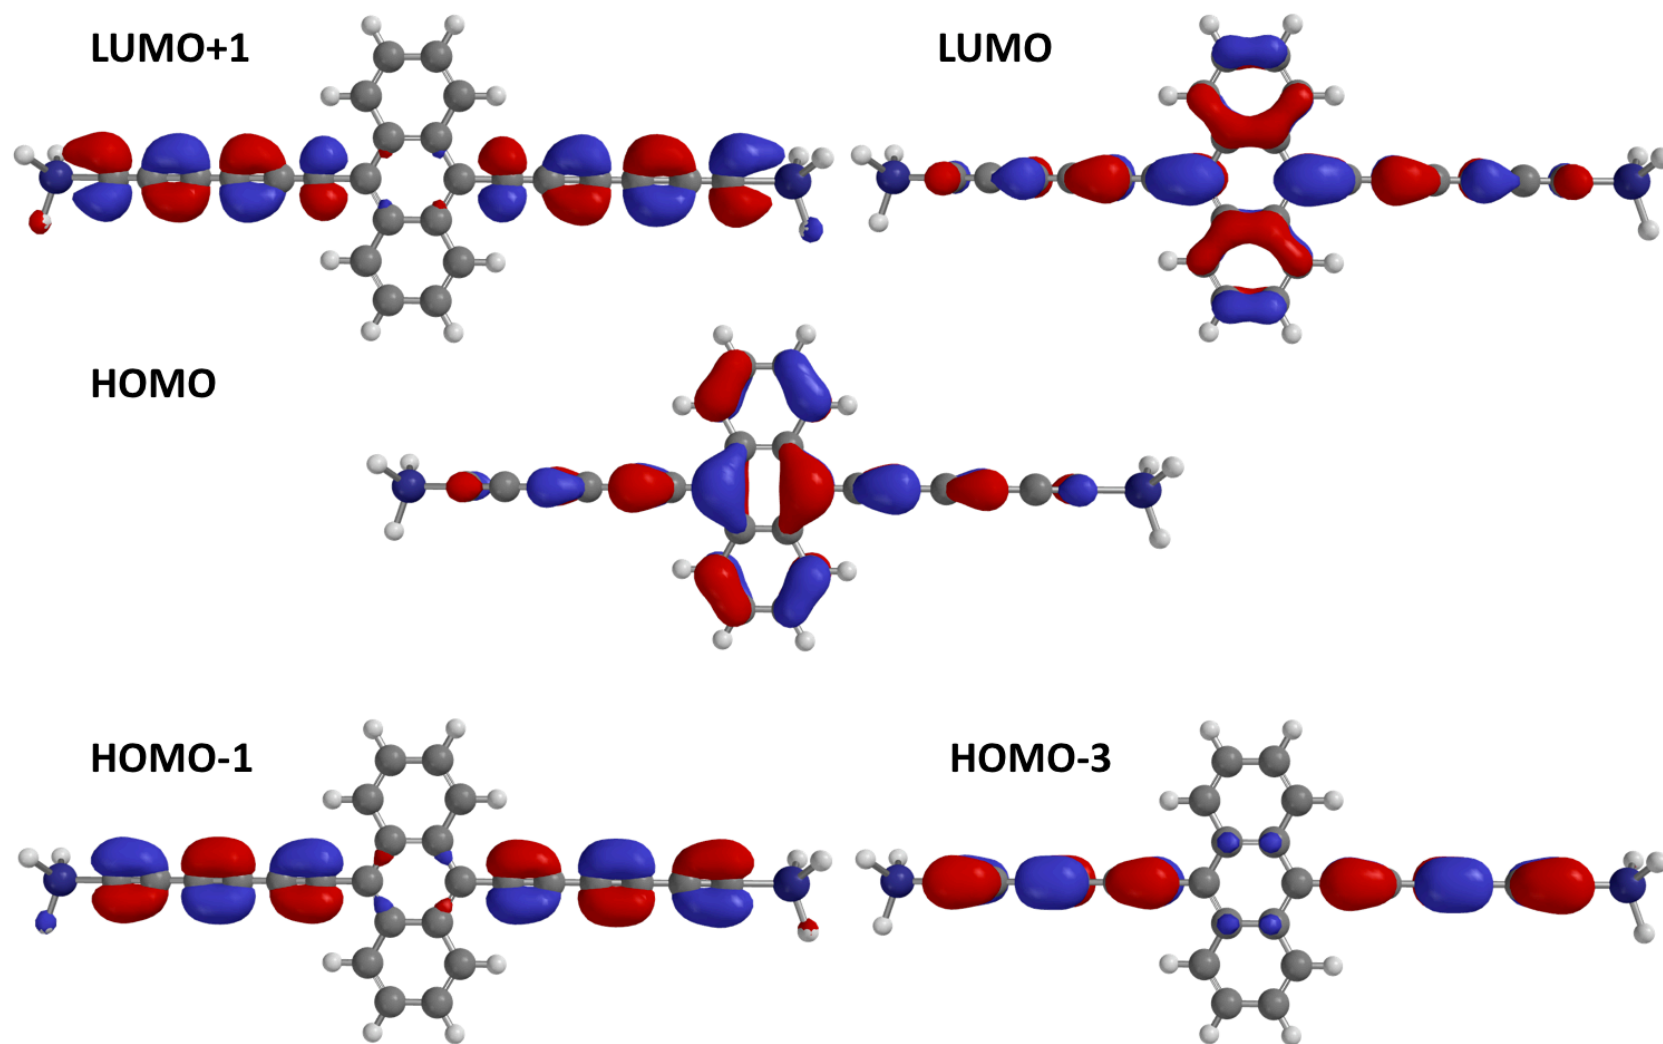

Figure S47. Frontier orbitals of interest for  $\text{H}_3\text{Si-C}\equiv\text{C-C}\equiv\text{C-C}\equiv\text{C-C}_6\text{H}_5\text{-C}\equiv\text{C-C}\equiv\text{C-C}\equiv\text{C-SiH}_3$  ( $\omega\text{B97X-D/6-31G}^*$ /Gas phase)



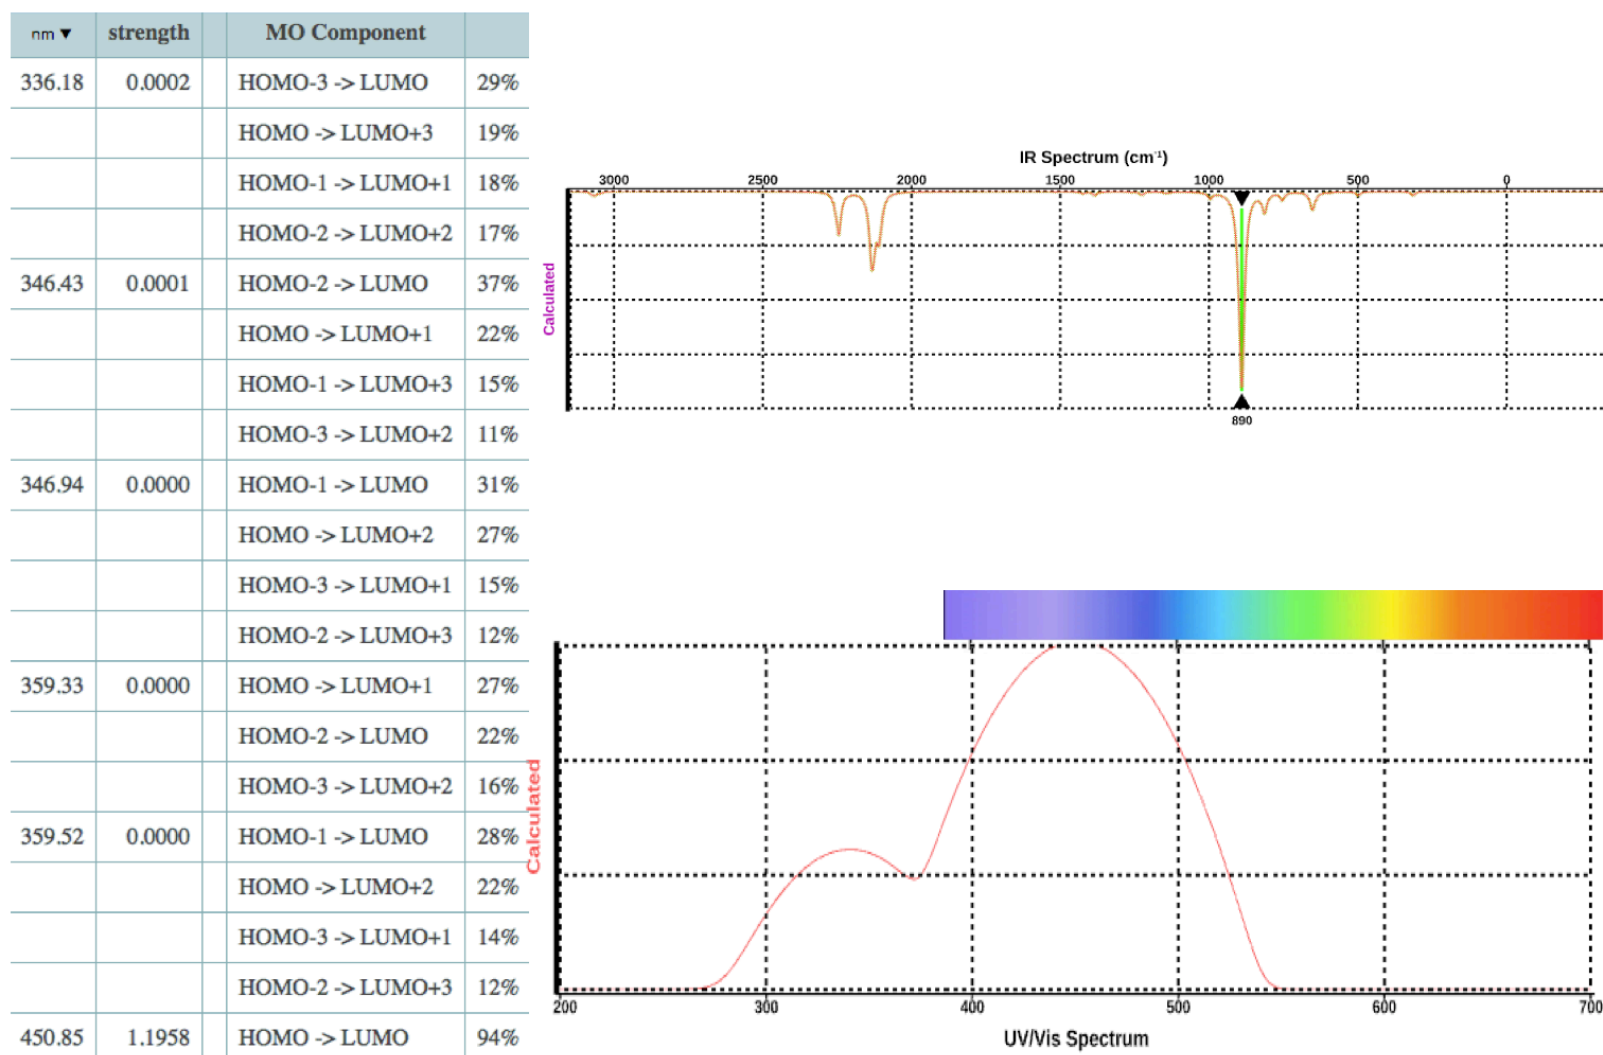

**Figure S48.** Calculated electronic and infrared spectra of  $\text{H}_3\text{Si-C}\equiv\text{C-C}\equiv\text{C-C}\equiv\text{C-C}_{14}\text{H}_8\text{-C}\equiv\text{C-C}\equiv\text{C-C}\equiv\text{C-SiH}_3$  ( $\omega\text{B97X-D/6-31G}^*/\text{Gas phase}$ ). NB: The IR absorption at  $890\text{ cm}^{-1}$  that dominates the spectrum corresponds to a  $\delta_{\text{SiH}}$  mode

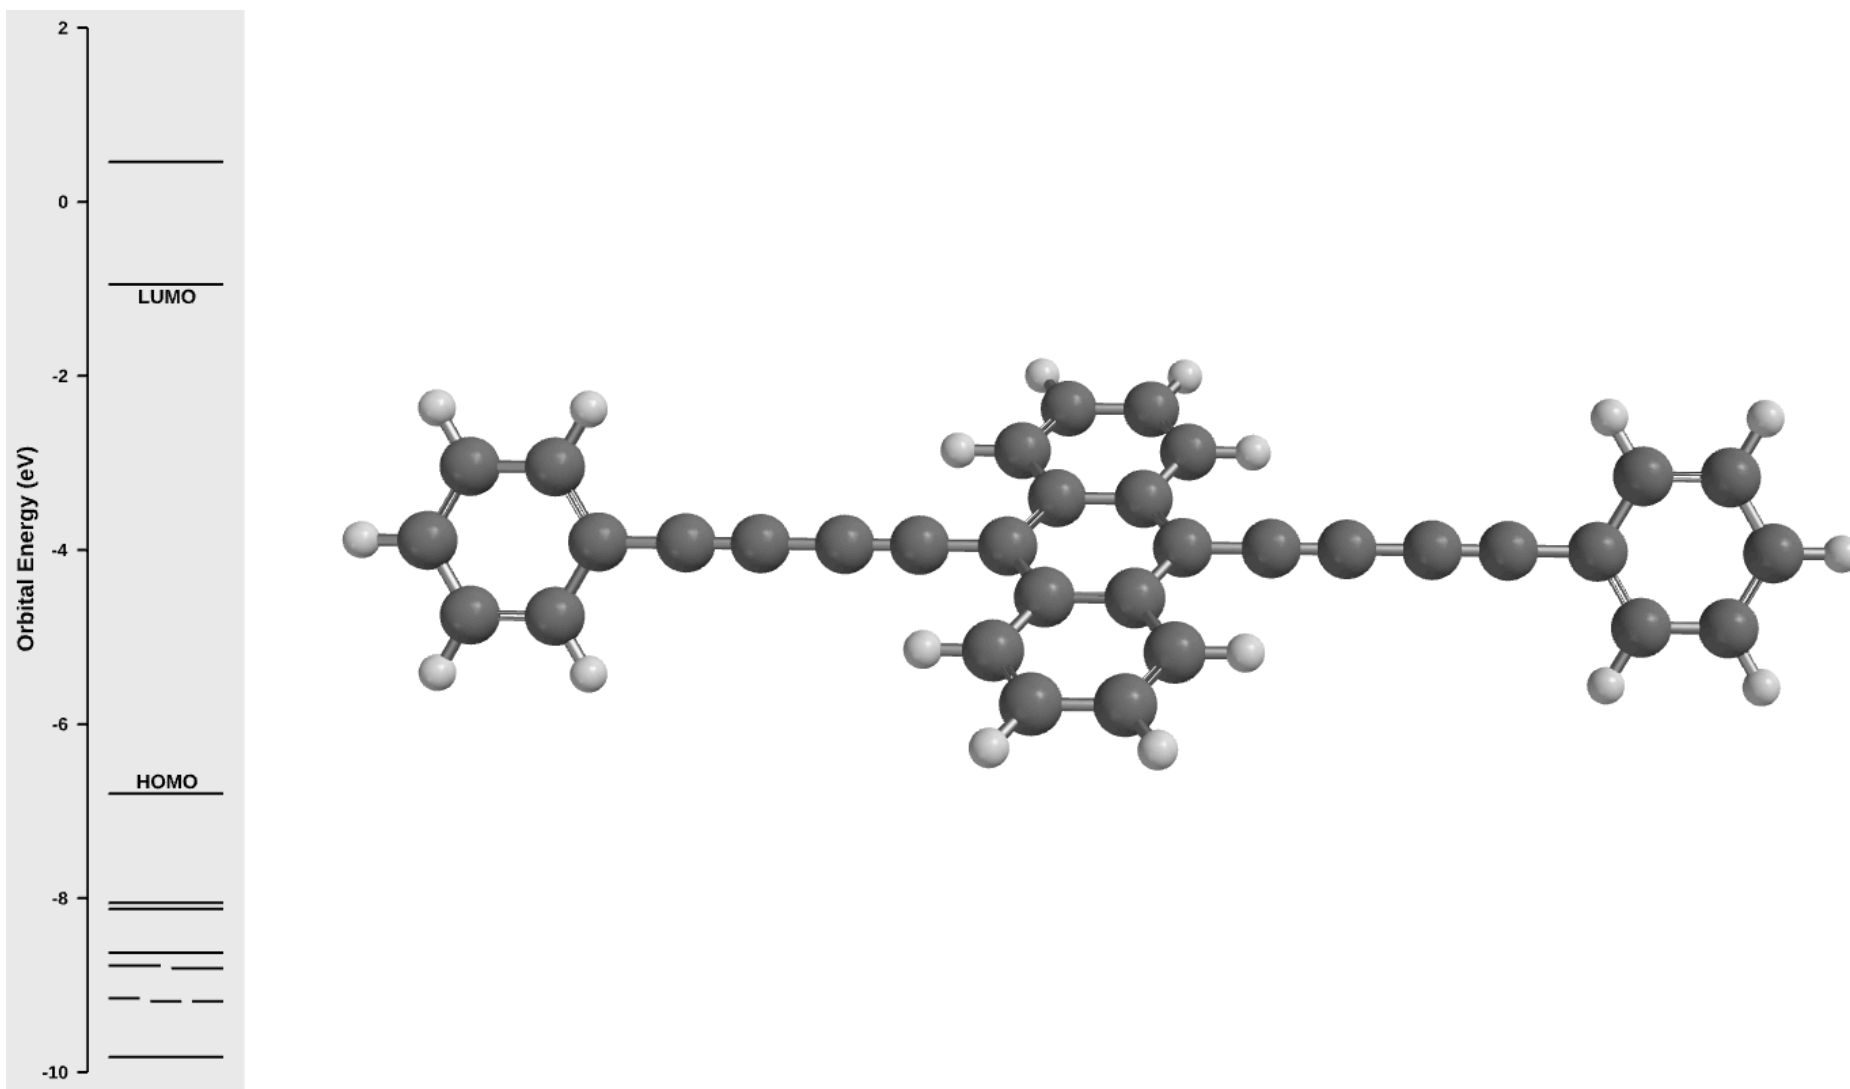

Figure S49. Optimised Geometry and frontier orbitals of Ph -C≡C-C≡C-C<sub>14</sub>H<sub>8</sub>-C≡C-C≡C- Ph ( $\omega$ B97X-D/6-31G\*/Gas phase)

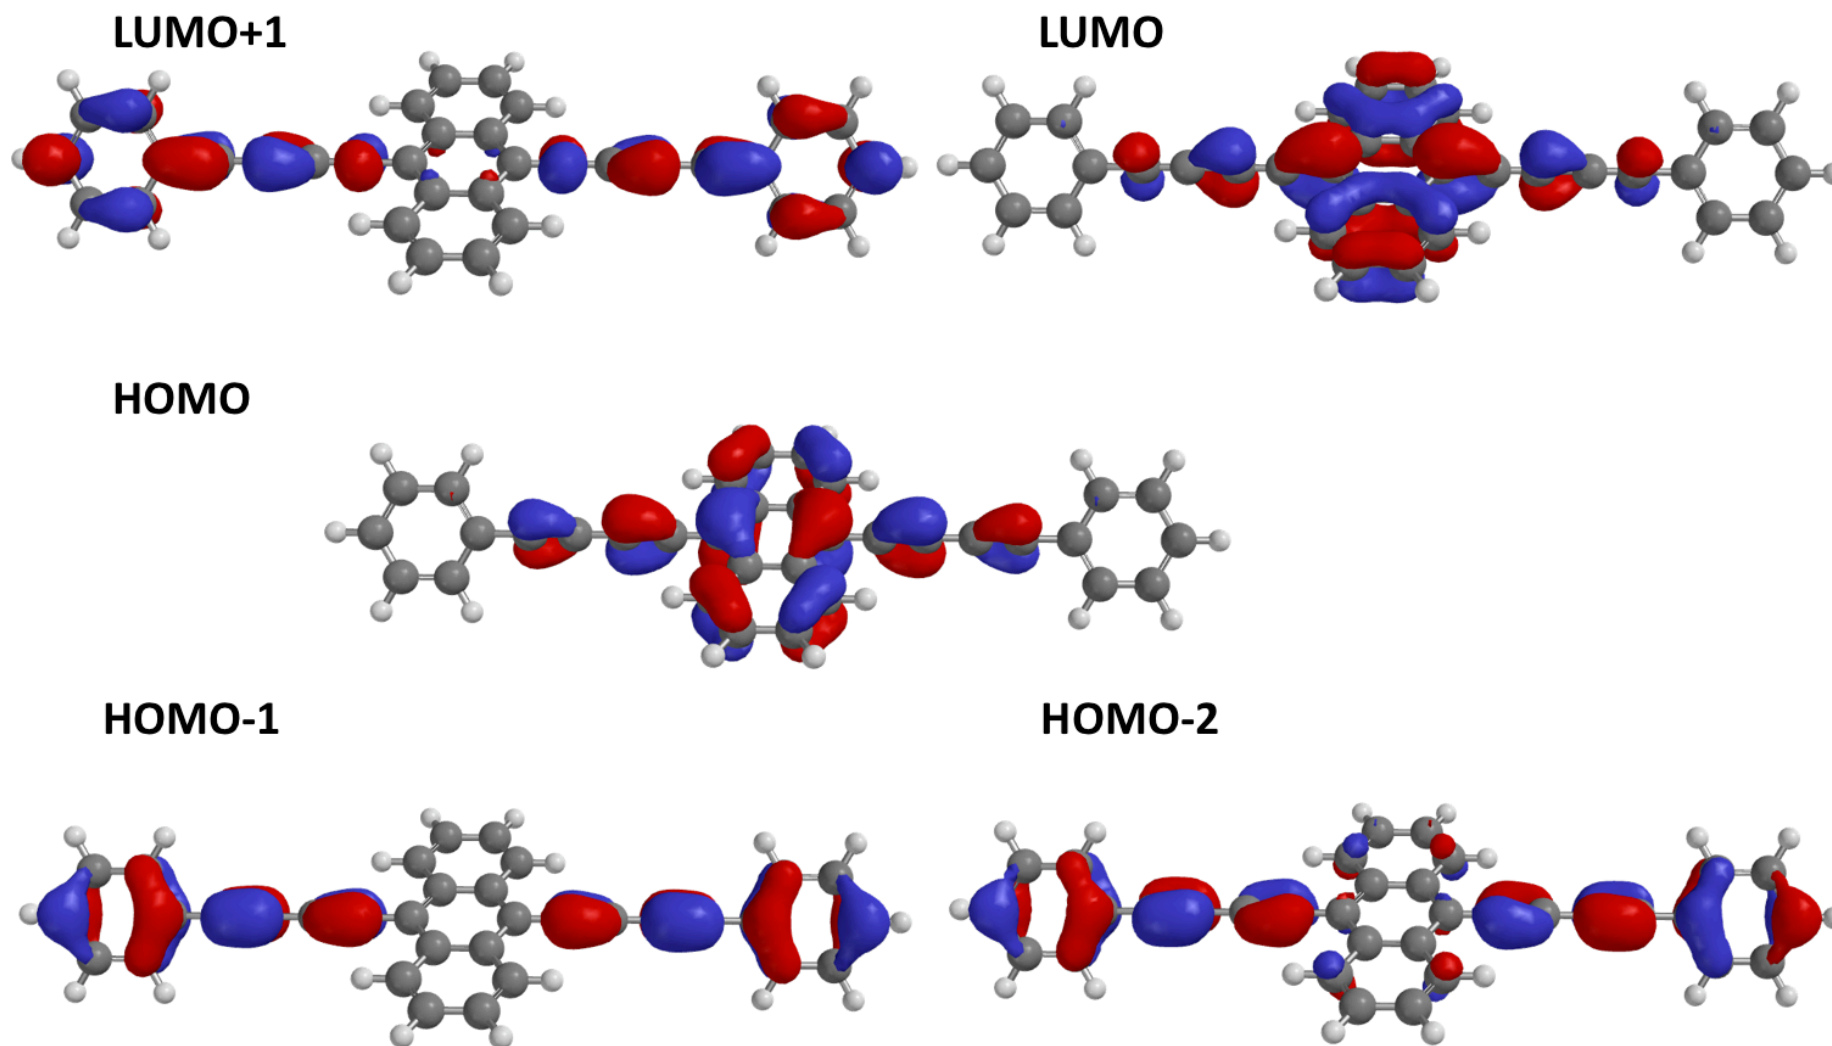

Figure S50. Frontier orbitals of interest for Ph-C≡C-C=C-C<sub>14</sub>H<sub>8</sub>-C≡C-C-Ph ( $\omega$ B97X-D/6-31G\*/Gas phase)

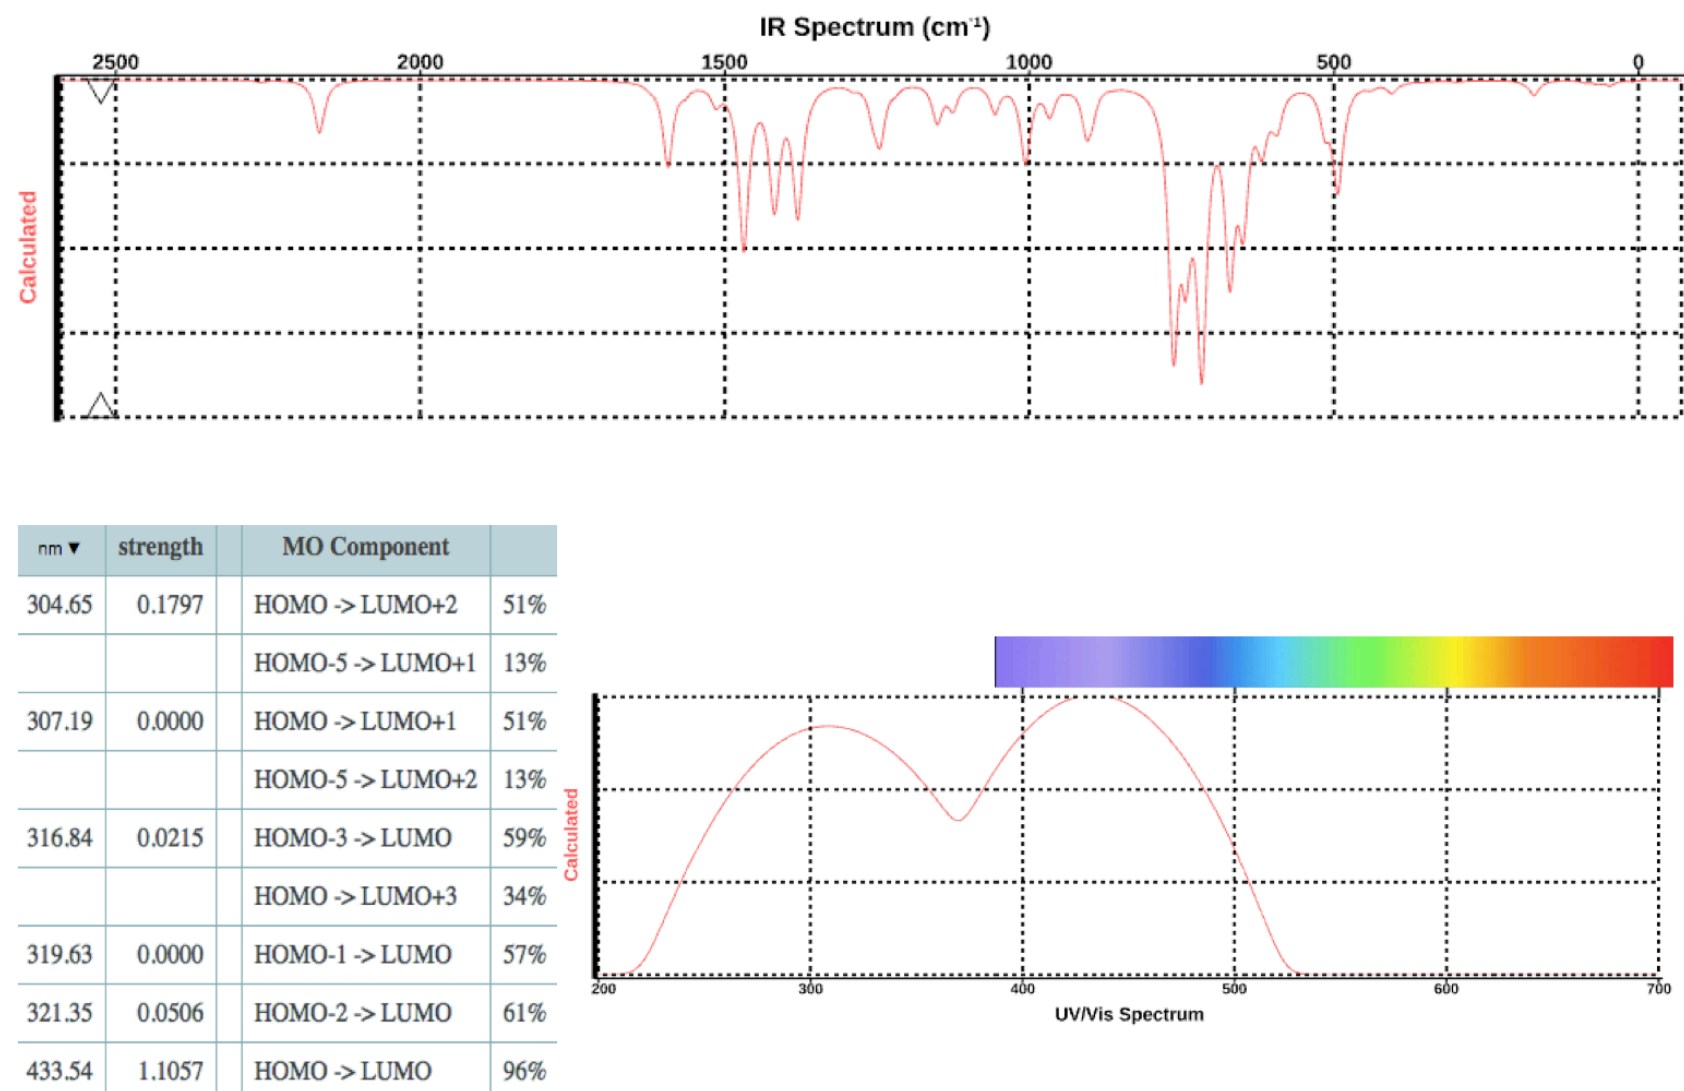

**Figure S51.** Calculated electronic and infrared spectra of Ph -C=C-C≡C-C<sub>14</sub>H<sub>8</sub>-C≡C-C=C- Ph ( $\omega$ B97X-D/6-31G\*/Gas phase)

## Cartesian Coordinates and Thermodynamic Data

### (a) 9,10-C<sub>14</sub>H<sub>8</sub>(C≡CC≡CPh)<sub>2</sub>

| Atom | x         | y         | z          |
|------|-----------|-----------|------------|
| H    | 4.586897  | 0.372737  | -1.247662  |
| C    | 3.646452  | 0.295459  | -0.710811  |
| H    | 2.470335  | 0.201366  | -2.485161  |
| C    | 2.474085  | 0.200511  | -1.400225  |
| C    | 2.474059  | 0.200678  | 1.400173   |
| C    | 1.225472  | 0.098631  | -0.714804  |
| C    | 3.646433  | 0.295552  | 0.710735   |
| C    | 1.225473  | 0.098706  | 0.714756   |
| C    | 0.000334  | 0.000583  | -1.413312  |
| H    | 4.586869  | 0.372904  | 1.247599   |
| H    | 2.470324  | 0.201673  | 2.485113   |
| C    | -1.224765 | -0.097232 | -0.714807  |
| C    | -2.473172 | -0.199227 | -1.400307  |
| C    | -1.224767 | -0.097137 | 0.714834   |
| H    | -2.469466 | -0.199784 | 2.485248   |
| C    | 0.000344  | 0.000769  | 1.413301   |
| C    | -3.645459 | -0.294238 | -0.710804  |
| H    | -2.469442 | -0.200209 | -2.485224  |
| H    | -4.585922 | -0.371707 | -1.247626  |
| C    | -3.645480 | -0.294101 | 0.710851   |
| H    | -4.585956 | -0.371454 | 1.247660   |
| C    | -2.473201 | -0.198994 | 1.400336   |
| C    | 0.000417  | 0.000018  | -2.836531  |
| C    | 0.000520  | 0.000326  | -4.051669  |
| C    | -0.000045 | -0.000175 | -5.420242  |
| C    | -0.000138 | -0.000225 | -6.633940  |
| C    | 0.000703  | 0.000715  | 2.836524   |
| C    | 0.000566  | 0.000366  | 4.051674   |
| C    | -0.000041 | -0.000015 | 5.420250   |
| C    | -0.000177 | 0.000062  | 6.633946   |
| C    | -0.000247 | -0.000324 | 8.062334   |
| C    | -0.000732 | -0.001104 | 10.855943  |
| C    | -0.829801 | 0.881832  | 8.770094   |
| C    | 0.829112  | -0.882874 | 8.769853   |
| C    | 0.825453  | -0.879736 | 10.158698  |
| C    | -0.826656 | 0.877895  | 10.158911  |
| H    | -1.469706 | 1.564797  | 8.220820   |
| H    | 1.469168  | -1.565619 | 8.220476   |
| H    | 1.469460  | -1.566575 | 10.699340  |
| H    | -1.470870 | 1.564427  | 10.699643  |
| H    | -0.000918 | -0.001373 | 11.941703  |
| C    | -0.000270 | -0.000352 | -8.062327  |
| C    | -0.000647 | -0.000957 | -10.855930 |
| C    | 0.829179  | -0.882780 | -8.769878  |
| C    | -0.829907 | 0.881765  | -8.770049  |
| C    | -0.826705 | 0.877909  | -10.158874 |
| C    | 0.825581  | -0.879559 | -10.158711 |
| H    | 1.469252  | -1.565496 | -8.220492  |
| H    | -1.469929 | 1.564631  | -8.220784  |

|   |           |           |            |
|---|-----------|-----------|------------|
| H | -1.470972 | 1.564397  | -10.699612 |
| H | 1.469677  | -1.566309 | -10.699344 |
| H | -0.000771 | -0.001153 | -11.941689 |

### Thermodynamic Properties at 298.15 K

|                          |              |         |                                                |
|--------------------------|--------------|---------|------------------------------------------------|
| Zero Point Energy :      | 998.36       | kJ/mol  | (ZPE)                                          |
| Temperature Correction : | 62.04        | kJ/mol  | (vibration + gas law + rotation + translation) |
| Enthalpy Correction :    | 1060.40      | kJ/mol  | (ZPE + temperature correction)                 |
| Enthalpy :               | -1305.385870 | au      | (Electronic Energy + Enthalpy Correction)      |
| Entropy :                | 635.84       | J/mol•K |                                                |
| Gibbs Energy :           | -1305.458075 | au      | (Enthalpy - T*Entropy)                         |
| C <sub>v</sub> :         | 461.46       | J/mol•K |                                                |

### (b) 9,10-C<sub>14</sub>H<sub>8</sub>(C≡CC≡CCSiH<sub>3</sub>)<sub>2</sub>

| Atom | x         | y         | z         |
|------|-----------|-----------|-----------|
| H    | 4.599005  | 0.001111  | -1.248086 |
| C    | 3.655592  | 0.000818  | -0.711195 |
| H    | 2.477285  | 0.001696  | -2.485995 |
| C    | 2.479600  | 0.001135  | -1.401114 |
| C    | 2.479780  | -0.000251 | 1.400428  |
| C    | 1.227899  | 0.000768  | -0.714887 |
| C    | 3.655676  | 0.000058  | 0.710249  |
| C    | 1.227995  | 0.000148  | 0.714449  |
| C    | -0.003024 | 0.000962  | -1.411044 |
| H    | 4.599179  | -0.000232 | 1.247005  |
| H    | 2.477691  | -0.000829 | 2.485318  |
| C    | -1.233839 | 0.000649  | -0.714675 |
| C    | -2.485485 | 0.000854  | -1.400762 |
| C    | -1.233735 | 0.000082  | 0.714739  |
| H    | -2.483000 | -0.000872 | 2.485923  |
| C    | -0.002846 | -0.000091 | 1.410866  |
| C    | -3.661299 | 0.000466  | -0.710555 |
| H    | -2.483376 | 0.001347  | -2.485678 |
| H    | -4.604823 | 0.000631  | -1.247283 |
| C    | -3.661198 | -0.000185 | 0.710983  |
| H    | -4.604654 | -0.000505 | 1.247822  |
| C    | -2.485287 | -0.000362 | 1.401018  |
| C    | -0.002879 | 0.000698  | -2.832276 |
| C    | -0.001227 | 0.000703  | -4.048614 |
| C    | 0.000535  | 0.000418  | -5.411713 |
| C    | 0.001944  | 0.000487  | -6.628965 |
| C    | -0.002416 | -0.000824 | 2.832105  |
| C    | -0.001211 | -0.000690 | 4.048490  |
| C    | 0.000420  | -0.000864 | 5.411587  |
| C    | 0.002433  | -0.001137 | 6.628845  |
| C    | 0.004291  | -0.000304 | -7.994396 |
| C    | 0.005955  | -0.000600 | -9.213076 |
| C    | 0.003532  | -0.000311 | 7.994753  |

|    |           |           |            |
|----|-----------|-----------|------------|
| C  | 0.004809  | -0.000283 | 9.213337   |
| Si | 0.005966  | -0.000992 | -11.040534 |
| H  | -0.692486 | 1.209609  | -11.532498 |
| H  | -0.693792 | -1.211124 | -11.532006 |
| H  | 1.404034  | -0.001874 | -11.531512 |
| Si | 0.005491  | 0.000003  | 11.040762  |
| H  | -0.693103 | -1.210369 | 11.533238  |
| H  | -0.692878 | 1.210599  | 11.533000  |
| H  | 1.403448  | -0.000542 | 11.531946  |

**Thermodynamic Properties at 298.15 K**

|                          |              |         |                                                |
|--------------------------|--------------|---------|------------------------------------------------|
| Zero Point Energy :      | 716.59       | kJ/mol  | (ZPE)                                          |
| Temperature Correction : | 61.36        | kJ/mol  | (vibration + gas law + rotation + translation) |
| Enthalpy Correction :    | 777.96       | kJ/mol  | (ZPE + temperature correction)                 |
| Enthalpy :               | -1577.145211 | au      | (Electronic Energy + Enthalpy Correction)      |
| Entropy :                | 634.39       | J/mol•K |                                                |
| Gibbs Energy :           | -1577.217251 | au      | (Enthalpy - T*Entropy)                         |
| C <sub>v</sub> :         | 434.83       | J/mol•K |                                                |

**(c) 9,10-C<sub>14</sub>H<sub>8</sub>(C≡CC≡CAuPH<sub>3</sub>)<sub>2</sub>**

| Atom | x         | y        | z         |
|------|-----------|----------|-----------|
| H    | -4.600613 | 0.001149 | -1.248494 |
| C    | -3.657143 | 0.001571 | -0.710898 |
| H    | -2.474705 | 0.002042 | -2.485149 |
| C    | -2.480668 | 0.002067 | -1.400095 |
| C    | -2.480659 | 0.002087 | 1.400027  |
| C    | -1.227652 | 0.002478 | -0.714797 |
| C    | -3.657137 | 0.001584 | 0.710860  |
| C    | -1.227648 | 0.002483 | 0.714720  |
| C    | -0.000160 | 0.002870 | -1.416934 |
| H    | -4.600599 | 0.001178 | 1.248467  |
| H    | -2.474678 | 0.002081 | 2.485080  |
| C    | 1.227335  | 0.002481 | -0.714803 |
| C    | 2.480348  | 0.002082 | -1.400107 |
| C    | 1.227338  | 0.002480 | 0.714714  |
| H    | 2.474376  | 0.002049 | 2.485068  |
| C    | -0.000153 | 0.002874 | 1.416859  |
| C    | 3.656826  | 0.001582 | -0.710916 |
| H    | 2.474380  | 0.002072 | -2.485161 |
| H    | 4.600294  | 0.001174 | -1.248516 |
| C    | 3.656826  | 0.001573 | 0.710843  |
| H    | 4.600292  | 0.001153 | 1.248444  |
| C    | 2.480352  | 0.002071 | 1.400015  |
| C    | -0.000164 | 0.003836 | -2.839936 |
| C    | -0.000163 | 0.004919 | -4.055763 |
| C    | -0.000151 | 0.005528 | -5.425409 |
| C    | -0.000145 | 0.005953 | -6.647271 |
| C    | -0.000149 | 0.003841 | 2.839975  |
| C    | -0.000150 | 0.004929 | 4.055873  |

|    |           |           |            |
|----|-----------|-----------|------------|
| C  | -0.000162 | 0.005525  | 5.425203   |
| C  | -0.000167 | 0.005956  | 6.647145   |
| Au | -0.000109 | 0.003055  | -8.631874  |
| Au | -0.000201 | 0.003053  | 8.632082   |
| P  | -0.000285 | -0.007627 | 10.960148  |
| H  | -0.214239 | -1.233147 | 11.610813  |
| H  | -0.951202 | 0.781551  | 11.626835  |
| H  | 1.163054  | 0.411626  | 11.625259  |
| P  | -0.000024 | -0.007622 | -10.959925 |
| H  | 1.172943  | -0.416203 | -11.614343 |
| H  | -0.231894 | 1.205058  | -11.628638 |
| H  | -0.933347 | -0.823411 | -11.619405 |

**Thermodynamic Properties at 298.15 K**

|                          |              |         |                                                |
|--------------------------|--------------|---------|------------------------------------------------|
| Zero Point Energy :      | 684.73       | kJ/mol  | (ZPE)                                          |
| Temperature Correction : | 60.66        | kJ/mol  | (vibration + gas law + rotation + translation) |
| Enthalpy Correction :    | 745.39       | kJ/mol  | (ZPE + temperature correction)                 |
| Enthalpy :               | -1799.591814 | au      | (Electronic Energy + Enthalpy Correction)      |
| Entropy :                | 650.51       | J/mol•K |                                                |
| Gibbs Energy :           | -1799.665686 | au      | (Enthalpy - T*Entropy)                         |
| C <sub>v</sub> :         | 419.72       | J/mol•K |                                                |

**(d) 9,10-C<sub>14</sub>H<sub>8</sub>(C≡CC≡CAuCO)<sub>2</sub>**

| Atom | x         | y        | z         |
|------|-----------|----------|-----------|
| H    | 4.599905  | 0.002061 | -1.245355 |
| C    | 3.656095  | 0.001755 | -0.708692 |
| H    | 2.476349  | 0.001842 | -2.483915 |
| C    | 2.480305  | 0.001637 | -1.398911 |
| C    | 2.478504  | 0.001180 | 1.401745  |
| C    | 1.227354  | 0.001369 | -0.714032 |
| C    | 3.655159  | 0.001424 | 0.712941  |
| C    | 1.226429  | 0.001201 | 0.715343  |
| C    | -0.000786 | 0.001175 | -1.414607 |
| H    | 4.598276  | 0.001430 | 1.250840  |
| H    | 2.473288  | 0.000964 | 2.486726  |
| C    | -1.229912 | 0.001040 | -0.715522 |
| C    | -2.482127 | 0.000981 | -1.401853 |
| C    | -1.230841 | 0.000879 | 0.713890  |
| H    | -2.479933 | 0.000342 | 2.483761  |
| C    | -0.002619 | 0.000916 | 1.414433  |
| C    | -3.658846 | 0.000809 | -0.713052 |
| H    | -2.476883 | 0.001178 | -2.486855 |
| H    | -4.601976 | 0.000876 | -1.250943 |
| C    | -3.659791 | 0.000498 | 0.708550  |
| H    | -4.603608 | 0.000283 | 1.245209  |
| C    | -2.483936 | 0.000547 | 1.398734  |
| C    | 0.000404  | 0.000714 | -2.837033 |
| C    | 0.000510  | 0.000267 | -4.052761 |
| C    | 0.000490  | 0.000069 | -5.420927 |

|    |           |           |            |
|----|-----------|-----------|------------|
| C  | -0.001122 | 0.000386  | -6.642365  |
| C  | -0.002828 | 0.000561  | 2.836847   |
| C  | -0.001242 | 0.001229  | 4.052567   |
| C  | -0.000247 | 0.002915  | 5.420732   |
| C  | 0.001036  | 0.005385  | 6.642169   |
| Au | -0.001129 | -0.000660 | -8.616647  |
| Au | 0.003964  | 0.006191  | 8.616416   |
| C  | 0.009575  | -0.003127 | 10.570578  |
| O  | 0.015160  | -0.017442 | 11.704670  |
| C  | 0.004040  | -0.004163 | -10.569338 |
| O  | 0.010983  | -0.007504 | -11.703344 |

### Thermodynamic Properties at 298.15 K

|                          |              |         |                                                |
|--------------------------|--------------|---------|------------------------------------------------|
| Zero Point Energy :      | 587.49       | kJ/mol  | (ZPE)                                          |
| Temperature Correction : | 56.96        | kJ/mol  | (vibration + gas law + rotation + translation) |
| Enthalpy Correction :    | 644.45       | kJ/mol  | (ZPE + temperature correction)                 |
| Enthalpy :               | -1339.940169 | au      | (Electronic Energy + Enthalpy Correction)      |
| Entropy :                | 626.83       | J/mol•K |                                                |
| Gibbs Energy :           | -1340.011352 | au      | (Enthalpy - T*Entropy)                         |
| $C_v$ :                  | 391.77       | J/mol•K |                                                |
